# Supplementary material for: Chemokine expression profile of an innate granuloma
Source: bioRxiv preprint, doi:10.1101/2024.01.30.577927, version 2 (2024-06-06)
Supplement: Table 4 - source data 1 [file 577927_file04.xlsx]

## Sheet: FINAL-log2FC MF
p_val	avg_log2FC	pct.1	pct.2	p_val_adj	Cluster Number	Cluster Name	gene
2.91644562057193e-174	5.03577	0.987	0.204	4.61644177280331e-170	14	rep HEP	Ly6d
1.92102778330447e-136	4.64597	0.444	0.06	3.04079487819264e-132	8	CN-M1	Ptgs2
5.57657362239882e-135	4.63649	0.319	0.027	8.82715838689509e-131	8	CN-M1	Il11
3.70956950102648e-161	4.5621	0.283	0.016	5.87187756317482e-157	6	CN-M2	Col11a1
1.15867272719788e-143	4.51898	0.346	0.016	1.83406305988152e-139	14	rep HEP	Moxd1
2.44698458753063e-118	4.38742	0.966	0.152	3.87333190360224e-114	15	OG	Ccl8
1.84814725163642e-81	4.36079	0.684	0.304	2.92543228461528e-77	8	CN-M1	Cxcl10
2.42493093253679e-94	4.2983	0.728	0.333	3.83842317311249e-90	8	CN-M1	Cxcl9
2.27190427102337e-95	4.2894	0.262	0.027	3.5961972706029e-91	8	CN-M1	Il6
4.83315772971047e-154	4.20713	0.289	0.018	7.6504053703587e-150	6	CN-M2	Ptprn
5.8133334081682e-171	4.2	0.559	0.081	9.20192545178945e-167	8	CN-M1	Serpine1
5.19045029443195e-100	4.18423	0.325	0.041	8.21596377105633e-96	8	CN-M1	Hspa1a
3.02520723697136e-68	4.13472	0.35	0.074	4.78860053540196e-64	8	CN-M1	Adm
1.60987810526449e-83	4.12046	0.275	0.036	2.54827605282315e-79	8	CN-M1	Gm15056
5.8074196761782e-117	4.09138	0.269	0.023	9.19256460542247e-113	6	CN-M2	Ccl11
3.77576639352593e-123	4.07898	0.556	0.111	5.97666062431219e-119	8	CN-M1	Nos2
6.76426723704585e-134	4.03638	0.391	0.045	1.07071586095199e-129	8	CN-M1	Gbp5
2.87876369139225e-144	4.02534	0.3	0.022	4.55679504710479e-140	6	CN-M2	Prnd
1.54095467169152e-104	4.01346	0.269	0.025	2.4391771498205e-100	8	CN-M1	Olr1
2.84533556525532e-199	3.97755	0.475	0.046	4.50388166624265e-195	6	CN-M2	Cthrc1
8.35586093342627e-98	3.93922	0.603	0.189	1.32264922715204e-93	8	CN-M1	Rnd1
3.32703717395053e-240	3.93831	0.773	0.099	5.26636714264629e-236	9	CN	F13a1
6.32663038042244e-206	3.90927	0.837	0.149	1.00144232291707e-201	9	CN	Cxcl3
9.22299383228831e-169	3.84834	0.611	0.107	1.45990769371292e-164	6	CN-M2	Gpnmb
6.82376426393196e-172	3.81781	0.981	0.372	1.08013364533779e-167	9	CN	Pf4
6.13230236653322e-60	3.81209	0.594	0.267	9.70682141598544e-56	8	CN-M1	Retnlg
1.35350644507698e-112	3.80119	0.253	0.021	2.14246535191236e-108	6	CN-M2	Actg2
2.23085002688284e-126	3.79218	0.476	0.042	3.53121250755285e-122	13	EC1	Derl3
1.4116911227393e-140	3.74447	0.622	0.067	2.23456587818403e-136	14	rep HEP	BC049987
6.36436248921373e-229	3.74416	0.683	0.1	1.00741493841764e-224	6	CN-M2	Fbln2
2.65917940176462e-93	3.73811	0.34	0.027	4.20921507505322e-89	14	rep HEP	Esco2
1.52914048133939e-183	3.73009	0.962	0.3	2.42047646791212e-179	9	CN	Mmp9
2.68254790348636e-46	3.69896	0.462	0.176	4.24620507642856e-42	8	CN-M1	Il1a
8.46367221963132e-58	3.69848	0.272	0.05	1.33971467564544e-53	8	CN-M1	F3
5.33335315699815e-79	3.69042	0.666	0.279	8.44216471221238e-75	8	CN-M1	Cxcl2
2.8299993026453e-139	3.66225	0.403	0.05	4.47960589615725e-135	6	CN-M2	Col12a1
3.66330867197566e-136	3.65877	0.311	0.027	5.79865129687027e-132	6	CN-M2	Sulf1
5.81565590190295e-116	3.64024	0.308	0.033	9.20560172712218e-112	6	CN-M2	Mmp13
2.66577249896283e-92	3.63845	0.294	0.039	4.21965128860826e-88	6	CN-M2	Sfrp1
1.53155526474023e-226	3.62592	0.639	0.084	2.4242988285573e-222	6	CN-M2	Fkbp10
7.69095623177609e-265	3.62404	0.574	0.06	1.21740146192784e-260	3	HEP4	Acot3
9.23471250911413e-179	3.60797	0.922	0.486	1.46176264306767e-174	2	HEP0	Mup11
3.11180781940282e-88	3.59939	0.311	0.025	4.92568059733272e-84	13	EC1	3930402G23Rik
1.31153098540109e-112	3.59534	0.866	0.294	2.07602239679139e-108	10	EC2	Hbb-bt
2.42490398445747e-69	3.58872	0.444	0.118	3.83838051699773e-65	8	CN-M1	Procr
2.04121486417241e-134	3.5883	0.551	0.053	3.23103900849851e-130	14	rep HEP	Gsta1
9.40110799688421e-113	3.58716	0.526	0.058	1.4881013848268e-108	14	rep HEP	Cdkn3
2.22460287702525e-46	3.57863	0.441	0.164	3.52132389404326e-42	8	CN-M1	AA467197
3.39198251095097e-145	3.56222	0.628	0.064	5.36916911658428e-141	14	rep HEP	Chrna4
3.64650042401875e-138	3.55409	0.596	0.061	5.77204552117928e-134	14	rep HEP	Nat8
9.30277345187968e-229	3.5479	0.703	0.108	1.47253600969803e-224	6	CN-M2	Lox
7.72145468659589e-182	3.52374	0.633	0.081	1.22222906234126e-177	9	CN	Ptges
2.52513797546201e-115	3.48625	0.506	0.052	3.99704090135881e-111	14	rep HEP	Nat8f5
1.21045560756709e-128	3.4699	0.981	0.285	1.91603018121795e-124	14	rep HEP	Mup1
2.80637587536985e-240	3.45447	0.822	0.155	4.44221237312293e-236	6	CN-M2	Acta2
3.0710948908127e-177	3.45398	0.65	0.12	4.86123610266742e-173	6	CN-M2	Col15a1
6.48188972730784e-99	3.45353	1	0.746	1.02601832493556e-94	14	rep HEP	Thrsp
5.86926624039208e-132	3.4485	0.333	0.033	9.29046153191662e-128	6	CN-M2	Nbl1
5.09074188191652e-222	3.44718	0.911	0.261	8.05813532488566e-218	6	CN-M2	Col5a2
1.85609754345886e-68	3.44231	0.509	0.157	2.93801680154103e-64	8	CN-M1	Plaur
3.19782387349975e-106	3.43994	0.513	0.058	5.06183540936275e-102	14	rep HEP	Gm32468
1.31948334480756e-201	3.41867	0.892	0.273	2.08861018649588e-197	6	CN-M2	Col5a1
8.51570253444018e-182	3.40084	0.664	0.121	1.34795055417654e-177	6	CN-M2	Tnc
5.08272700308642e-34	3.40057	0.697	0.539	8.04544857318549e-30	8	CN-M1	Il1b
5.33671424955045e-118	3.40031	0.628	0.083	8.4474849856134e-114	14	rep HEP	Cdca3
4.0795434552102e-108	3.39555	0.289	0.03	6.45750933525223e-104	6	CN-M2	Prrx1
2.58890095277292e-187	3.39363	0.994	0.568	4.09797131814426e-183	6	CN-M2	Col1a2
1.09572739145514e-200	3.38313	0.994	0.476	1.73442688793433e-196	6	CN-M2	Col1a1
2.84448728195341e-59	3.38101	0.301	0.035	4.50253891860406e-55	14	rep HEP	Hebp2
3.04014940458915e-107	3.37695	0.278	0.028	4.81225249252416e-103	6	CN-M2	Sphk1
5.03441430919183e-139	3.37269	0.854	0.162	7.96897441001975e-135	13	EC1	Hyou1
1.60848449356909e-198	3.34715	0.853	0.219	2.54607010487052e-194	6	CN-M2	Cxcl5
4.90753975002525e-60	3.33063	0.288	0.031	7.76814467031497e-56	14	rep HEP	Ect2
5.5490477224194e-108	3.32789	0.381	0.058	8.78358763981767e-104	6	CN-M2	Ly6c1
5.09519702127441e-76	3.32478	0.569	0.188	8.06518736497526e-72	8	CN-M1	Upp1
2.125352271534e-92	3.32448	0.487	0.06	3.36422011061117e-88	14	rep HEP	Pbk
5.62200535169444e-112	3.3222	0.306	0.033	8.89907227119713e-108	6	CN-M2	Vcan
7.09697672021816e-82	3.30848	0.691	0.304	1.12338044504333e-77	8	CN-M1	Gbp2
1.62329858305595e-74	3.30325	0.537	0.163	2.56951932711926e-70	8	CN-M1	Ccrl2
4.89502238967822e-108	3.30149	0.325	0.041	7.74833094062165e-104	6	CN-M2	Ccn4
9.40966580152326e-92	3.29691	0.309	0.04	1.48945599972312e-87	8	CN-M1	Maff
9.23882264978826e-158	3.29126	0.461	0.057	1.46241323723498e-153	6	CN-M2	Plod2
8.52800457632871e-62	3.28894	0.517	0.064	1.34989784438707e-57	15	OG	Gm32468
3.30578326021127e-216	3.28261	0.811	0.175	5.23272432258842e-212	6	CN-M2	Fbn1
2.34191281896651e-91	3.26405	0.965	0.53	3.70701380114208e-87	10	EC2	Hba-a1
2.06313847013543e-80	3.25784	0.375	0.072	3.26574188437737e-76	8	CN-M1	Csrnp1
9.45720298952458e-86	3.2571	0.5	0.07	1.49698066121185e-81	14	rep HEP	Cdc20
1.5650141255009e-94	3.25501	0.286	0.035	2.47726085925537e-90	6	CN-M2	Syngr1
1.25935091836129e-119	3.25094	0.372	0.049	1.99342656867409e-115	6	CN-M2	P3h4
4.79936556312265e-46	3.24701	0.431	0.156	7.59691574986684e-42	8	CN-M1	Ubd
2.28175240140452e-170	3.24396	0.483	0.058	3.61178587618322e-166	6	CN-M2	Lgi2
5.27622557125446e-138	3.24088	0.397	0.047	8.35173745673868e-134	6	CN-M2	Plat
2.806695499729e-167	3.23859	0.6	0.102	4.44271830652104e-163	6	CN-M2	Serpine2
8.58986730392091e-111	3.22737	0.375	0.055	1.35969009553764e-106	6	CN-M2	Olfml2b
4.70315876217188e-71	3.22541	0.484	0.135	7.44463000464186e-67	8	CN-M1	Rsad2
2.67882170047326e-46	3.22466	0.697	0.517	4.24030686967913e-42	8	CN-M1	Cd14
1.97251815938962e-101	3.22316	0.987	0.584	3.12229899449783e-97	14	rep HEP	Gpam
9.08489667207991e-107	3.21935	0.406	0.068	1.43804829422353e-102	6	CN-M2	Ctsk
5.4006000127778e-86	3.21813	0.933	0.513	8.54860976022597e-82	10	EC2	Hba-a2
6.7813628929495e-134	3.20778	0.444	0.065	1.07342193232498e-129	6	CN-M2	Adam12
7.2595129689334e-46	3.20691	0.263	0.034	1.14910830785247e-41	14	rep HEP	Nek2
5.61494662963893e-70	3.20082	0.537	0.168	8.88789902005547e-66	8	CN-M1	Mxd1
1.77884449095313e-78	3.19863	0.442	0.058	2.81573294472971e-74	14	rep HEP	Aurka
1.69221938875953e-68	3.1941	0.537	0.174	2.67861407046747e-64	8	CN-M1	Slfn4
9.16045442644843e-72	3.19354	0.462	0.123	1.45000833116252e-67	8	CN-M1	Cd274
9.63558200217712e-209	3.19238	0.819	0.188	1.52521627512462e-204	6	CN-M2	Fstl1
1.4058319247259e-131	3.18761	0.478	0.079	2.22529135364863e-127	6	CN-M2	Cavin3
1.75125100869773e-75	3.18619	0.488	0.134	2.77205522166763e-71	8	CN-M1	Ripk2
6.56359024318233e-195	3.18333	0.936	0.335	1.03895069959333e-190	6	CN-M2	Timp1
2.60070974080614e-94	3.18167	0.297	0.039	4.11666344872204e-90	6	CN-M2	Adamts12
1.08276664775276e-74	3.17628	0.409	0.054	1.71391132672784e-70	13	EC1	Sult3a1
1.47369338849132e-59	3.17542	0.613	0.253	2.33270926464292e-55	8	CN-M1	Acod1
1.25614015567903e-66	3.16863	0.378	0.05	1.98834425242434e-62	14	rep HEP	Plk1
3.80762633292346e-51	3.16378	0.276	0.034	6.02709172238455e-47	14	rep HEP	Hmmr
2.09784741685588e-66	3.1563	0.637	0.288	3.32068267614117e-62	8	CN-M1	Ier3
3.50470301532374e-55	3.15592	0.503	0.18	5.54759440295594e-51	8	CN-M1	Ly6i
1.83405425842021e-100	3.15166	0.339	0.049	2.90312448565335e-96	6	CN-M2	Spsb1
3.37340916392973e-190	3.14909	0.754	0.118	5.33976936558436e-186	9	CN	Cstdc4
8.21499906172029e-159	3.14752	0.544	0.085	1.3003522014797e-154	6	CN-M2	Emp1
2.15519618588797e-201	3.13232	0.989	0.478	3.41146004264207e-197	6	CN-M2	Serpinh1
9.56466151022774e-140	3.13156	0.606	0.132	1.51399027045395e-135	6	CN-M2	Col5a3
9.61492240479522e-64	3.13066	0.372	0.05	1.52194606745504e-59	14	rep HEP	2810408I11Rik
2.03859892050743e-86	3.1297	0.345	0.047	3.22689823127121e-82	9	CN	Gpr84
2.16015121553198e-93	3.12771	1	0.971	3.41930335906557e-89	14	rep HEP	Scd1
2.31433936269577e-116	3.12277	0.631	0.164	3.66336777721113e-112	6	CN-M2	Mmp12
9.35499112753208e-189	3.11487	0.889	0.291	1.48080154557705e-184	6	CN-M2	Rcn3
3.3924237311398e-50	3.11241	0.391	0.118	5.36986752402119e-46	8	CN-M1	Hspa1b
6.63330812855087e-58	3.11225	0.359	0.051	1.04998634366832e-53	14	rep HEP	Kif20a
6.56307003606232e-142	3.11168	0.747	0.227	1.0388683560083e-137	6	CN-M2	Postn
6.03390548764335e-168	3.10398	0.994	0.724	9.55106899639066e-164	6	CN-M2	Col3a1
1.71860051292539e-66	3.10003	0.294	0.051	2.7203727519096e-62	8	CN-M1	Tarm1
1.35942644390734e-122	3.09926	0.397	0.055	2.15183611806093e-118	6	CN-M2	Antxr1
3.09745305372721e-50	3.0894	0.544	0.218	4.9029584387448e-46	8	CN-M1	Clec4e
6.26749492353832e-175	3.08725	0.911	0.33	9.92081771446881e-171	6	CN-M2	Gpx3
1.18130821960853e-103	3.08329	0.987	0.43	1.86989278081834e-99	14	rep HEP	Mup7
1.10280341837657e-105	3.08066	1	0.554	1.74562753094827e-101	14	rep HEP	Mrap
1.44653126302676e-84	3.0752	0.281	0.039	2.28971433624505e-80	6	CN-M2	Snai1
8.37589501240433e-90	3.07294	0.782	0.237	1.32582042151348e-85	12	HEP2	Elovl3
9.59039042529736e-49	3.06623	0.491	0.185	1.51806290042032e-44	8	CN-M1	Hilpda
2.4950105196644e-37	3.05791	0.341	0.112	3.94935215157679e-33	8	CN-M1	Inhba
6.19231183926572e-77	3.05271	0.487	0.072	9.80181041037371e-73	14	rep HEP	Ccnb1
1.68076615112696e-162	3.05158	0.792	0.231	2.66048474061886e-158	6	CN-M2	Ppic
1.57191143192439e-92	3.05014	0.744	0.157	2.48817860559311e-88	14	rep HEP	Ces2c
4.85764918089047e-115	3.0487	0.417	0.066	7.68917288843152e-111	6	CN-M2	Htra1
2.67370261000946e-19	3.04569	0.616	0.514	4.23220386138397e-15	8	CN-M1	G0s2
3.7045810722699e-34	3.04404	0.738	0.61	5.86398137929602e-30	8	CN-M1	Srgn
1.45399758541175e-72	3.04388	0.449	0.064	2.30153277794826e-68	14	rep HEP	Knstrn
1.77013848959478e-92	3.04372	0.656	0.237	2.80195221517958e-88	6	CN-M2	Mgp
2.80139779473297e-97	3.0422	1	0.734	4.43433256928281e-93	14	rep HEP	Acly
1.061625158019e-124	3.04167	0.957	0.273	1.68044646262828e-120	13	EC1	Sdf2l1
6.11701048903561e-66	3.0408	0.359	0.079	9.68261590309447e-62	8	CN-M1	Ifi205
1.80093298506154e-64	3.03906	0.528	0.185	2.85069682205391e-60	8	CN-M1	Serpina3f
2.48492894974365e-91	3.03463	0.992	0.764	3.93339403454922e-87	10	EC2	Hbb-bs
2.93952461670964e-185	3.03093	0.85	0.239	4.65297351578969e-181	6	CN-M2	Ccl7
6.44151250768904e-42	3.02354	0.276	0.041	1.0196270148421e-37	14	rep HEP	Gm3839
9.42418637384757e-95	3.01947	0.375	0.065	1.49175446111633e-90	6	CN-M2	Rasl11a
2.17523569658296e-67	3.01624	0.487	0.084	3.44318058412117e-63	14	rep HEP	Cenpm
3.40047271476324e-64	3.0149	0.691	0.381	5.38260826019874e-60	8	CN-M1	Ccl2
1.83461685904499e-95	3.01298	0.311	0.042	2.90401502618231e-91	6	CN-M2	Hoxb2
3.34648709437792e-49	3.01273	0.703	0.501	5.29715442169081e-45	8	CN-M1	Isg15
3.99674502425547e-171	3.01061	0.681	0.137	6.32644769889398e-167	6	CN-M2	Col6a2
4.25274310777442e-86	3.00906	0.292	0.041	6.73166706529613e-82	6	CN-M2	Kcnn4
2.70662901915163e-155	3.00749	0.754	0.152	4.28432307441511e-151	9	CN	Itgam
2.50728244389975e-130	3.00612	0.419	0.057	3.96877738044891e-126	6	CN-M2	Mfap2
3.64736093937642e-100	3.00552	0.336	0.047	5.77340763093894e-96	6	CN-M2	Cd248
4.73667281473034e-177	3.00526	1	0.797	7.49767939843665e-173	6	CN-M2	Sparc
1.21936645795761e-186	3.00122	0.717	0.139	1.93013516630109e-182	6	CN-M2	Aebp1
2.26129484610157e-51	2.99931	0.327	0.047	3.57940361189417e-47	14	rep HEP	C330021F23Rik
4.1901819676482e-57	2.99684	0.478	0.156	6.63263903659033e-53	8	CN-M1	Hdc
6.03735130296243e-56	2.99187	0.591	0.247	9.55652337745922e-52	8	CN-M1	Ccl4
1.95731511424643e-108	2.99147	0.936	0.275	3.09823409434068e-104	14	rep HEP	Gstp1
4.9983821578408e-70	2.99125	0.256	0.039	7.9119391176462e-66	6	CN-M2	Cyp1b1
4.76449255851473e-99	2.98732	1	0.895	7.54171527087296e-95	13	EC1	Apcs
3.81228130097147e-82	2.98523	0.545	0.086	6.03446007130775e-78	14	rep HEP	Spc25
7.47936862578987e-121	2.98016	0.525	0.106	1.18390925977628e-116	6	CN-M2	Thbs2
1.45690246250835e-99	2.97416	0.994	0.571	2.30613090790447e-95	14	rep HEP	Acss2
4.16061645636826e-35	2.96689	0.393	0.063	6.58583978878532e-31	15	OG	Kdelr3
2.19432392084084e-154	2.96483	0.739	0.143	3.47339533429897e-150	9	CN	Fpr2
1.55928297603358e-169	2.95993	0.794	0.22	2.46818902276355e-165	6	CN-M2	Col6a3
1.58652558705971e-75	2.95398	0.458	0.072	2.51131135175682e-71	12	HEP2	Cyp4a12b
1.14914802420372e-120	2.95179	0.731	0.109	1.81898640751206e-116	14	rep HEP	Eif2s3y
4.26510395526112e-131	2.95171	0.925	0.507	6.75123305078283e-127	2	HEP0	Mup17
9.15561417581137e-105	2.94549	0.389	0.062	1.44924216788918e-100	6	CN-M2	Mrc2
9.21358847282505e-58	2.94496	0.469	0.151	1.45841891936348e-53	8	CN-M1	Isg20
3.65092012761677e-113	2.94282	0.939	0.284	5.77904147000458e-109	13	EC1	Pdia4
3.54669282453484e-170	2.93944	0.78	0.144	5.6140600719562e-166	9	CN	Adam8
5.02639367982847e-101	2.93364	0.367	0.057	7.95627855580048e-97	6	CN-M2	Adam19
4.71869428842797e-38	2.93077	0.481	0.199	7.46922118915263e-34	8	CN-M1	Ccl3
1.51422658312563e-199	2.93024	0.846	0.135	2.39686925842956e-195	10	EC2	mt-Atp8
2.04152820021633e-88	2.92988	0.322	0.05	3.23153498812242e-84	6	CN-M2	Kdelr3
1.79541314586845e-73	2.92965	0.481	0.073	2.84195946859518e-69	14	rep HEP	Cyp4a12b
7.06650398215521e-82	2.92865	0.31	0.062	1.11855691533535e-77	2	HEP0	Cyp2b13
2.0381359490836e-69	2.92236	0.545	0.103	3.22616539380443e-65	14	rep HEP	Rrm2
1.20516719714186e-116	2.9218	0.436	0.071	1.90765915635585e-112	6	CN-M2	Ehd2
1.37011944501485e-107	2.92075	0.89	0.251	2.168762069514e-103	13	EC1	Dnajb9
7.35101171324332e-137	2.91943	1	0.939	1.16359164408928e-132	9	CN	Lyz2
4.12045267681884e-76	2.91831	0.538	0.09	6.52226454213655e-72	14	rep HEP	Lockd
1.10871925692718e-88	2.91696	1	0.565	1.75499171179004e-84	14	rep HEP	Gstm3
1.16810298708967e-184	2.91452	0.862	0.16	1.84899021826424e-180	10	EC2	mt-Nd4l
1.4576773961956e-56	2.91373	0.541	0.215	2.30735755043801e-52	8	CN-M1	Ero1l
5.36035217631201e-145	2.91353	0.556	0.097	8.48490145988428e-141	6	CN-M2	Ltbp2
1.38417174721062e-56	2.91337	0.562	0.225	2.19100545865969e-52	8	CN-M1	Gadd45b
2.86772351007149e-58	2.91225	0.363	0.057	4.53931954409217e-54	12	HEP2	Hsd3b5
5.52003555221911e-145	2.91178	0.533	0.089	8.73766427560763e-141	6	CN-M2	Lat2
6.00618083067301e-94	2.90876	0.737	0.15	9.50718363687231e-90	14	rep HEP	Spc24
5.68924455299649e-246	2.90614	0.974	0.363	9.00550520293815e-242	3	HEP4	Cyp4a14
3.76297252569481e-175	2.905	0.939	0.261	5.95640921092232e-171	9	CN	Clec4d
9.08115455351478e-113	2.9049	0.444	0.078	1.43745595427585e-108	6	CN-M2	Mmp23
3.09694710718517e-42	2.90436	0.888	0.312	4.90215757596341e-38	15	OG	Hbb-bt
1.52117982543144e-127	2.90388	0.569	0.122	2.40787554567542e-123	6	CN-M2	Ckap4
1.05495143719475e-55	2.89908	0.423	0.075	1.66988262993557e-51	14	rep HEP	Racgap1
5.76027047789806e-100	2.8933	0.314	0.04	9.11793213946483e-96	6	CN-M2	Meg3
6.19724888013742e-92	2.88905	1	0.66	9.80962525236953e-88	14	rep HEP	Fam25c
2.29756505065341e-75	2.87886	0.534	0.17	3.63681571867928e-71	8	CN-M1	Calhm6
7.67792553203467e-101	2.8787	0.433	0.082	1.21533883246577e-96	6	CN-M2	Loxl2
5.82927739067238e-65	2.87563	0.275	0.049	9.22716318169531e-61	6	CN-M2	Plxdc2
6.99232830933559e-98	2.87529	1	0.567	1.10681564808473e-93	14	rep HEP	Cyp2d9
1.84871452489851e-88	2.87259	0.707	0.152	2.92633022146184e-84	13	EC1	A1bg
1.04745436891218e-82	2.87093	0.547	0.159	1.65801552055108e-78	8	CN-M1	Socs1
1.49011190671315e-117	2.87019	0.453	0.076	2.35869813713625e-113	6	CN-M2	Loxl3
8.98135789910531e-97	2.86754	0.339	0.05	1.42165914184938e-92	6	CN-M2	Chst11
1.23254860654759e-77	2.8671	0.319	0.056	1.95100118930418e-73	6	CN-M2	Fbln1
2.12110346886105e-76	2.86472	0.307	0.041	3.35749468086016e-72	9	CN	Cav1
4.95629766034915e-162	2.86321	0.609	0.134	7.84532356656667e-158	3	HEP4	Cyp2c69
2.94845823933018e-35	2.86139	0.348	0.049	4.66711454703573e-31	15	OG	Cyp1b1
5.78574258845073e-141	2.85949	0.575	0.112	9.15825194325865e-137	6	CN-M2	Myof
4.0140609939358e-134	2.85321	0.906	0.297	6.35385714730097e-130	10	EC2	Malat1
2.58737271666162e-122	2.85182	0.572	0.129	4.09555227320368e-118	6	CN-M2	Loxl1
1.54623439452937e-155	2.84927	0.725	0.174	2.44753442310055e-151	6	CN-M2	Trem2
6.48598224860305e-113	2.84523	0.456	0.081	1.02666613013138e-108	6	CN-M2	Thy1
3.71492369727164e-47	2.83264	0.346	0.058	5.88035272041128e-43	14	rep HEP	Ckap2
1.50126579863395e-127	2.82837	0.492	0.085	2.37635363265769e-123	6	CN-M2	Creb3l1
2.34980498405569e-100	2.82695	0.422	0.078	3.71950630926176e-96	6	CN-M2	P3h3
8.08514143706457e-96	2.82617	0.891	0.258	1.27979703807295e-91	14	rep HEP	Akr1c19
1.77735755582226e-95	2.82535	0.481	0.086	2.81337927511105e-91	9	CN	Mmp8
8.19017037695244e-106	2.82531	0.853	0.192	1.2964220689678e-101	14	rep HEP	Acacb
9.35631172165573e-94	2.82487	0.469	0.108	1.48101058242089e-89	6	CN-M2	Myl9
1.2841212596879e-128	2.8236	0.564	0.116	2.03263554195998e-124	6	CN-M2	C1qtnf6
6.15574225726924e-99	2.82265	0.348	0.061	9.74392441903148e-95	3	HEP4	Sult2a1
8.91666767197301e-104	2.8212	0.431	0.079	1.41141932579661e-99	6	CN-M2	Gpx8
4.66438521950206e-127	2.81962	0.583	0.097	7.38325536394981e-123	9	CN	Il1f9
7.22930270575599e-56	2.81216	0.369	0.061	1.14432632529412e-51	12	HEP2	Gm32468
4.36486771766226e-102	2.81152	1	0.524	6.90914911028759e-98	14	rep HEP	Orm3
2.29734905248814e-68	2.81015	0.531	0.178	3.63647381518348e-64	8	CN-M1	Gbp4
9.95334362034986e-92	2.80972	0.724	0.146	1.57551476166518e-87	14	rep HEP	Car14
1.20924135221112e-66	2.79884	0.253	0.04	1.91410813641498e-62	6	CN-M2	Tspan6
2.31238461144143e-53	2.79549	0.989	0.582	3.66027360145064e-49	15	OG	Lgals1
6.49805163748113e-197	2.79482	0.667	0.127	1.02857659369689e-192	3	HEP4	Cyp2a4
7.49016362266989e-75	2.7947	0.635	0.132	1.18561799983242e-70	14	rep HEP	Slc22a7
4.78910769305506e-101	2.78798	0.397	0.067	7.58067856733685e-97	6	CN-M2	Trac
1.05574137013725e-141	2.78746	0.644	0.143	1.67113301479026e-137	6	CN-M2	Col6a1
1.22700399789879e-98	2.78736	0.974	0.402	1.94222462827399e-94	14	rep HEP	1810008I18Rik
1.6225154859559e-79	2.78538	0.283	0.042	2.5682797627196e-75	6	CN-M2	Cacnb3
5.08341425633298e-103	2.78409	0.97	0.413	8.04653642634947e-99	13	EC1	Prg4
8.01162125892791e-127	2.78004	0.669	0.188	1.2681595290757e-122	6	CN-M2	Rcn1
1.50687506325459e-51	2.77775	0.559	0.23	2.3852325376257e-47	8	CN-M1	Plek
3.90639652240148e-115	2.77648	0.497	0.098	6.18343505530931e-111	6	CN-M2	Tpm2
4.10175709801918e-64	2.77236	0.272	0.049	6.49267131045457e-60	6	CN-M2	Cxcr6
2.39472658595178e-42	2.76461	0.34	0.061	3.79061271290307e-38	14	rep HEP	Cyp2c55
2.63250190693166e-115	2.764	0.788	0.24	4.16698726848212e-111	9	CN	Fpr1
1.50733785378461e-92	2.76297	0.432	0.109	2.38596508875565e-88	2	HEP0	Mup12
2.573036387121e-150	2.76262	1	0.552	4.07285929717383e-146	10	EC2	mt-Nd3
7.52334057168368e-106	2.76187	0.686	0.233	1.19086957909181e-101	6	CN-M2	Mmp2
2.02842060845477e-98	2.75904	0.705	0.122	3.21078698112306e-94	14	rep HEP	Cyp4a12a
1.74862142020983e-121	2.75421	0.656	0.186	2.76789284605014e-117	6	CN-M2	Lamb1
7.78648377986274e-58	2.75163	0.423	0.07	1.23252251751447e-53	14	rep HEP	Mad2l1
3.6244073043576e-111	2.74986	0.894	0.231	5.73707432206765e-107	12	HEP2	Lhpp
1.24353590883153e-79	2.74882	0.306	0.049	1.96839299008943e-75	6	CN-M2	Myo5a
1.11973466165936e-171	2.74524	0.947	0.362	1.77242799594059e-167	6	CN-M2	Pf4
2.79143114810076e-94	2.74416	0.431	0.087	4.41855636432869e-90	6	CN-M2	Nxn
7.77233278010102e-91	2.74416	0.483	0.117	1.23028255576219e-86	6	CN-M2	Ccn2
9.06688123944804e-97	2.73748	0.981	0.447	1.43519663139223e-92	14	rep HEP	Me1
9.85228097899337e-85	2.73667	0.769	0.179	1.55951755616486e-80	14	rep HEP	Ube2c
4.48288625780791e-22	2.73544	0.326	0.065	7.09596065748413e-18	15	OG	Vwf
6.43846064050181e-188	2.73216	0.981	0.47	1.01914393478503e-183	6	CN-M2	Cd63
9.93446419610793e-59	2.73171	0.528	0.068	1.57252633760192e-54	15	OG	Cthrc1
2.03142009899239e-76	2.72959	0.392	0.086	3.21553487469505e-72	6	CN-M2	Ccl21a
5.55398513612856e-234	2.72595	0.97	0.398	8.79140307197789e-230	3	HEP4	Cyp4a10
2.69726346790679e-26	2.72366	0.258	0.036	4.26949834334965e-22	15	OG	Cpe
1.22032860124952e-72	2.72294	0.275	0.043	1.93165814291787e-68	6	CN-M2	Arhgef25
6.32469864288278e-112	2.71819	0.958	0.671	1.00113654818191e-107	6	CN-M2	Ccl6
6.88159451525058e-14	2.71769	0.709	0.832	1.08928759581901e-09	8	CN-M1	S100a8
1.16496467304523e-35	2.71618	0.288	0.052	1.8440225809633e-31	14	rep HEP	Prc1
1.86926350783438e-20	2.71575	0.258	0.046	2.95885720655104e-16	15	OG	Pcdh17
1.21930775667155e-151	2.71437	0.875	0.234	1.9300422480354e-147	9	CN	Capg
4.42363367863067e-74	2.71137	0.317	0.057	7.00216974990449e-70	6	CN-M2	Htra3
4.23571060244894e-38	2.71	0.306	0.089	6.70470631261643e-34	8	CN-M1	Arg2
6.14425788599721e-81	2.7061	0.422	0.097	9.72574580774499e-77	6	CN-M2	Col16a1
2.57526777672365e-78	2.70514	0.603	0.123	4.07639136377587e-74	12	HEP2	Cyp4a12a
1.02365877491022e-99	2.70382	0.489	0.108	1.62034947480539e-95	6	CN-M2	Phlda3
1.05715323620744e-97	2.7004	0.994	0.593	1.67336785759276e-93	14	rep HEP	Tkfc
1.66941670384195e-129	2.69865	0.507	0.105	2.64251970051142e-125	3	HEP4	Sult2a2
4.96439278180465e-81	2.69773	0.378	0.076	7.85813733431858e-77	6	CN-M2	Chpf
6.29956482123858e-99	2.69722	0.592	0.169	9.97158115553856e-95	6	CN-M2	Cpxm1
8.61301614417201e-157	2.69684	0.984	0.357	1.36335432546099e-152	10	EC2	mt-Nd5
5.99340959599197e-165	2.69657	0.864	0.291	9.48696804949568e-161	6	CN-M2	Anxa1
1.25515296302207e-107	2.69427	0.456	0.085	1.98678162516764e-103	6	CN-M2	Plp2
1.36343066776403e-106	2.68305	0.494	0.104	2.15817440400369e-102	6	CN-M2	Pdgfra
9.379963874867e-14	2.68017	0.378	0.237	1.4847544817527e-09	8	CN-M1	Gdf15
5.78235529364756e-117	2.68015	0.617	0.162	9.15289019431472e-113	6	CN-M2	Tspan3
1.5444456705281e-30	2.67969	0.259	0.076	2.44470305187893e-26	8	CN-M1	Slc7a11
1.11248562638442e-33	2.67942	0.438	0.08	1.7609534980039e-29	15	OG	Rasl11a
8.47582379141054e-51	2.67567	0.41	0.075	1.34163814794237e-46	14	rep HEP	Ccnb2
2.46839981276312e-64	2.67347	0.528	0.182	3.90723006362274e-60	8	CN-M1	Tnfaip3
2.83450498104884e-53	2.67346	0.422	0.129	4.48673793450221e-49	8	CN-M1	Ppp1r15a
1.69580878901037e-96	2.67209	0.981	0.424	2.68429573212451e-92	14	rep HEP	Ttc39c
2.81745580927977e-60	2.6718	0.575	0.138	4.45975080050895e-56	12	HEP2	Fitm1
3.63795009187662e-15	2.6717	0.722	0.879	5.7585112004315e-11	8	CN-M1	S100a9
5.85143197236241e-140	2.67016	0.744	0.214	9.26223166905246e-136	6	CN-M2	Efemp2
5.66888772244892e-65	2.66994	0.506	0.173	8.9732823758644e-61	6	CN-M2	Ccl19
1.27639734252762e-69	2.66754	0.294	0.052	2.02040935348697e-65	6	CN-M2	Pqlc3
6.4227551375393e-48	2.66696	0.385	0.07	1.0166579107211e-43	14	rep HEP	Gnat1
2.38740336524209e-97	2.66546	1	0.748	3.77902078684171e-93	14	rep HEP	Nudt7
1.47058813666051e-48	2.66297	0.281	0.063	2.32779396151992e-44	8	CN-M1	Tgtp1
1.72554783481472e-101	2.66185	0.439	0.083	2.73136966772822e-97	6	CN-M2	Sh3pxd2b
4.35111099161001e-35	2.66147	0.276	0.048	6.88737358861948e-31	14	rep HEP	Nusap1
2.55323005784626e-41	2.66058	0.694	0.483	4.04150785856484e-37	8	CN-M1	Il1rn
5.00580022843305e-140	2.65873	1	0.889	7.92368118158668e-136	10	EC2	mt-Nd2
1.12790883436429e-87	2.6573	0.451	0.081	1.78536689391524e-83	9	CN	Stfa2l1
4.26112348599846e-71	2.65708	0.356	0.076	6.74493236598696e-67	6	CN-M2	Trbc1
4.18088133232286e-75	2.65439	0.677	0.158	6.61791706093385e-71	13	EC1	Gm26917
9.39271530714106e-87	2.65434	0.394	0.077	1.48677290596736e-82	6	CN-M2	Mdk
8.96962121198695e-96	2.65428	1	0.892	1.41980134164541e-91	13	EC1	Mt2
4.77254694064073e-123	2.64987	0.639	0.162	7.55446455234021e-119	6	CN-M2	Pdgfrb
2.84340125451001e-92	2.64965	1	0.844	4.50081984576389e-88	14	rep HEP	Fasn
1.17839978426129e-65	2.64952	0.303	0.059	1.8652890185072e-61	6	CN-M2	Islr
9.27388753321132e-73	2.64804	0.647	0.143	1.46796365763202e-68	14	rep HEP	Pklr
3.07285845622187e-40	2.6474	0.259	0.062	4.86402765035359e-36	8	CN-M1	Angpt2
1.57045853084416e-60	2.6472	0.3	0.062	2.48587880847322e-56	6	CN-M2	Ccn5
1.29435829054856e-51	2.64629	0.419	0.135	2.04883973810931e-47	8	CN-M1	Atf3
6.01320534525352e-55	2.64194	0.966	0.351	9.5183027410018e-51	15	OG	Ccdc80
9.8367002680801e-69	2.6418	0.278	0.047	1.5570512854344e-64	6	CN-M2	Fhl2
9.41812733875801e-56	2.64141	0.362	0.093	1.49079537645201e-51	8	CN-M1	Gbp9
2.1647428997087e-96	2.63982	0.904	0.263	3.42657153594891e-92	14	rep HEP	Prtn3
2.57337225633925e-34	2.63946	0.438	0.078	4.0733909445594e-30	15	OG	Mrc2
9.04786835309667e-61	2.63803	0.256	0.045	1.43218708161167e-56	6	CN-M2	Tmem132a
1.54075083774335e-79	2.63716	0.597	0.157	2.43885450106394e-75	11	NC-P	Hcar2
2.22568769908988e-133	2.63415	1	0.91	3.52304105888937e-129	10	EC2	mt-Co2
9.53782256167338e-93	2.63374	0.439	0.091	1.50974193328728e-88	6	CN-M2	Dkk3
8.70579639467197e-29	2.63124	0.731	0.714	1.37804051131263e-24	8	CN-M1	Plac8
2.92583082405546e-41	2.62766	0.269	0.066	4.63129761139739e-37	8	CN-M1	Elf3
3.67448533783027e-49	2.62764	0.264	0.045	5.81634284125154e-45	10	EC2	Elane
5.43383908092934e-49	2.62732	0.497	0.192	8.60122388120306e-45	8	CN-M1	Cdkn1a
5.1939003237511e-34	2.62662	0.474	0.143	8.22142482246562e-30	14	rep HEP	Fitm1
1.51137208582692e-89	2.62348	1	0.772	2.39235087465543e-85	12	HEP2	Oat
3.48489078763053e-47	2.62229	0.341	0.092	5.51623362774037e-43	8	CN-M1	Ifit1
1.02312433008901e-132	2.61855	0.881	0.408	1.61950350209789e-128	6	CN-M2	Lum
3.39454302572189e-67	2.61822	0.289	0.052	5.37322215541518e-63	6	CN-M2	Unc5b
2.59493363170954e-38	2.61659	0.276	0.044	4.10752044563303e-34	14	rep HEP	Chaf1a
7.88028398036856e-59	2.61327	0.314	0.07	1.24737015125254e-54	6	CN-M2	Fzd1
4.47825220987982e-37	2.61135	1	0.771	7.08862542301877e-33	15	OG	Hbb-bs
1.16531916466885e-72	2.61097	0.392	0.092	1.84458370575433e-68	6	CN-M2	Cd3g
5.69625672577202e-105	2.61009	0.581	0.151	9.01660477122453e-101	6	CN-M2	Tagln
3.26655701206706e-55	2.60619	0.462	0.156	5.17063309440095e-51	8	CN-M1	Gbp6
4.89995551043527e-78	2.60391	0.356	0.069	7.75613957746799e-74	6	CN-M2	Fgfr1
1.16794801635396e-21	2.60209	0.27	0.047	1.84874491508668e-17	15	OG	Ccbe1
4.55061012368233e-50	2.60064	1	0.851	7.20316076477676e-46	15	OG	mt-Nd1
8.92119139441386e-136	2.60052	0.653	0.153	1.41213538582177e-131	6	CN-M2	C3ar1
6.15954997236465e-86	2.59069	0.55	0.161	9.74995165125601e-82	6	CN-M2	Mxra8
5.93926760273321e-161	2.59048	0.839	0.25	9.40126668836639e-157	6	CN-M2	Ms4a7
4.12104497047076e-47	2.59022	0.417	0.083	6.52320208375816e-43	14	rep HEP	Klk1b4
8.42799206843429e-61	2.58757	0.275	0.051	1.33406686451246e-56	6	CN-M2	Itm2a
1.1691540242709e-61	2.58662	0.358	0.089	1.85065390501841e-57	6	CN-M2	Fkbp7
2.14733390601713e-54	2.58592	0.303	0.056	3.39901483983452e-50	9	CN	Pqlc3
4.62351149119492e-48	2.58464	0.278	0.066	7.31855633941244e-44	6	CN-M2	Ccl12
2.04012067171531e-97	2.58455	0.447	0.07	3.22930701125816e-93	9	CN	Pdpn
9.84693479542702e-100	2.58418	0.672	0.161	1.55867130876814e-95	11	NC-P	Cxcl3
2.31658420121851e-73	2.57676	0.344	0.068	3.66692113210878e-69	6	CN-M2	Lat
1.16919824255447e-125	2.57663	0.722	0.214	1.85072389813948e-121	6	CN-M2	Pcolce
1.65705605221998e-117	2.57647	0.572	0.13	2.62295402505901e-113	6	CN-M2	Glipr1
1.76703709334912e-151	2.5764	0.817	0.254	2.79704301506232e-147	6	CN-M2	Timp2
4.12771050467644e-46	2.57434	0.341	0.093	6.53375295785234e-42	8	CN-M1	Trem1
1.3169178321399e-71	2.57301	0.281	0.045	2.08454923649424e-67	6	CN-M2	Rab11fip5
2.51481425490486e-83	2.57156	1	0.652	3.9806994840889e-79	14	rep HEP	Cyp1a2
2.0063914347676e-36	2.57126	0.288	0.05	3.17591700209364e-32	14	rep HEP	Spata24
9.32335378975242e-57	2.57001	0.615	0.162	1.47579367137991e-52	14	rep HEP	Gm14403
2.1007469431375e-109	2.5688	0.669	0.149	3.32527233629234e-105	10	EC2	Gm26917
5.56832511253965e-70	2.56824	0.25	0.043	8.81410182063901e-66	3	HEP4	Fmo3
9.17117055077144e-133	2.5676	1	0.95	1.45170458648161e-128	10	EC2	mt-Atp6
9.40399153290794e-117	2.56517	0.667	0.193	1.488557819744e-112	6	CN-M2	Selenom
3.65367562576034e-26	2.56398	0.403	0.187	5.78340314801605e-22	8	CN-M1	Smox
4.67481117304997e-74	2.56359	0.342	0.066	7.3997586058208e-70	6	CN-M2	Ptgfrn
9.54874902577602e-83	2.56196	0.394	0.081	1.51147148329009e-78	6	CN-M2	Plxna1
1.40774780161739e-75	2.56037	0.774	0.226	2.22832399518017e-71	13	EC1	Cyp17a1
3.66953578381384e-100	2.55639	0.431	0.08	5.80850819219893e-96	6	CN-M2	Pik3r5
9.58245970545616e-97	2.55516	0.97	0.464	1.51680754677666e-92	13	EC1	Creld2
2.71635755505349e-89	2.55158	0.936	0.303	4.29972237389417e-85	14	rep HEP	Adh4
2.44850514238764e-100	2.55103	0.589	0.166	3.8757387898854e-96	6	CN-M2	Adamts2
6.68265755432937e-102	2.54932	0.461	0.092	1.0577978642748e-97	6	CN-M2	Hvcn1
4.85148163010554e-66	2.54832	0.281	0.049	7.67941027229406e-62	6	CN-M2	Gpr132
5.21000722925008e-92	2.54822	0.987	0.571	8.24692044317995e-88	14	rep HEP	Ugdh
5.51639113959986e-77	2.54813	0.78	0.229	8.73189553487262e-73	13	EC1	Vnn1
1.51696735516804e-84	2.54754	0.732	0.179	2.4012076264955e-80	12	HEP2	Slc1a2
1.34095431810203e-137	2.54454	0.864	0.352	2.1225965901237e-133	6	CN-M2	Ctla2a
1.73661595258978e-67	2.54405	0.622	0.135	2.74888939135437e-63	14	rep HEP	Pdzk1ip1
8.23684540724402e-39	2.5436	0.317	0.059	1.30381025951266e-34	13	EC1	Hist1h4h
2.28032723757323e-91	2.54163	0.885	0.25	3.60952998435466e-87	14	rep HEP	Tpmt
1.99504026164071e-64	2.54092	0.281	0.062	3.15794923015107e-60	1	HEP1	Spink1
1.43387236674752e-79	2.53896	0.891	0.291	2.26967656932465e-75	14	rep HEP	Stmn1
3.23739494884074e-43	2.53879	0.397	0.081	5.12447246452002e-39	14	rep HEP	Tcf19
9.49643441753443e-150	2.53844	0.972	0.686	1.50319060395152e-145	6	CN-M2	Bgn
3.73059450545917e-61	2.53714	0.564	0.121	5.90515804269132e-57	14	rep HEP	Rnd2
5.76654001036244e-77	2.53617	0.272	0.04	9.12785618240271e-73	6	CN-M2	Serpinb2
2.05257766340869e-82	2.53615	0.397	0.082	3.24902518340962e-78	6	CN-M2	Runx1
5.46861254979086e-72	2.53456	0.406	0.099	8.65626680506395e-68	6	CN-M2	Gpx7
6.04605064537593e-48	2.53098	0.284	0.056	9.57029356656556e-44	9	CN	Pik3cg
2.32812988177559e-78	2.52822	0.364	0.072	3.68519678986258e-74	6	CN-M2	Rassf2
1.95208963138219e-82	2.52741	0.456	0.112	3.08996267751487e-78	6	CN-M2	Gas1
8.14212524654508e-24	2.52444	0.326	0.06	1.28881700527562e-19	15	OG	Plxdc2
2.22731559314237e-20	2.52444	0.303	0.061	3.52561785238505e-16	15	OG	Nat8f5
1.89854779389471e-88	2.52426	0.469	0.11	3.00521130295594e-84	6	CN-M2	Scarf2
3.36399717667397e-168	2.52388	0.983	0.638	5.32487113095723e-164	6	CN-M2	Col4a1
8.26181419201357e-50	2.52343	0.256	0.054	1.30776256845383e-45	6	CN-M2	Fkbp14
1.53934978784917e-66	2.52122	0.367	0.068	2.43663677918646e-62	9	CN	Mcub
3.35694190974423e-58	2.51874	0.497	0.156	5.31370334893415e-54	8	CN-M1	Hcar2
9.13816031505975e-58	2.51855	0.314	0.071	1.44647939627081e-53	6	CN-M2	Itgax
2.36250951858451e-94	2.51792	1	0.839	3.73961631696742e-90	14	rep HEP	Sc5d
6.32797356078686e-147	2.51619	0.797	0.236	1.00165493493695e-142	6	CN-M2	Olfml3
4.51365936619379e-137	2.5156	1	0.991	7.14467141074815e-133	9	CN	Tmsb4x
3.41760423888269e-27	2.51454	0.782	0.516	5.40972574972741e-23	14	rep HEP	Cyp2a5
3.24344600183782e-107	2.51452	0.639	0.187	5.13405067630908e-103	6	CN-M2	Crtap
4.27967684140867e-53	2.51355	0.281	0.061	6.77430047226579e-49	6	CN-M2	Susd3
6.97045868318039e-58	2.51345	0.286	0.058	1.10335390496062e-53	6	CN-M2	Angpt2
2.52683756864261e-39	2.51334	0.261	0.057	3.99973118740438e-35	9	CN	Clmp
4.52023058312558e-122	2.512	0.655	0.129	7.15507299002948e-118	9	CN	Bst1
1.60486500887965e-79	2.5113	0.458	0.117	2.54034082255559e-75	6	CN-M2	Nrep
2.82839051443843e-97	2.51062	1	0.677	4.47705934530459e-93	14	rep HEP	Aldh1a7
5.05215333673598e-58	2.5101	0.538	0.115	7.99705351671939e-54	14	rep HEP	Cyp2r1
5.97776208110676e-66	2.50919	0.35	0.079	9.46219959818389e-62	6	CN-M2	Lxn
2.39899180457622e-27	2.50564	0.412	0.186	3.79736412746369e-23	8	CN-M1	Thbs1
1.29393276001141e-79	2.50515	0.411	0.091	2.04816616582206e-75	6	CN-M2	Ctps
6.20532569732011e-17	2.50194	0.315	0.077	9.822410046288e-13	15	OG	Chrna4
9.18889336254362e-41	2.50134	0.497	0.222	1.45450993035703e-36	8	CN-M1	Slc2a1
1.88524814549462e-110	2.49991	0.686	0.161	2.98415928950343e-106	9	CN	C3ar1
1.91492566776687e-149	2.49857	0.947	0.542	3.03113583950817e-145	6	CN-M2	Col4a2
2.1609845508913e-62	2.49832	0.358	0.087	3.42062244560584e-58	6	CN-M2	Cd34
4.03423349021025e-42	2.49787	0.685	0.17	6.3857881916538e-38	15	OG	Snhg18
1.47208534133334e-87	2.49496	0.776	0.17	2.33016388679655e-83	14	rep HEP	Cdk1
5.4857935702629e-52	2.49437	0.434	0.136	8.68346264236914e-48	8	CN-M1	Slc16a3
3.10604009489916e-127	2.49412	0.943	0.433	4.91655086621589e-123	9	CN	Marcksl1
8.56895565568675e-86	2.49234	0.467	0.111	1.35637999073866e-81	6	CN-M2	Gpr137b
1.96777930041354e-56	2.49002	0.267	0.052	3.11479785462459e-52	6	CN-M2	Atp8b2
4.97827731568309e-44	2.48784	0.989	0.738	7.88011516299476e-40	15	OG	Col3a1
6.8460862515738e-56	2.4868	0.667	0.194	1.08366699276162e-51	14	rep HEP	Mcm6
5.27895064481054e-87	2.48391	0.987	0.531	8.35605097567061e-83	14	rep HEP	Ugt2b35
3.95790613143757e-138	2.4832	0.751	0.26	6.26496961545252e-134	2	HEP0	Mup16
7.18494577132543e-54	2.48306	0.516	0.19	1.1373050661431e-49	8	CN-M1	Pim1
6.94279918260091e-71	2.48113	0.431	0.113	1.0989756826139e-66	6	CN-M2	Nid2
1.05475017530389e-39	2.47733	0.353	0.068	1.66956405248853e-35	14	rep HEP	Rfc4
1.95124997500163e-29	2.47639	0.256	0.049	3.08863358543008e-25	14	rep HEP	Anln
2.86658486512948e-43	2.47509	0.34	0.059	4.53751718301345e-39	14	rep HEP	Mup18
7.39933882862075e-76	2.47048	0.394	0.087	1.17124134318238e-71	6	CN-M2	Dram1
1.66399885548032e-109	2.46959	0.459	0.099	2.6339437883398e-105	3	HEP4	Slc16a5
8.01075361573625e-25	2.46843	0.659	0.512	1.26802218983489e-20	8	CN-M1	Ccl5
1.84780675478082e-49	2.4683	0.933	0.314	2.92489331214256e-45	15	OG	Emilin1
1.27905767708131e-32	2.46828	0.346	0.079	2.024620397052e-28	14	rep HEP	Gemin6
2.40692563668079e-92	2.46773	0.456	0.098	3.80992259030202e-88	6	CN-M2	Ltbp3
3.64545083919774e-151	2.46766	0.872	0.312	5.7703841333661e-147	6	CN-M2	Tuba1a
5.17362492624231e-95	2.46756	1	0.999	8.18933089574895e-91	14	rep HEP	Mgst1
3.71816252381375e-73	2.46647	0.737	0.187	5.88547945894479e-69	14	rep HEP	Mkrn2os
1.53874280080737e-97	2.46318	1	0.983	2.43567597939799e-93	14	rep HEP	H2-Q10
1.52144852892781e-65	2.46233	0.356	0.081	2.40830087643983e-61	6	CN-M2	Slc37a2
2.00212860705929e-44	2.46062	0.483	0.073	3.16916937211416e-40	15	OG	Ly6c1
1.5667522854206e-107	2.46015	0.444	0.079	2.48001219259227e-103	6	CN-M2	Smim3
1.05679368783819e-59	2.45941	0.615	0.151	1.67279872847908e-55	14	rep HEP	Birc5
5.50197048055483e-52	2.45849	0.275	0.06	8.70906907367023e-48	6	CN-M2	Src
8.89553711439659e-13	2.45733	0.281	0.079	1.40807456983784e-08	15	OG	Spink1
5.69039018819906e-28	2.45686	0.944	0.526	9.0073186289003e-24	15	OG	Hba-a2
7.14536176635917e-134	2.45654	0.78	0.186	1.13103931399699e-129	9	CN	Ccl3
3.84104993486809e-76	2.45565	0.776	0.2	6.0799979419027e-72	14	rep HEP	Cenpa
8.46543468849113e-96	2.45444	1	0.994	1.33999365684126e-91	14	rep HEP	Dbi
7.67749871095799e-81	2.45388	0.955	0.473	1.21527127095754e-76	14	rep HEP	Aqp8
5.15643983261485e-133	2.45356	1	0.846	8.16212861104605e-129	10	EC2	mt-Nd1
1.07485621463956e-38	2.45337	0.764	0.237	1.70138990215297e-34	15	OG	Dnajc12
5.22638462508519e-39	2.45207	0.291	0.079	8.27284422304734e-35	8	CN-M1	Cd40
1.68943837159362e-36	2.45195	0.333	0.066	2.67421199839554e-32	14	rep HEP	Gins2
2.0185421292497e-45	2.45171	0.865	0.272	3.19515033638935e-41	15	OG	Prtn3
2.50853992076011e-30	2.45121	0.263	0.049	3.97076784057117e-26	14	rep HEP	Smpd3
1.07268632994548e-26	2.45049	0.28	0.065	1.69795519167071e-22	13	EC1	Rcan2
4.69517909827662e-113	2.44844	0.839	0.407	7.43199899466206e-109	2	HEP0	Mup7
4.14131886815686e-86	2.44787	0.47	0.089	6.5552936364055e-82	9	CN	Trem1
8.61230820071065e-98	2.44703	0.644	0.16	1.36324226509049e-93	9	CN	C5ar1
3.17024419395903e-27	2.44665	0.282	0.062	5.01817953461775e-23	14	rep HEP	Nup43
1.68261455589052e-37	2.44451	0.372	0.08	2.6634105805191e-33	14	rep HEP	Hnf4aos
1.18847974709875e-32	2.44418	0.404	0.069	1.88124459168261e-28	15	OG	Col12a1
6.70272666183502e-70	2.44217	0.356	0.076	1.06097460330187e-65	6	CN-M2	Cd3d
2.3005694230674e-30	2.44188	0.253	0.074	3.64157133977339e-26	8	CN-M1	Tiparp
1.73795028106041e-64	2.44114	0.319	0.066	2.75100149989053e-60	6	CN-M2	Mcub
2.50921881630288e-59	2.44097	0.328	0.075	3.97184246432583e-55	6	CN-M2	Tgfb1i1
2.68520028704825e-164	2.44047	0.822	0.225	4.25040353436868e-160	6	CN-M2	Capg
1.22856789549555e-169	2.43951	0.706	0.137	1.9447001217799e-165	6	CN-M2	Adam8
1.6778347662739e-74	2.43848	0.795	0.229	2.65584465153495e-70	14	rep HEP	Dnajc12
1.4267120997988e-26	2.43834	0.276	0.061	2.25834258277153e-22	14	rep HEP	Gm13203
1.17497680157952e-41	2.43728	0.254	0.051	1.85987077922022e-37	9	CN	Tmem119
1.23003689060926e-79	2.43599	0.405	0.07	1.9470253941454e-75	9	CN	Slc7a11
1.33135913641383e-131	2.43432	1	0.891	2.10740837702944e-127	10	EC2	mt-Nd4
6.86511982352338e-27	2.43395	0.921	0.545	1.08667981686552e-22	15	OG	Hba-a1
1.63217503230405e-44	2.43365	0.487	0.119	2.58356985863407e-40	14	rep HEP	Eppk1
2.31855312004474e-45	2.43318	0.417	0.084	3.67003773371882e-41	14	rep HEP	Scara5
1.43844492404637e-76	2.43227	0.47	0.099	2.276914470273e-72	9	CN	Hvcn1
1.66045089508877e-201	2.43131	0.815	0.219	2.62832772183601e-197	3	HEP4	Cyp2b9
6.34957337256208e-37	2.4282	0.303	0.089	1.00507396914285e-32	8	CN-M1	Lmnb1
1.69279057490108e-93	2.42722	0.517	0.129	2.67951820101092e-89	6	CN-M2	Fscn1
1.68517255144549e-45	2.42599	0.694	0.487	2.66745963168307e-41	8	CN-M1	Ifi47
1.53180679422717e-26	2.4254	0.263	0.055	2.42469697458219e-22	14	rep HEP	Arhgap11a
1.92140395486587e-49	2.4241	1	0.975	3.04139032015719e-45	15	OG	mt-Co3
1.92469376975513e-74	2.42368	0.833	0.258	3.04659776814539e-70	14	rep HEP	Abcg2
2.2614910270754e-76	2.42089	0.394	0.087	3.57971414675765e-72	6	CN-M2	Rftn1
2.78517650041285e-58	2.42045	0.459	0.143	4.4086558825035e-54	8	CN-M1	Crybb3
3.91119823844516e-89	2.42027	1	0.935	6.19103569163484e-85	14	rep HEP	Saa1
2.29813516086303e-18	2.41991	0.281	0.058	3.6377181461301e-14	15	OG	Dpt
2.15342529994219e-40	2.41904	0.312	0.086	3.4086569072785e-36	8	CN-M1	Stfa2l1
1.77391631120875e-92	2.41878	1	0.756	2.80793212901233e-88	14	rep HEP	Tubb4b
2.02251385734937e-98	2.41607	0.994	0.966	3.20143718479832e-94	13	EC1	Hspa5
1.45139867010339e-98	2.41559	0.453	0.09	2.29741895490666e-94	6	CN-M2	Gm21188
1.27499516537872e-23	2.41171	0.416	0.098	2.01818984727798e-19	15	OG	Gucy1a1
3.6852522598611e-49	2.41163	0.551	0.14	5.83338580213414e-45	14	rep HEP	Cenpw
2.18360556813275e-83	2.41136	0.568	0.139	3.45642925379732e-79	9	CN	Glipr1
1.08936205463163e-74	2.4096	0.511	0.123	1.72435119627641e-70	9	CN	Irak3
9.49981906526367e-29	2.40874	0.517	0.125	1.50372635984059e-24	15	OG	Ednrb
1.12669465979878e-75	2.4085	0.904	0.339	1.7834449769955e-71	14	rep HEP	Hes6
3.16983257385749e-42	2.40836	0.394	0.134	5.01752798115903e-38	8	CN-M1	Ms4a4c
2.24912528272924e-141	2.40542	0.958	0.52	3.56014041003211e-137	6	CN-M2	Lgals3
3.10248245324601e-77	2.40523	0.436	0.106	4.91091947524311e-73	6	CN-M2	Piezo1
7.64735743445801e-89	2.40455	0.496	0.095	1.21050020830036e-84	9	CN	Gm21188
8.53302408664047e-72	2.40273	0.381	0.085	1.35069238267432e-67	6	CN-M2	St6galnac4
5.10085518142085e-79	2.40156	1	0.951	8.07414366667106e-75	13	EC1	mt-Atp6
1.90609496355411e-148	2.40153	0.864	0.307	3.0171577178098e-144	6	CN-M2	Ms4a6d
2.96719607463522e-62	2.40147	0.372	0.094	4.69677466654009e-58	6	CN-M2	Des
1.58437200644322e-42	2.40062	0.269	0.055	2.50790244899897e-38	9	CN	Arl11
2.06574261049035e-75	2.40001	0.403	0.091	3.26986397814518e-71	6	CN-M2	Fblim1
2.32576812618885e-99	2.3998	0.397	0.066	3.68145836694433e-95	6	CN-M2	Pdpn
1.69441552046349e-133	2.39941	0.647	0.148	2.68209032734166e-129	6	CN-M2	Itgam
7.00969999352579e-84	2.39932	0.962	0.482	1.1095654119752e-79	14	rep HEP	Tlcd2
3.00884683172722e-79	2.39844	0.949	0.464	4.76270364994102e-75	14	rep HEP	Entpd5
5.19197172897579e-59	2.39839	0.261	0.047	8.21837204979578e-55	6	CN-M2	Cd200
2.15260617415082e-71	2.39789	0.833	0.265	3.40736031306333e-67	14	rep HEP	Lss
2.35694336391276e-28	2.39566	0.263	0.052	3.73080565073751e-24	14	rep HEP	Ncaph
3.9853019714029e-93	2.39466	0.723	0.228	6.30833449053365e-89	9	CN	Clec4a1
6.75996521616826e-77	2.39261	1	0.912	1.07003489406727e-72	13	EC1	mt-Co2
7.33670000318226e-71	2.39256	0.436	0.114	1.16132624350372e-66	6	CN-M2	Il33
1.81134290028001e-55	2.3911	0.628	0.173	2.86717467685322e-51	14	rep HEP	Cd163
1.3601607916059e-78	2.38922	0.978	0.508	2.15299851703297e-74	12	HEP2	Cyp2a5
3.76303285326001e-30	2.38757	0.321	0.072	5.95650470342528e-26	14	rep HEP	Kif22
9.56704857890143e-77	2.387	0.853	0.267	1.51436811955431e-72	14	rep HEP	Polr2l
3.47842042978231e-132	2.38567	0.574	0.13	5.50599169830242e-128	3	HEP4	A1bg
1.85315769588739e-105	2.38468	0.862	0.326	2.93336331682015e-101	10	EC2	Gm29966
4.86255919632995e-95	2.38467	1	0.999	7.69694495187068e-91	13	EC1	Hpx
8.62225932548356e-138	2.38428	0.853	0.334	1.36481742863079e-133	6	CN-M2	Nupr1
8.83255513366881e-41	2.38322	0.607	0.127	1.39810515210844e-36	15	OG	Thbs2
1.53384620122895e-49	2.38276	0.25	0.052	2.42792515192531e-45	6	CN-M2	Rgcc
1.40091890956606e-27	2.38256	0.393	0.076	2.21751454195211e-23	15	OG	Ddx3y
9.15649645764455e-150	2.38191	0.703	0.162	1.44938182428056e-145	6	CN-M2	Thbs1
7.89279127577643e-58	2.38159	0.322	0.074	1.24934993104265e-53	6	CN-M2	Pdgfb
4.31686548132167e-31	2.38155	0.282	0.055	6.83316637038407e-27	14	rep HEP	Slc51b
1.82126848096523e-43	2.38137	0.266	0.06	2.88288587851986e-39	8	CN-M1	Batf2
7.74332771469802e-88	2.38106	0.64	0.174	1.22569134395955e-83	9	CN	Rbpj
7.78815146877262e-87	2.38084	1	0.914	1.23278649599202e-82	14	rep HEP	Cps1
8.82580698913874e-25	2.3797	0.404	0.088	1.39703698831077e-20	15	OG	Scara5
8.27356278100501e-18	2.3797	0.258	0.051	1.30962225260528e-13	15	OG	Klrd1
1.4629431947905e-13	2.3797	0.258	0.064	2.31569278303389e-09	15	OG	Bicc1
6.42203860423023e-74	2.37854	0.726	0.18	1.0165444906636e-69	13	EC1	Slc22a26
4.77153221620726e-75	2.37814	0.515	0.124	7.55285834503447e-71	9	CN	Mefv
2.5828618796079e-23	2.37672	0.371	0.079	4.08841206923135e-19	15	OG	Grb10
1.35395139354347e-45	2.37616	0.455	0.099	2.14316966083996e-41	14	rep HEP	Mcm4
2.87261657417891e-107	2.37533	0.773	0.226	4.54706477526779e-103	9	CN	Ncf4
1.91238560888748e-101	2.37448	0.67	0.169	3.027115180308e-97	9	CN	Mcemp1
7.75544482923404e-58	2.37241	0.615	0.153	1.22760936201946e-53	14	rep HEP	Insc
6.96641005185411e-54	2.37219	0.691	0.394	1.10271304710799e-49	8	CN-M1	Nampt
6.09247001104989e-28	2.37169	0.404	0.079	9.64377078049087e-24	15	OG	Ccnb1
3.65685282196151e-128	2.3713	0.773	0.183	5.78843233188288e-124	9	CN	Trem2
1.14713138084082e-71	2.37092	0.394	0.091	1.81579426273293e-67	6	CN-M2	Slamf8
1.69925551993961e-46	2.37019	1	0.892	2.68975156251241e-42	15	OG	mt-Nd2
1.44470121349858e-215	2.37018	0.954	0.332	2.28681755084691e-211	3	HEP4	Cyp2c40
2.26506169760558e-38	2.36926	0.455	0.117	3.58536616113988e-34	14	rep HEP	Gpsm2
8.81277856965742e-51	2.36882	0.5	0.109	1.39497471979107e-46	14	rep HEP	Itgb3bp
1.32568171269713e-30	2.3662	0.438	0.084	2.09842158302829e-26	15	OG	Htra1
4.54243255452307e-96	2.36557	1	0.825	7.19021649055457e-92	13	EC1	Manf
6.39884568994165e-51	2.36489	0.708	0.14	1.01287328426086e-46	15	OG	Lox
4.3268142948694e-80	2.36416	1	0.893	6.84891434734877e-76	13	EC1	mt-Nd4
9.21305294223971e-65	2.36374	0.397	0.103	1.45833415022712e-60	6	CN-M2	Nt5dc2
1.68301106246519e-144	2.36339	1	0.938	2.66403821077615e-140	6	CN-M2	Lyz2
1.16763638570428e-59	2.36208	0.647	0.165	1.84825163493131e-55	14	rep HEP	Slc46a3
5.33697175253927e-24	2.35891	0.256	0.057	8.44789258709441e-20	14	rep HEP	Aurkb
5.85180816589236e-40	2.3582	0.403	0.145	9.26282714579101e-36	8	CN-M1	Ifi211
2.76838324533336e-111	2.35788	0.674	0.243	4.38207383903817e-107	4	HEP3	Mup21
1.05696924849938e-17	2.35726	0.258	0.051	1.67307662344966e-13	15	OG	Gpm6b
4.89556449023454e-93	2.35725	0.542	0.144	7.74918903159225e-89	6	CN-M2	Adam15
3.01640310987309e-84	2.35656	0.397	0.079	4.77466448261811e-80	6	CN-M2	Rab7b
3.79314240161923e-92	2.35647	0.557	0.118	6.00416510752308e-88	9	CN	Basp1
2.64544451369901e-41	2.35546	0.316	0.088	4.18747412073416e-37	8	CN-M1	Tes
1.52570547559171e-59	2.35501	0.635	0.158	2.41503919731412e-55	14	rep HEP	Atg16l2
2.06191273242358e-46	2.35485	1	0.828	3.26380166415328e-42	15	OG	H2-Ab1
3.69998470684296e-91	2.35463	0.994	0.82	5.85670579246172e-87	13	EC1	Steap4
7.26854733031906e-30	2.35432	0.301	0.065	1.1505383569162e-25	14	rep HEP	Tpx2
5.88274185588866e-46	2.35167	0.921	0.342	9.31179208368617e-42	15	OG	Gm29966
1.72065954473835e-33	2.35096	0.329	0.072	2.72363199336634e-29	13	EC1	Tnfrsf11b
1.24421260344843e-74	2.34985	0.561	0.152	1.96946412999852e-70	9	CN	Cd24a
2.84000831973861e-89	2.34983	0.508	0.128	4.49544916931424e-85	6	CN-M2	Fam129b
2.13381763980588e-167	2.34873	0.983	0.548	3.37761994204873e-163	6	CN-M2	Vim
1.86917461032518e-27	2.34759	0.607	0.185	2.95871649068372e-23	15	OG	Rarres1
5.14030334532034e-42	2.3473	0.516	0.232	8.13658616530756e-38	8	CN-M1	Btg2
8.68058650924565e-40	2.34704	0.73	0.194	1.37405003854849e-35	15	OG	Fgl2
4.0813219023473e-32	2.34622	0.353	0.132	6.46032443922554e-28	8	CN-M1	Sp140
2.96404932476018e-136	2.3455	0.836	0.311	4.6917936761629e-132	6	CN-M2	Slc25a4
3.25609909618296e-64	2.34318	0.431	0.123	5.15407925934801e-60	6	CN-M2	Trbc2
4.02933678138881e-59	2.34153	0.308	0.066	6.37803719126035e-55	6	CN-M2	Sfxn3
2.11233761827638e-87	2.34097	1	0.896	3.34361921596968e-83	14	rep HEP	Saa2
1.01745313839636e-48	2.34081	0.253	0.053	1.61052657276759e-44	6	CN-M2	Clmp
5.07513738421935e-42	2.33981	0.876	0.293	8.03343496548082e-38	15	OG	H2-DMb1
6.65068414872181e-48	2.3393	0.362	0.104	1.05273679390118e-43	8	CN-M1	A2m
3.75195583260927e-48	2.33853	0.384	0.11	5.93897088743722e-44	8	CN-M1	Tnf
4.41376454496455e-41	2.33761	0.404	0.086	6.98654789822439e-37	14	rep HEP	Ccna2
1.90458134840498e-40	2.33541	0.35	0.11	3.01476181639024e-36	8	CN-M1	Fos
5.75593536023846e-55	2.3352	1	0.963	9.11107008172146e-51	15	OG	Rpl37a
4.20533678211809e-36	2.33498	0.265	0.062	6.65662759241472e-32	9	CN	Ankrd37
2.06692563955601e-55	2.33488	0.628	0.165	3.2717365948532e-51	14	rep HEP	Rmdn2
1.95855510755168e-33	2.33426	0.34	0.073	3.10019687974355e-29	14	rep HEP	Uhrf1
1.66259174237515e-52	2.33375	0.609	0.158	2.63171646900563e-48	14	rep HEP	Rdh16
1.94023502677223e-15	2.3336	0.258	0.057	3.07119802387776e-11	15	OG	Large1
8.05892541745965e-35	2.33266	0.313	0.067	1.27564730432969e-30	12	HEP2	Tuba8
4.63994567536552e-62	2.33186	0.364	0.088	7.34457000953609e-58	6	CN-M2	Arl4c
3.13279038867245e-24	2.33159	0.25	0.084	4.95889390622962e-20	8	CN-M1	Stx11
3.08875001781809e-49	2.33153	0.622	0.187	4.88918240320425e-45	14	rep HEP	Slc23a1
8.91213150710958e-31	2.33008	0.314	0.068	1.41070129626038e-26	14	rep HEP	Tuba8
1.27009209139022e-93	2.32963	0.55	0.146	2.01042877146158e-89	6	CN-M2	P2ry6
3.89060901938798e-44	2.32958	0.265	0.052	6.15844501678923e-40	9	CN	Tnfrsf9
5.91082365846115e-51	2.32912	0.256	0.052	9.35624276897815e-47	6	CN-M2	Arl11
2.24239164742903e-63	2.32882	0.265	0.053	3.54948173871541e-59	3	HEP4	Slc22a27
1.46193119079212e-59	2.32838	0.525	0.188	2.31409088190485e-55	8	CN-M1	Pde4b
9.46341851121444e-98	2.32805	0.682	0.177	1.49796451614013e-93	9	CN	Emb
3.71231692421769e-68	2.32584	0.473	0.112	5.87622645934418e-64	9	CN	Tnfaip8
3.33473104987373e-92	2.32528	1	0.931	5.27854577884513e-88	14	rep HEP	Bhmt
1.18014533702047e-82	2.32277	0.945	0.473	1.86805205396971e-78	13	EC1	St6gal1
3.86006512425477e-67	2.32236	0.981	0.619	6.11009708518288e-63	14	rep HEP	Gstm2
4.50788669785109e-33	2.3223	0.328	0.111	7.13553385402849e-29	8	CN-M1	Samsn1
5.17174674176968e-24	2.32152	0.725	0.685	8.18635791754722e-20	8	CN-M1	Ifitm1
1.24446072675903e-15	2.32104	0.292	0.07	1.96985688438688e-11	15	OG	Fbln1
2.73564479279037e-37	2.32041	0.269	0.069	4.33025214250787e-33	8	CN-M1	Igfbp6
2.19572167401382e-44	2.31988	0.367	0.098	3.47560783779647e-40	9	CN	Ebi3
5.28796455235768e-38	2.31981	0.488	0.213	8.37031908992698e-34	8	CN-M1	Chil1
6.24892510062187e-106	2.3195	0.622	0.172	9.89142354177436e-102	6	CN-M2	Emb
1.914253590295e-71	2.31865	0.403	0.096	3.03007200807795e-67	6	CN-M2	Pdlim2
3.52180499266743e-155	2.31722	0.972	0.614	5.57466512289327e-151	6	CN-M2	Tgfbi
3.44068982582225e-71	2.31695	0.35	0.071	5.44626792529404e-67	6	CN-M2	Abcc1
1.2165144117759e-75	2.3165	0.481	0.133	1.92562066240007e-71	6	CN-M2	Lama4
5.9724241576591e-46	2.31623	0.944	0.41	9.45375019915859e-42	15	OG	1810008I18Rik
2.92698808260097e-64	2.3151	0.692	0.177	4.63312943594907e-60	14	rep HEP	Rarres1
8.49074811526368e-33	2.31261	0.338	0.118	1.34400051916509e-28	8	CN-M1	Cyp4f18
9.3298042625897e-75	2.31219	0.583	0.164	1.47681471672532e-70	9	CN	Fyb
1.60140902122709e-77	2.31164	0.525	0.157	2.53487033970036e-73	6	CN-M2	Cerk
2.12553121216531e-62	2.31126	0.776	0.251	3.36450335573647e-58	14	rep HEP	Dnajc22
5.39594449859265e-47	2.31098	0.506	0.12	8.5412405468223e-43	14	rep HEP	Them7
2.36371050425066e-47	2.31017	0.331	0.092	3.74151735717836e-43	6	CN-M2	Ccn1
1.48926057333457e-87	2.30947	0.987	0.529	2.35735056153129e-83	14	rep HEP	2200002D01Rik
7.33544229875471e-53	2.30832	1	0.9	1.16112716146988e-48	15	OG	Rps27
1.14526702182991e-54	2.30789	1	0.964	1.81284316885457e-50	15	OG	Rpl39
2.04067506694115e-112	2.30749	0.539	0.113	3.23018456346114e-108	6	CN-M2	Sema4d
1.05262061074681e-24	2.3058	0.472	0.117	1.66619316475112e-20	15	OG	Trim35
1.54314874139423e-16	2.3057	0.303	0.072	2.44265014275292e-12	15	OG	Matn2
1.21374691432835e-88	2.30563	1	0.902	1.92123999069034e-84	14	rep HEP	Aldh1a1
1.22115057257681e-45	2.30538	1	0.745	1.93295924133183e-41	15	OG	H2-Eb1
1.07414154113875e-34	2.30482	0.25	0.058	1.70025864546853e-30	9	CN	Ampd3
5.36394312471576e-130	2.3035	1	0.974	8.49058557211257e-126	10	EC2	mt-Co3
5.94365764440512e-55	2.30341	0.583	0.139	9.40821568532887e-51	14	rep HEP	Mcm5
1.16380757434654e-22	2.30173	0.269	0.066	1.84219100943314e-18	14	rep HEP	Slc25a48
6.32362495174774e-48	2.30149	0.831	0.221	1.00096659361215e-43	15	OG	Fstl1
1.67910397530794e-31	2.30055	0.327	0.072	2.65785368251494e-27	14	rep HEP	Gins1
5.07605994835295e-59	2.30043	0.339	0.08	8.03489529224789e-55	6	CN-M2	Sash3
3.37181298097407e-46	2.30033	0.28	0.055	5.33724276758385e-42	9	CN	Myo5a
7.43532410985693e-90	2.2991	1	0.865	1.17693745334925e-85	14	rep HEP	Fdps
1.43557446963497e-32	2.29887	0.333	0.072	2.2723708279852e-28	14	rep HEP	Mettl22
1.20825037982795e-48	2.29765	0.59	0.165	1.91253952622966e-44	14	rep HEP	Gmnn
4.85214769082081e-47	2.29627	1	0.567	7.68046457980026e-43	15	OG	mt-Nd3
3.65840636282804e-20	2.2961	0.303	0.06	5.79089143172051e-16	15	OG	Srpx2
1.32964612393993e-88	2.29374	1	0.571	2.10469684958452e-84	14	rep HEP	Ces2e
6.03674471456187e-58	2.29335	0.466	0.125	9.55556320867998e-54	9	CN	Gm46224
6.49903036598126e-130	2.29225	0.85	0.337	1.02873151663117e-125	6	CN-M2	Emp3
1.71468040004143e-71	2.29214	0.801	0.223	2.71416760522559e-67	14	rep HEP	Elovl6
6.09433642853147e-97	2.29135	1	0.716	9.64672513272246e-93	13	EC1	Serpina10
4.21121854897381e-38	2.29023	1	0.87	6.66593784117065e-34	15	OG	Serpina1e
5.00434345653564e-34	2.28956	0.253	0.067	7.92137525735027e-30	8	CN-M1	Nfkbid
9.5141560095618e-30	2.28667	0.353	0.088	1.50599575475354e-25	14	rep HEP	Gabbr2
1.2738698313365e-49	2.28565	0.283	0.066	2.01640855602255e-45	6	CN-M2	Mical1
2.43438614594154e-64	2.28454	0.795	0.253	3.85338983041086e-60	14	rep HEP	Thnsl2
4.12356076112533e-72	2.28403	0.511	0.154	6.52718432878528e-68	6	CN-M2	Snhg18
2.39230823573528e-100	2.28301	0.792	0.264	3.78678470634538e-96	9	CN	Ms4a7
1.1745752219231e-51	2.28283	0.286	0.064	1.85923511878208e-47	6	CN-M2	B4galt6
1.48779330023919e-38	2.28262	0.519	0.153	2.35502801494861e-34	14	rep HEP	Cyp7a1
2.51894796071273e-58	2.28211	0.756	0.256	3.98724272701218e-54	14	rep HEP	Timm9
5.55968213989442e-113	2.28157	1	0.579	8.80042085923888e-109	10	EC2	Gm42418
2.60533414360545e-97	2.28136	0.639	0.203	4.12398341591307e-93	6	CN-M2	Hspg2
1.35659279492758e-62	2.28034	0.308	0.062	2.14735073509086e-58	6	CN-M2	Cxcr4
3.52656701057629e-28	2.27971	0.483	0.11	5.58220292104121e-24	15	OG	Gimap5
4.71549573445951e-79	2.27896	1	0.56	7.46415819807597e-75	13	EC1	mt-Nd3
2.66380157582427e-45	2.27856	0.526	0.133	4.21653151437224e-41	14	rep HEP	Gsta2
1.71979530061862e-46	2.278	0.513	0.124	2.72226398134921e-42	14	rep HEP	Haus4
3.02245612502253e-63	2.27706	0.769	0.248	4.78424580029816e-59	14	rep HEP	Acaca
1.23295558410957e-56	2.27624	0.431	0.134	1.95164539408704e-52	6	CN-M2	Mest
5.09865362502065e-92	2.27597	0.603	0.183	8.07065882304519e-88	6	CN-M2	Pxdn
5.14789410822767e-45	2.27466	0.526	0.135	8.14860158391357e-41	14	rep HEP	Hnmt
2.77605741405976e-120	2.27465	0.886	0.45	4.3942212807152e-116	6	CN-M2	Clec4n
6.63999754803388e-34	2.27462	0.333	0.07	1.05104521187828e-29	14	rep HEP	Haus1
1.66712987352649e-27	2.27295	0.268	0.057	2.63889987680509e-23	13	EC1	Dnaic1
4.6261196139616e-38	2.27273	0.406	0.149	7.32268473693981e-34	8	CN-M1	Ptafr
1.11507889631976e-49	2.27229	0.921	0.291	1.76505838498454e-45	15	OG	H2-DMa
3.6895741998655e-70	2.27167	0.436	0.114	5.8402270009671e-66	6	CN-M2	Pmepa1
1.63841019200774e-67	2.27112	0.489	0.121	2.59343949292906e-63	9	CN	Batf
1.48846054776929e-133	2.27063	0.996	0.527	2.35608420106401e-129	9	CN	Lgals3
7.77326994916738e-26	2.26977	0.303	0.048	1.2304309002537e-21	15	OG	Syngr1
3.0961789327905e-91	2.26965	1	0.722	4.90094163271409e-87	14	rep HEP	Krt8
5.78156811529164e-47	2.26939	0.753	0.178	9.15164416969514e-43	15	OG	Mxra8
3.64364937244037e-54	2.26916	0.628	0.167	5.76753259163586e-50	14	rep HEP	Hdhd3
2.35693573955729e-85	2.26863	1	0.988	3.73079358214524e-81	14	rep HEP	Orm1
1.46767418183598e-80	2.26816	0.517	0.139	2.32318146242817e-76	6	CN-M2	Ccl8
3.71340458474265e-45	2.26735	0.264	0.062	5.87794811718914e-41	6	CN-M2	Slc8a1
2.74321128556488e-64	2.26698	0.793	0.288	4.34222914392064e-60	13	EC1	Syvn1
7.49441458110682e-59	2.26609	0.699	0.202	1.1862908840434e-54	14	rep HEP	Emc9
3.56607703647046e-28	2.26592	0.274	0.062	5.64474334102908e-24	12	HEP2	Cyp2c55
4.00251030727558e-45	2.26528	0.356	0.09	6.33557356538652e-41	9	CN	Pik3r5
4.2866101017402e-91	2.265	0.735	0.229	6.78527513004456e-87	9	CN	Tnfrsf1b
1.00227106734042e-43	2.26044	0.809	0.232	1.58649487249316e-39	15	OG	Pycard
1.47178744242637e-67	2.26017	0.594	0.234	2.3296923426167e-63	6	CN-M2	S100a4
5.06662132545224e-36	2.25939	0.397	0.093	8.01995489605836e-32	14	rep HEP	Cdt1
5.94230718585427e-30	2.25812	0.291	0.066	9.40607804448873e-26	12	HEP2	Rhbg
7.38545676900197e-87	2.25776	0.987	0.615	1.16904395196532e-82	14	rep HEP	Pmvk
1.86265411106401e-43	2.25657	0.978	0.627	2.94839519240322e-39	15	OG	Rbp1
6.2771068978302e-49	2.2558	1	0.838	9.93603250857542e-45	15	OG	C1qa
3.90765313697291e-52	2.25545	0.665	0.208	6.18542415051443e-48	13	EC1	Cd55
2.0434231818716e-36	2.25422	0.349	0.098	3.23453455458455e-32	11	NC-P	Ptges
7.5187104995873e-34	2.25417	0.438	0.076	1.19013668497967e-29	15	OG	Mfap2
4.2848249885639e-142	2.25364	0.958	0.562	6.78244947439779e-138	6	CN-M2	Lgals1
1.22466124521524e-38	2.25183	0.412	0.152	1.9385162850512e-34	8	CN-M1	Sell
3.34609869407334e-70	2.25138	0.538	0.143	5.29653962284868e-66	9	CN	N4bp1
2.40900578968929e-139	2.251	0.87	0.378	3.81321526449918e-135	3	HEP4	Cyp2c37
1.6347796055957e-75	2.25075	0.799	0.23	2.58769263769744e-71	12	HEP2	Slc13a3
2.45669678312632e-17	2.25053	0.303	0.069	3.88870533801066e-13	15	OG	Poglut3
9.06962346189392e-51	2.2498	0.379	0.092	1.43563069778319e-46	9	CN	Slc27a1
5.54888207452305e-51	2.24846	0.375	0.09	8.78332543576254e-47	9	CN	Milr1
1.11141879262801e-99	2.24836	1	0.942	1.75926480685087e-95	13	EC1	Cfh
5.27885319967858e-67	2.2467	0.572	0.204	8.35589672977122e-63	8	CN-M1	Gbp3
1.12421474360688e-166	2.2459	1	0.818	1.77951951765533e-162	6	CN-M2	Tmsb10
7.00391972686231e-43	2.24526	0.25	0.048	1.10865045356503e-38	9	CN	Nlrp3
2.23601590248446e-39	2.2452	0.5	0.137	3.53938957204266e-35	14	rep HEP	Pir
1.03527018371928e-67	2.24513	0.404	0.119	1.63872917380925e-63	3	HEP4	Cyp2c38
2.47872486432831e-82	2.24423	1	0.86	3.92357358774528e-78	13	EC1	Saa3
1.28990022361673e-41	2.24314	0.526	0.143	2.04178306396292e-37	14	rep HEP	Gm15638
5.21609261331031e-47	2.24203	1	0.984	8.25655299760889e-43	15	OG	mt-Co1
4.29040994268595e-47	2.24123	0.311	0.082	6.79128989827759e-43	6	CN-M2	Esm1
3.40276110882406e-26	2.24088	0.336	0.117	5.38623055915761e-22	11	NC-P	Tnf
5.31834455545227e-34	2.24032	0.652	0.174	8.4184075968254e-30	15	OG	Cldn5
6.70106067803367e-71	2.2399	0.477	0.108	1.06071089472595e-66	9	CN	Tnf
5.15190782873846e-25	2.23985	0.276	0.063	8.15495490211011e-21	14	rep HEP	Slfn9
1.11394328646205e-82	2.23961	0.968	0.457	1.76326082814078e-78	14	rep HEP	Timm8a1
1.13082563406611e-35	2.23908	0.404	0.096	1.78998389616325e-31	14	rep HEP	Fam187b
1.81756139885699e-114	2.23891	0.72	0.168	2.87701793825074e-110	9	CN	Mmp12
1.13298469500118e-20	2.2389	0.393	0.096	1.79340147371738e-16	15	OG	Atp8a1
1.18501772972638e-61	2.23881	0.578	0.218	1.87576456438389e-57	8	CN-M1	Pfkfb3
1.7584356367479e-125	2.23817	1	0.588	2.78342776940825e-121	9	CN	S100a6
3.40367618197088e-117	2.23775	0.736	0.228	5.38767902844171e-113	6	CN-M2	Tubb6
3.4638169688784e-42	2.23621	0.597	0.336	5.48287588003762e-38	8	CN-M1	Plscr1
1.14552504569786e-13	2.23607	0.281	0.072	1.81325159483514e-09	15	OG	Tfdp2
1.87554574592631e-140	2.23539	0.872	0.331	2.96880136122676e-136	6	CN-M2	Hif1a
7.16423596962819e-43	2.235	1	0.913	1.13402691163245e-38	15	OG	mt-Co2
1.18004670731993e-49	2.23453	0.564	0.142	1.86789593301672e-45	14	rep HEP	Pex3
1.17913423461416e-59	2.23306	0.358	0.089	1.86645157997075e-55	6	CN-M2	P4ha2
5.38001337228978e-26	2.23292	0.681	0.57	8.5160231669975e-22	8	CN-M1	Zfp36
9.57811586804501e-44	2.23258	1	0.591	1.51611996075284e-39	15	OG	Col1a2
4.76597373667209e-64	2.23248	0.525	0.184	7.54405982777826e-60	6	CN-M2	Mcam
3.15022707541974e-46	2.23242	1	0.791	4.9864944376819e-42	15	OG	H2-Aa
6.11642215650625e-149	2.23213	1	0.803	9.68168463153375e-145	6	CN-M2	Ctss
9.72291977100073e-53	2.2318	0.328	0.082	1.53904097055171e-48	6	CN-M2	Ikbip
5.65962024390752e-74	2.22865	0.936	0.373	8.95861288408121e-70	14	rep HEP	Selenoh
7.27143324872922e-76	2.22765	0.568	0.144	1.15099516894135e-71	9	CN	Asprv1
4.44415878700948e-31	2.22763	0.378	0.095	7.03465894395731e-27	14	rep HEP	Snrpn
2.77628432452421e-90	2.22733	1	0.779	4.39458045728938e-86	14	rep HEP	Khk
2.32008901663864e-63	2.22674	0.462	0.112	3.67246890443731e-59	9	CN	Bcl2a1a
3.55349628061191e-38	2.22631	0.468	0.122	5.6248292625806e-34	14	rep HEP	Cyp26a1
9.18985203097495e-89	2.22589	1	0.789	1.45466167798302e-84	14	rep HEP	Osgin1
1.14914300895873e-52	2.2245	0.933	0.295	1.81897846888077e-48	15	OG	Col5a2
8.14535934582681e-47	2.22424	0.381	0.113	1.28932893085093e-42	8	CN-M1	Bcl2a1a
1.81624851105367e-40	2.2242	0.474	0.119	2.87493976814685e-36	14	rep HEP	Hmgb3
1.10058352680369e-35	2.22226	0.442	0.116	1.74211366457757e-31	14	rep HEP	Gemin2
6.90422977717004e-75	2.22225	0.929	0.411	1.09287053142825e-70	14	rep HEP	Isyna1
6.86939547355682e-90	2.22171	0.539	0.142	1.08735660950931e-85	6	CN-M2	Selenon
5.95195174938071e-76	2.22005	0.617	0.179	9.42134442409473e-72	9	CN	Rilpl2
1.16821014994719e-63	2.22005	0.439	0.1	1.8491598463514e-59	9	CN	Traf1
1.27210936569538e-57	2.22005	0.367	0.076	2.01362191495922e-53	9	CN	Clec5a
4.39914716653774e-60	2.21963	0.361	0.089	6.96341004991259e-56	6	CN-M2	Chst12
4.03521578259838e-88	2.21828	0.483	0.135	6.38734306227498e-84	3	HEP4	Acot1
5.08509485556819e-57	2.21773	0.664	0.249	8.04919664687888e-53	11	NC-P	Ccl4
9.03731933139622e-25	2.21713	0.256	0.055	1.43051727696671e-20	14	rep HEP	Qrsl1
6.85227992895962e-34	2.21682	0.391	0.094	1.08464738995502e-29	14	rep HEP	Nqo1
8.21236625830363e-38	2.21631	0.474	0.125	1.29993545502688e-33	14	rep HEP	Rpa2
1.22342429313498e-42	2.21561	1	0.952	1.93655831360336e-38	15	OG	mt-Atp6
6.17418470363187e-37	2.2149	1	0.972	9.77311696737889e-33	15	OG	Scd1
2.26793042411785e-74	2.21466	0.962	0.443	3.58990706833615e-70	14	rep HEP	Cxadr
1.64373849526627e-61	2.21405	0.436	0.13	2.60187366415698e-57	6	CN-M2	Lhfpl2
6.29850540260986e-39	2.21353	0.607	0.128	9.96990420179116e-35	15	OG	Serpine2
1.00540882195841e-86	2.21335	0.987	0.574	1.59146162427796e-82	14	rep HEP	Tmem86b
4.71192493016784e-40	2.21335	0.41	0.09	7.45850597196268e-36	14	rep HEP	Ckap2l
1.93940998263288e-41	2.21241	0.538	0.152	3.06989206150958e-37	14	rep HEP	Gas2
1.42918271152596e-111	2.21221	0.614	0.152	2.26225331407445e-107	6	CN-M2	C5ar1
1.44998739192919e-44	2.21148	0.551	0.148	2.29518504268472e-40	14	rep HEP	Tdp2
2.93743977914132e-68	2.21128	0.466	0.107	4.6496734264028e-64	9	CN	Samsn1
2.3023082673999e-52	2.21126	1	0.959	3.6443237564673e-48	15	OG	Rps29
1.16822421739808e-78	2.21046	1	0.975	1.84918211371943e-74	13	EC1	mt-Co3
4.99962299233479e-93	2.20987	1	0.889	7.91390323456673e-89	14	rep HEP	Psen2
7.70154817051279e-73	2.20974	0.403	0.092	1.21907805991047e-68	6	CN-M2	Ptprs
5.55421104442339e-63	2.20972	0.428	0.096	8.79176066221779e-59	9	CN	Cd3g
2.05823247328851e-65	2.20877	0.859	0.314	3.25797618196838e-61	14	rep HEP	Gstm4
8.73777554350837e-53	2.20865	0.673	0.201	1.38310249078194e-48	14	rep HEP	Mcm7
6.49946675395527e-127	2.20833	1	0.983	1.02880059248358e-122	10	EC2	mt-Co1
6.47486439763532e-113	2.20718	0.981	0.533	1.02490628550169e-108	9	CN	Slpi
1.389643332696e-46	2.2067	0.888	0.281	2.1996664313245e-42	15	OG	Ms4a7
4.96895035640979e-110	2.20634	0.705	0.177	7.86535151916105e-106	9	CN	Hilpda
9.11956978331518e-17	2.20631	0.337	0.086	1.44353670100096e-12	15	OG	Fbln5
4.95402657351055e-91	2.20622	1	0.789	7.84172866320985e-87	14	rep HEP	Krt18
7.73027064221387e-59	2.20574	0.358	0.089	1.22362453995603e-54	6	CN-M2	Dbn1
5.24049552980526e-68	2.20528	0.891	0.35	8.29518037412875e-64	14	rep HEP	Slc25a25
3.64687115057435e-38	2.20487	0.753	0.216	5.77263234424414e-34	15	OG	Selenom
1.63615664698911e-45	2.20437	0.319	0.089	2.58987235651906e-41	6	CN-M2	Praf2
9.07792739126754e-156	2.2037	0.978	0.593	1.43694512676374e-151	6	CN-M2	Tagln2
1.19386756890145e-63	2.20301	0.827	0.28	1.8897729748141e-59	14	rep HEP	Ppcs
1.10277191566821e-55	2.20035	0.738	0.252	1.74557766531121e-51	13	EC1	Hsph1
8.93040501735299e-75	2.20016	0.422	0.101	1.4135938101968e-70	6	CN-M2	Endod1
6.36594215510721e-37	2.19998	0.378	0.082	1.00766498373192e-32	14	rep HEP	Fen1
1.18429199980521e-34	2.19714	0.551	0.116	1.87461580649167e-30	15	OG	Nt5dc2
3.53651342229621e-86	2.19702	1	0.912	5.59794709615268e-82	14	rep HEP	Orm2
6.03111051357801e-41	2.1962	0.345	0.091	9.54664483194264e-37	9	CN	Dtx2
7.94790552687339e-33	2.19605	0.539	0.118	1.25807396584879e-28	15	OG	Smoc2
3.46252796780711e-86	2.19404	1	0.947	5.48083552024188e-82	14	rep HEP	Gstm1
6.46281427213926e-31	2.19345	0.334	0.121	1.02299887113692e-26	8	CN-M1	Jam2
9.6399227706489e-66	2.19228	0.433	0.12	1.52590337536601e-61	6	CN-M2	Wls
6.01159285832351e-38	2.1905	0.429	0.103	9.51575033544029e-34	14	rep HEP	Acmsd
2.89140502350481e-43	2.1896	0.966	0.599	4.57680501170577e-39	15	OG	Lst1
2.58237199494418e-41	2.18936	0.269	0.069	4.08763663079714e-37	6	CN-M2	Gimap3
1.85771478115675e-82	2.18926	0.803	0.279	2.94057672709303e-78	11	NC-P	Cxcl2
3.18314493289242e-96	2.18855	0.879	0.402	5.03860011427541e-92	9	CN	Card19
5.20872222338869e-28	2.18841	0.607	0.179	8.24488640740195e-24	15	OG	Lpcat2
9.00296773954031e-56	2.18749	0.462	0.125	1.42507976349184e-51	9	CN	Sema4d
3.06076375486132e-43	2.18721	0.65	0.414	4.84488294756999e-39	8	CN-M1	Junb
1.03960878376587e-62	2.18697	0.788	0.254	1.645596743823e-58	14	rep HEP	Dhfr
1.84301624798526e-61	2.18641	0.756	0.248	2.91731041893586e-57	13	EC1	Serpina7
1.04885120285224e-22	2.18565	0.295	0.078	1.66022656899481e-18	14	rep HEP	Xkr9
1.21099538959064e-56	2.18458	0.347	0.086	1.91688460218302e-52	6	CN-M2	Uck2
7.9240743574541e-13	2.1845	0.258	0.066	1.25430173004141e-08	15	OG	Rnase6
7.08449229259942e-29	2.18365	0.365	0.095	1.12140428499556e-24	14	rep HEP	9630013D21Rik
1.01179207943951e-74	2.18354	0.663	0.22	1.6015656825448e-70	9	CN	Pycard
4.76266285840564e-120	2.18342	0.833	0.238	7.53881903857028e-116	9	CN	Ccl4
2.28469293039094e-49	2.18305	0.333	0.09	3.61644043951582e-45	6	CN-M2	Slc27a1
8.01078461082164e-40	2.18275	0.481	0.122	1.26802709604696e-35	14	rep HEP	C4a
1.93298903197135e-26	2.18215	0.328	0.111	3.05972833870745e-22	11	NC-P	Il1f9
1.64738563323333e-68	2.18203	0.917	0.353	2.60764671884504e-64	14	rep HEP	Folr2
6.2921297033339e-78	2.18156	0.955	0.441	9.95981210740724e-74	14	rep HEP	Gsta4
9.7026001916987e-86	2.18156	0.987	0.61	1.53582458434399e-81	14	rep HEP	Sigmar1
1.61571731609365e-20	2.18148	0.25	0.062	2.55751893964463e-16	14	rep HEP	Hsd3b5
7.80309519738096e-69	2.18115	0.534	0.143	1.23515193879343e-64	9	CN	Aoah
2.11044657501319e-34	2.18054	0.436	0.116	3.34062588358839e-30	14	rep HEP	Zfand4
1.22050195515405e-62	2.17973	0.515	0.142	1.93193254481335e-58	9	CN	Ltb
3.30543487285412e-76	2.17847	0.987	0.651	5.23217286024078e-72	14	rep HEP	Ces1g
2.49043462234533e-106	2.17797	0.898	0.37	3.94210896371042e-102	9	CN	Cotl1
9.1795350962513e-31	2.17741	0.259	0.075	1.45302861038562e-26	8	CN-M1	Oas3
1.19907573214031e-83	2.17612	0.75	0.267	1.8980169764049e-79	9	CN	Slc11a1
1.2624214533897e-29	2.17598	0.272	0.084	1.99828691857056e-25	8	CN-M1	Cmpk2
7.36283280220346e-22	2.17437	0.288	0.076	1.16546280426079e-17	14	rep HEP	Ccdc51
9.16031528838154e-56	2.17274	0.511	0.235	1.44998630699791e-51	0	M	Mmp2
1.82650121558171e-14	2.17128	0.281	0.069	2.89116877414429e-10	15	OG	Tshz2
1.18654576586438e-64	2.16942	0.447	0.101	1.87818329278672e-60	9	CN	Arl5c
9.59967497266114e-28	2.16928	0.652	0.21	1.51953255142253e-23	15	OG	Ggh
3.84646684515937e-63	2.1688	0.795	0.257	6.08857236920277e-59	14	rep HEP	Mup14
4.35227978362609e-35	2.16863	0.404	0.097	6.88922366950174e-31	14	rep HEP	Sdr39u1
4.51982236958764e-19	2.16843	0.256	0.069	7.15442682882027e-15	14	rep HEP	Msh6
1.35338805252196e-78	2.16804	0.509	0.166	2.142277948337e-74	3	HEP4	Etnppl
4.59512311842329e-106	2.16785	0.667	0.199	7.27362038415223e-102	6	CN-M2	Bcl2a1b
2.7336523715519e-60	2.16781	0.763	0.235	4.3270983389295e-56	14	rep HEP	Pmf1
3.1057816980648e-14	2.16779	0.551	0.259	4.91614184986677e-10	15	OG	Serpina7
9.01308934146299e-38	2.16602	0.519	0.15	1.42668191186018e-33	14	rep HEP	Clp1
1.64201371556676e-29	2.16602	0.346	0.084	2.59914351037062e-25	14	rep HEP	Ndc1
1.73762021425896e-123	2.16578	0.939	0.602	2.75047903715051e-119	6	CN-M2	Crip1
4.08384225792867e-35	2.16512	0.455	0.124	6.4643139100753e-31	14	rep HEP	Tipin
1.77761788031158e-69	2.16488	0.878	0.321	2.8137913427452e-65	14	rep HEP	Nsdhl
1.20827337284467e-24	2.16428	0.256	0.055	1.91257592187583e-20	14	rep HEP	Rab23
8.28848020933301e-67	2.16371	0.846	0.284	1.31198353233532e-62	14	rep HEP	Gbe1
1.03587742486939e-122	2.16313	0.914	0.513	1.63969037582576e-118	6	CN-M2	Cd68
3.36330429423271e-18	2.1625	0.371	0.094	5.32377436734095e-14	15	OG	Napsa
4.76397806700556e-39	2.16091	0.703	0.511	7.54090088226311e-35	8	CN-M1	Irf1
3.55399390189363e-92	2.16048	1	0.742	5.62561694730742e-88	14	rep HEP	Fmo5
1.88896747961287e-52	2.15966	0.699	0.223	2.99004662347921e-48	14	rep HEP	Usp50
2.76695105790817e-40	2.15962	0.545	0.16	4.37980682956284e-36	14	rep HEP	Lyrm9
2.12892305342359e-73	2.1592	0.519	0.157	3.36987230126421e-69	6	CN-M2	Evi2a
2.91410620083901e-40	2.1592	0.278	0.075	4.61273870530808e-36	6	CN-M2	Mxra7
1.18030787321183e-100	2.15816	0.897	0.493	1.86830933250701e-96	6	CN-M2	Ccl5
1.273698070093e-35	2.15816	0.455	0.122	2.01613667515022e-31	14	rep HEP	Fam47e
1.24285071232918e-110	2.15754	0.706	0.219	1.96730839254587e-106	6	CN-M2	Clec4a1
5.54821924163135e-89	2.1572	1	0.767	8.78227623757826e-85	14	rep HEP	Tuba1c
2.97168264777873e-60	2.15691	0.386	0.1	4.70387646316896e-56	6	CN-M2	Bex3
2.54936029398958e-70	2.15626	0.917	0.352	4.03538240935611e-66	14	rep HEP	Gm27216
2.3143709649075e-61	2.15577	0.473	0.121	3.66341780035208e-57	9	CN	Snx20
1.63762509473258e-38	2.15564	0.261	0.069	2.5921967624522e-34	6	CN-M2	Pdlim4
1.15961180847489e-41	2.1543	0.506	0.132	1.83554953163491e-37	14	rep HEP	Vmo1
3.7279889059759e-92	2.15422	1	0.825	5.90103363926926e-88	14	rep HEP	Ugt2b5
2.69500635490572e-41	2.15381	0.686	0.258	4.26592555918027e-37	14	rep HEP	Cib3
5.30269635502397e-50	2.15355	0.784	0.536	8.39363806036744e-46	8	CN-M1	Hba-a1
5.07282933075726e-33	2.15188	0.442	0.123	8.02978154765566e-29	14	rep HEP	Nubpl
3.25213358074221e-71	2.15123	0.481	0.137	5.14780224495685e-67	6	CN-M2	Apobec3
3.47107962057248e-23	2.15006	0.404	0.091	5.49437193140418e-19	15	OG	Ehd2
8.06022705713003e-27	2.14983	0.472	0.109	1.27585334087311e-22	15	OG	Dkk3
4.08549528042376e-52	2.14873	0.344	0.092	6.46693047938276e-48	6	CN-M2	Sh3bp1
3.17325356125852e-16	2.14824	0.315	0.077	5.0229430621161e-12	15	OG	Chst14
3.13010741092451e-23	2.14752	0.276	0.067	4.9546470207524e-19	14	rep HEP	Chd1l
1.7155417658675e-21	2.14726	0.427	0.107	2.71553106119167e-17	15	OG	Pafah1b3
2.54396969600875e-95	2.14657	1	0.916	4.02684963181225e-91	14	rep HEP	Aldh1l1
2.32559891370029e-24	2.14624	0.461	0.111	3.68119052049619e-20	15	OG	Pdlim2
1.88619598158242e-90	2.14595	0.639	0.206	2.98565961924682e-86	6	CN-M2	Il2rg
2.25745481733506e-75	2.1459	0.994	0.659	3.57332523035966e-71	14	rep HEP	Fcna
9.11133924980512e-42	2.14587	0.652	0.138	1.44223388985165e-37	15	OG	C1qtnf6
9.72122816137674e-27	2.14577	0.308	0.073	1.53877320566432e-22	14	rep HEP	Tacc3
8.64732234320907e-125	2.14569	1	0.815	1.36878465370656e-120	9	CN	S100a8
1.32386089232778e-84	2.14547	0.478	0.114	2.09553940646565e-80	6	CN-M2	Pstpip1
1.09327792077356e-58	2.14506	0.806	0.515	1.73054962079247e-54	8	CN-M1	Hba-a2
5.20351199645825e-53	2.1444	0.544	0.219	8.23663913919376e-49	8	CN-M1	Gbp7
4.95753165242042e-78	2.14418	1	0.984	7.84727685261629e-74	13	EC1	mt-Co1
1.25123508204057e-21	2.14353	0.393	0.091	1.98058001136203e-17	15	OG	Art4
7.53290017341768e-70	2.14347	0.525	0.169	1.19238276845028e-65	6	CN-M2	Scd2
8.03311528193141e-23	2.1432	0.288	0.074	1.27156181797692e-18	14	rep HEP	Adora1
2.5633933999304e-65	2.14315	0.478	0.146	4.05759541274983e-61	6	CN-M2	Tmem173
2.61782556118963e-38	2.14312	0.253	0.065	4.14375608080707e-34	6	CN-M2	P2rx7
5.16727141370885e-48	2.14226	0.654	0.209	8.17927392075975e-44	14	rep HEP	Gale
1.8414152649605e-61	2.14155	0.833	0.307	2.91477622290598e-57	14	rep HEP	Ces1b
2.8532147079552e-76	2.14109	0.531	0.159	4.51635356122228e-72	6	CN-M2	AU020206
5.86338547715786e-56	2.14056	0.673	0.181	9.28115287179318e-52	14	rep HEP	Depdc7
5.38190148538501e-37	2.14053	0.258	0.07	8.51901186121593e-33	6	CN-M2	Ldhb
3.17843549994297e-44	2.14025	0.764	0.186	5.03114555285973e-40	15	OG	Ccl19
1.01631241526144e-55	2.14005	0.587	0.149	1.60872092211733e-51	12	HEP2	Cyp7a1
5.06520787795278e-24	2.14	0.321	0.086	8.01771755001146e-20	14	rep HEP	Epha1
4.00180440625027e-30	2.13994	0.607	0.16	6.33445619465355e-26	15	OG	Rab3il1
2.15468502329919e-36	2.13956	0.307	0.08	3.41065092338028e-32	9	CN	Rassf2
2.49846784182806e-38	2.1395	0.317	0.1	3.95482474682963e-34	6	CN-M2	Frzb
3.2686345883013e-41	2.13948	0.742	0.184	5.17392168982212e-37	15	OG	mt-Nd4l
2.91590660513791e-45	2.13892	0.978	0.431	4.6155885652728e-41	15	OG	Lum
1.82590920630379e-36	2.13869	0.697	0.183	2.89023168265827e-32	15	OG	Calhm6
4.12545530578675e-22	2.13869	0.263	0.064	6.53018320352985e-18	14	rep HEP	Ccdc162
2.63862468749309e-23	2.13837	0.282	0.07	4.17667901783282e-19	14	rep HEP	Trim7
2.35548528756197e-85	2.13829	0.572	0.132	3.72849766168185e-81	9	CN	Slc16a3
3.02713357091488e-37	2.13815	0.284	0.068	4.79164972940116e-33	9	CN	Cxcr4
2.48729256080716e-43	2.1378	0.251	0.057	3.93713539450165e-39	7	HEP5	Gm31583
1.78196854002958e-34	2.13777	0.73	0.22	2.82067800201282e-30	15	OG	Prcp
6.10653195170107e-28	2.13701	0.551	0.143	9.66602942634763e-24	15	OG	Calcrl
3.45098782517052e-38	2.13611	0.91	0.397	5.46256862846241e-34	15	OG	Gm10076
1.87635093017714e-101	2.1351	0.697	0.235	2.9700758873774e-97	6	CN-M2	Nrros
3.84660287081304e-34	2.13425	0.678	0.529	6.08878768420996e-30	8	CN-M1	Icam1
9.32941398247786e-41	2.13391	0.487	0.123	1.47675293928642e-36	14	rep HEP	Oxnad1
3.64061667724601e-77	2.13378	0.994	0.584	5.76273213841271e-73	14	rep HEP	Angptl8
5.96687604176839e-36	2.1337	0.888	0.623	9.44496808651518e-32	12	HEP2	Glul
1.64057844934969e-64	2.13344	0.394	0.098	2.59687162747563e-60	6	CN-M2	Arl5c
2.94909996058453e-34	2.13292	0.346	0.073	4.66813032760925e-30	14	rep HEP	Ddx3y
7.01829460610255e-58	2.13274	0.783	0.557	1.11092585319997e-53	1	HEP1	Gstm3
1.08659462285231e-24	2.13262	0.314	0.081	1.71997062851292e-20	14	rep HEP	Tpd52l1
2.50910067212083e-77	2.13221	0.951	0.37	3.97165545390006e-73	13	EC1	mt-Nd5
3.22210827191372e-35	2.13153	0.423	0.106	5.10027518361223e-31	14	rep HEP	Inhbe
7.43499728514809e-120	2.13118	0.633	0.149	1.17688572026609e-115	6	CN-M2	Ccr1
3.07981865408069e-60	2.13104	0.331	0.073	4.87504494754433e-56	6	CN-M2	Clec5a
2.73707656105617e-37	2.13051	0.571	0.191	4.3325184884958e-33	14	rep HEP	Tstd3
1.36852485461748e-54	2.13049	0.378	0.106	2.166237992374e-50	6	CN-M2	Cers5
5.38906398444125e-54	2.13042	0.75	0.256	8.53034938097205e-50	14	rep HEP	Mocos
1.05483462993728e-22	2.12967	0.314	0.087	1.66969773572771e-18	14	rep HEP	Mpv17l
9.6134499412642e-153	2.12925	0.774	0.241	1.52171299120271e-148	3	HEP4	Gstt3
1.78857305057196e-63	2.12916	0.782	0.234	2.83113228175035e-59	14	rep HEP	Dut
1.66083861910995e-43	2.12884	0.635	0.209	2.62894145018914e-39	14	rep HEP	Coa7
2.47209820301362e-66	2.12881	0.872	0.324	3.91308424555026e-62	14	rep HEP	Gm11789
9.63678013038379e-30	2.12856	0.708	0.226	1.52540592683845e-25	15	OG	Alas2
1.5832890680199e-89	2.12854	1	0.782	2.50618826576869e-85	14	rep HEP	Ebpl
4.42710951206008e-34	2.12755	0.356	0.125	7.00767164663991e-30	8	CN-M1	Herc6
6.90457216614049e-41	2.12717	0.921	0.408	1.09292472817838e-36	15	OG	Serpina3g
6.16507792685014e-93	2.12693	1	0.967	9.75870185041109e-89	14	rep HEP	Apoc4
1.32451811597139e-98	2.12677	0.663	0.157	2.09657972577112e-94	9	CN	Ccr1
1.9893847517305e-127	2.12656	0.875	0.381	3.1489971235142e-123	6	CN-M2	Tpm4
2.71564414421988e-40	2.12653	0.275	0.073	4.29859311588566e-36	6	CN-M2	Fmnl3
4.76456036383192e-152	2.12628	0.997	0.58	7.54182259990955e-148	6	CN-M2	S100a6
1.07076305438094e-29	2.12556	0.899	0.48	1.69491083877958e-25	15	OG	Aqp8
1.88380770176194e-42	2.12544	0.596	0.186	2.98187921111898e-38	14	rep HEP	Epb41l5
1.17800368048577e-21	2.12523	0.269	0.067	1.86466202584093e-17	14	rep HEP	Pcgf6
8.67079304845002e-102	2.12475	0.98	0.563	1.37249983163915e-97	10	EC2	Cyp2c50
6.79477505238165e-31	2.12474	0.391	0.102	1.07554494304149e-26	14	rep HEP	Slc10a2
6.48919943926102e-100	2.12416	0.848	0.319	1.02717537924063e-95	9	CN	Ms4a6d
1.09382121840979e-51	2.12412	1	0.926	1.73140960662085e-47	15	OG	Cst3
6.7210468722878e-61	2.12365	0.846	0.319	1.06387450941444e-56	14	rep HEP	Srd5a1
1.31549012307086e-63	2.12343	0.5	0.166	2.08228931580886e-59	6	CN-M2	Lamc1
1.69586861175315e-116	2.12327	0.992	0.646	2.68439042554406e-112	9	CN	Pkm
4.96095878208104e-86	2.12191	1	0.979	7.85270165615608e-82	13	EC1	mt-Cytb
8.30019809896215e-146	2.12179	0.989	0.672	1.31383835708472e-141	6	CN-M2	Sh3bgrl3
4.95172572165826e-19	2.12172	0.371	0.091	7.83808664481285e-15	15	OG	Rabepk
4.19255034618598e-42	2.12123	0.615	0.204	6.63638794297779e-38	14	rep HEP	Uck1
3.56771526201983e-76	2.12104	0.439	0.085	5.6473364882512e-72	9	CN	Arg2
1.22381242214801e-46	2.12055	0.647	0.207	1.93717268301809e-42	14	rep HEP	Anks4b
1.17711017853613e-75	2.11971	0.693	0.236	1.86324770160485e-71	9	CN	Clec4a2
1.00424365322188e-28	2.11907	0.34	0.082	1.58961727868491e-24	14	rep HEP	Itih5
3.77690540423019e-63	2.11878	0.814	0.276	5.97846356435597e-59	14	rep HEP	Srxn1
3.24446693005292e-15	2.11771	0.348	0.098	5.13566670358076e-11	15	OG	Smad6
2.14835184611243e-18	2.11674	0.256	0.071	3.40062613721136e-14	14	rep HEP	Gm10658
1.10650811369776e-92	2.11585	1	0.902	1.75149169317219e-88	14	rep HEP	Slc38a3
1.32264240529329e-32	2.11515	0.436	0.12	2.09361066333876e-28	14	rep HEP	Gm20319
6.52520788652347e-68	2.11506	0.598	0.183	1.0328751563578e-63	9	CN	Gng2
1.30346448871017e-43	2.11496	0.596	0.177	2.06325393917933e-39	14	rep HEP	Pkp2
2.18429683947571e-21	2.11448	0.393	0.092	3.45752346720611e-17	15	OG	Lxn
1.65409097133769e-15	2.11444	0.662	0.549	2.61826059853043e-11	8	CN-M1	Slpi
1.62424193807603e-40	2.11411	0.261	0.066	2.57101256378055e-36	6	CN-M2	Sox4
1.25771971638827e-20	2.1139	0.494	0.153	1.99084453907099e-16	15	OG	Guca1a
2.46645244332007e-44	2.11251	0.294	0.076	3.90414757253134e-40	6	CN-M2	Tbc1d9
8.28294137505696e-62	2.11235	0.389	0.099	1.31110679025777e-57	6	CN-M2	Sirpb1c
2.02825502254501e-25	2.11138	0.321	0.081	3.21052487518649e-21	14	rep HEP	Zfp367
2.19023821307946e-36	2.11137	0.428	0.176	3.46692806748348e-32	8	CN-M1	Arrdc4
1.26817352983891e-52	2.11097	1	0.957	2.007391880382e-48	15	OG	Rps28
1.00600256139766e-65	2.11067	0.514	0.17	1.59240145443635e-61	6	CN-M2	AI506816
3.06335370093293e-25	2.11027	0.353	0.099	4.84898257320673e-21	14	rep HEP	Gm45716
1.05875711310149e-74	2.11007	0.955	0.518	1.67590663432835e-70	14	rep HEP	Dhcr7
2.48524317197127e-123	2.10954	0.996	0.677	3.93389141691333e-119	9	CN	Sh3bgrl3
6.38296236373362e-26	2.10925	0.25	0.079	1.0103591125554e-21	8	CN-M1	Slc2a6
1.30859951226673e-42	2.10883	1	0.516	2.07138216796701e-38	15	OG	Ptpn18
1.03090397191619e-90	2.10789	1	0.939	1.63181789714613e-86	14	rep HEP	Acox1
1.58036256590092e-58	2.10769	0.475	0.161	2.50155590556457e-54	6	CN-M2	P3h1
8.03812086180663e-52	2.10683	1	0.951	1.27235415121537e-47	15	OG	Rpl17
3.86232933672776e-32	2.1068	0.474	0.145	6.11368110710638e-28	14	rep HEP	Reep4
5.47988105021073e-52	2.10662	0.705	0.225	8.67410371437857e-48	14	rep HEP	Mindy3
1.37643409605678e-19	2.10578	0.427	0.115	2.17875753064827e-15	15	OG	Gpx7
2.09402790234251e-21	2.10571	0.25	0.059	3.31463676661797e-17	14	rep HEP	Atp23
9.05959069333039e-21	2.10516	0.288	0.079	1.43404261084727e-16	14	rep HEP	Erc2
2.20997268886568e-41	2.10511	0.482	0.123	3.49816576920548e-37	13	EC1	Jam2
1.79238375948708e-25	2.10483	0.327	0.086	2.8371642528921e-21	14	rep HEP	Gbp2b
4.22440334753989e-36	2.10457	0.288	0.072	6.68680805882088e-32	9	CN	Ubash3b
1.99065344208729e-20	2.10348	0.282	0.077	3.15100533347997e-16	14	rep HEP	Prim1
1.08804930691277e-52	2.10339	1	0.952	1.72227324791222e-48	15	OG	Rps14
2.63725028463417e-17	2.10217	0.348	0.089	4.17450347554743e-13	15	OG	Tgfb1i1
4.10255256630879e-19	2.10129	0.348	0.081	6.49393045721019e-15	15	OG	Ptgfrn
2.85136560914996e-44	2.10082	0.256	0.058	4.51342662272347e-40	6	CN-M2	Dubr
5.32656275204159e-32	2.10027	0.431	0.179	8.43141618020663e-28	8	CN-M1	Mcemp1
1.76421146138686e-90	2.10022	0.48	0.126	2.79257032222927e-86	3	HEP4	Gm13775
7.59054187560154e-40	2.09962	0.549	0.165	1.20150687348897e-35	13	EC1	Hspa13
6.94518859011985e-22	2.09906	0.427	0.107	1.09935390193007e-17	15	OG	Slamf8
1.14343153009778e-120	2.0988	1	0.556	1.80993776899178e-116	9	CN	Vim
1.31419790564244e-56	2.09809	0.383	0.104	2.08024386484141e-52	6	CN-M2	Ggta1
2.20836515561816e-42	2.09774	0.978	0.521	3.49562120482799e-38	15	OG	Rbm3
8.45527549563934e-74	2.09753	0.949	0.472	1.33838555820475e-69	14	rep HEP	Htatip2
6.70811139997761e-48	2.09748	0.596	0.161	1.06182695350246e-43	14	rep HEP	Snx7
1.95219077304095e-84	2.09747	1	0.937	3.09012277464652e-80	14	rep HEP	Ass1
1.63789644608481e-20	2.09747	0.483	0.144	2.59262628450764e-16	15	OG	Pdzk1ip1
5.38028961990623e-29	2.0969	0.372	0.097	8.51646043934956e-25	14	rep HEP	Kctd9
5.47947882701447e-17	2.09681	0.36	0.095	8.6734670352812e-13	15	OG	Slc37a2
3.71523770135527e-56	2.0961	1	1	5.88084975747525e-52	11	NC-P	Fth1
4.14576066827844e-41	2.09563	0.3	0.084	6.56232456181794e-37	6	CN-M2	Sept8
2.5160968449103e-44	2.09543	0.615	0.188	3.98272969580851e-40	14	rep HEP	Ociad2
3.09096418956025e-33	2.09538	0.888	0.408	4.89268721565493e-29	15	OG	Serpina12
3.61084020392645e-71	2.09525	0.503	0.15	5.71559895879518e-67	6	CN-M2	Csf2rb2
2.48100766193011e-42	2.09435	0.532	0.14	3.92718702806917e-38	14	rep HEP	Mki67
6.47280751751728e-34	2.0943	0.488	0.234	1.02458070194781e-29	8	CN-M1	Nfkbiz
2.86522961688584e-26	2.09398	0.293	0.069	4.53537196056859e-22	13	EC1	Hapln4
7.66949178085224e-40	2.09397	0.899	0.346	1.2140038539911e-35	15	OG	Clec12a
7.25549137141816e-23	2.09289	0.472	0.122	1.14847172918178e-18	15	OG	Cxcl14
1.16853468551371e-64	2.09288	0.406	0.103	1.84967355369965e-60	6	CN-M2	Fos
2.39697647128411e-38	2.09184	0.5	0.138	3.79417405639562e-34	14	rep HEP	Pfkfb1
2.89129145764677e-53	2.09103	0.283	0.07	4.57662524830907e-49	3	HEP4	Ptgds
1.83383882637425e-18	2.09047	0.36	0.088	2.90278347826779e-14	15	OG	Adamtsl2
3.05599047585052e-39	2.08972	0.397	0.139	4.83732732422378e-35	8	CN-M1	Gadd45a
8.74378970232579e-23	2.08936	0.308	0.083	1.38405447198115e-18	14	rep HEP	Shf
1.05039669335994e-45	2.08918	0.654	0.214	1.66267292591945e-41	14	rep HEP	Igsf5
3.87109643240417e-22	2.08897	0.494	0.135	6.12755854285256e-18	15	OG	Wls
1.00935343345573e-39	2.08845	0.545	0.158	1.59770554981707e-35	14	rep HEP	Nkiras1
5.94788371102857e-47	2.08819	0.667	0.21	9.41490512618712e-43	14	rep HEP	Fxn
3.37170915623708e-14	2.08807	0.27	0.065	5.33707842340767e-10	15	OG	Fst
1.35527584074092e-90	2.08796	0.833	0.348	2.1452661283088e-86	9	CN	Emp3
1.33782434996624e-19	2.08753	0.25	0.064	2.11764216356157e-15	14	rep HEP	Adam11
2.11217413129382e-21	2.08739	0.449	0.12	3.34336043242499e-17	15	OG	Zfand4
6.29011750014295e-59	2.08739	0.394	0.106	9.95662699097628e-55	6	CN-M2	Slc1a5
6.36454937486598e-131	2.0873	0.922	0.507	1.00744452054754e-126	6	CN-M2	Flna
4.57416040643316e-32	2.08646	0.409	0.169	7.24043850734305e-28	8	CN-M1	Oasl1
8.86478796084191e-18	2.08638	0.393	0.108	1.40320728632167e-13	15	OG	Scimp
7.0460037952579e-95	2.08622	0.994	0.771	1.11531194075137e-90	13	EC1	Serpina3m
1.62498746465643e-43	2.08609	0.59	0.17	2.57219265780466e-39	14	rep HEP	Mpst
2.5307561919184e-36	2.08555	0.462	0.122	4.00593397618763e-32	14	rep HEP	Rfc3
7.00872337817236e-42	2.08482	0.331	0.101	1.1094108235309e-37	6	CN-M2	Osmr
2.85145785556349e-24	2.08437	0.327	0.088	4.51357263957144e-20	14	rep HEP	Lipt2
2.03279740907464e-33	2.08348	0.378	0.091	3.21771501882425e-29	13	EC1	Irs2
4.56492159956104e-35	2.08334	0.472	0.085	7.22581439994516e-31	15	OG	Ctsk
1.18766004880208e-33	2.08284	0.629	0.154	1.87994709124881e-29	15	OG	Agtrap
8.9826173069848e-56	2.08272	0.769	0.265	1.42185849352262e-51	14	rep HEP	Cutal
2.8779251867863e-28	2.08195	0.55	0.326	4.55546777816404e-24	8	CN-M1	Slfn2
1.13931501010922e-85	2.08144	1	0.808	1.80342172950188e-81	14	rep HEP	Hmgcs1
3.35673061901637e-21	2.08092	0.288	0.078	5.31336889684101e-17	14	rep HEP	4833411C07Rik
2.47199300091613e-74	2.0808	0.614	0.173	3.91291772115014e-70	9	CN	Syk
1.09695887422006e-39	2.07963	0.538	0.155	1.73637620200293e-35	14	rep HEP	Thpo
5.52657765328239e-94	2.07893	0.531	0.127	8.74801976738069e-90	6	CN-M2	Bst1
3.87669790290633e-27	2.07891	0.449	0.097	6.13642511051044e-23	15	OG	Mmp23
4.25408746176951e-40	2.07866	0.764	0.209	6.73379504323495e-36	15	OG	Fbn1
1.25349836788702e-59	2.07823	0.827	0.277	1.98416256652837e-55	14	rep HEP	Apol9a
6.1210092824671e-96	2.07821	0.461	0.092	9.68894559321717e-92	6	CN-M2	Traf1
4.53127993756233e-12	2.07774	0.315	0.097	7.17256301316742e-08	15	OG	Rasgrp3
1.36221483965314e-37	2.07773	0.737	0.337	2.15624986968695e-33	14	rep HEP	Tstd1
1.90476327035038e-74	2.07734	0.531	0.161	3.01504978063761e-70	6	CN-M2	Lpcat2
5.73751501445531e-22	2.07671	0.663	0.264	9.08191251638131e-18	15	OG	Cib3
2.14804158337137e-119	2.07664	0.742	0.171	3.40013502231854e-115	9	CN	Thbs1
1.38861523456564e-28	2.07603	0.34	0.082	2.19803905479395e-24	14	rep HEP	Gm19696
5.36391690975238e-47	2.07519	0.622	0.188	8.49054407644705e-43	13	EC1	Acnat2
5.82225781663173e-49	2.07473	0.382	0.091	9.21605189794637e-45	10	EC2	Acot3
5.40719462377446e-26	2.07449	0.573	0.165	8.55904836997259e-22	15	OG	Mzt2
3.21612916303249e-51	2.07443	1	0.947	5.09081085216412e-47	15	OG	Rps19
6.30650356380006e-51	2.07431	0.372	0.108	9.98256449113912e-47	6	CN-M2	Rab34
4.78187808374459e-70	2.07394	0.387	0.102	7.56923481875931e-66	3	HEP4	Cyp3a59
2.29282495307019e-43	2.0738	0.634	0.213	3.62931261821481e-39	13	EC1	Abhd2
2.01484290284615e-39	2.07338	0.538	0.155	3.18929483091517e-35	14	rep HEP	Pdhx
2.06622783733864e-110	2.07329	0.981	0.568	3.27063204372334e-106	9	CN	Lgals1
9.12874136458292e-44	2.07251	0.989	0.503	1.44498847059983e-39	15	OG	Col1a1
1.58701555100197e-67	2.07219	0.519	0.166	2.51208691568102e-63	6	CN-M2	Ccr2
1.14034728069001e-29	2.07177	0.417	0.118	1.80505571060422e-25	14	rep HEP	Car5a
1.20149322735978e-20	2.07177	0.256	0.064	1.90184362958779e-16	14	rep HEP	Acpp
1.49390627283831e-89	2.07149	1	0.823	2.36470423927576e-85	14	rep HEP	Bola3
2.62242216202987e-97	2.0714	1	0.96	4.15103204027708e-93	13	EC1	Itih4
1.51942976484669e-53	2.07101	1	0.978	2.40510537477582e-49	15	OG	Rpl32
6.60640312270902e-68	2.07074	0.897	0.374	1.04572755029361e-63	14	rep HEP	Acy3
9.59727499323987e-51	2.0707	0.91	0.252	1.51915265867994e-46	15	OG	Cxcl5
1.49567122578966e-61	2.0704	0.827	0.283	2.36749798330245e-57	14	rep HEP	Mup10
6.0978133603445e-43	2.06999	0.314	0.089	9.65222876808931e-39	6	CN-M2	Chsy1
4.11681255851789e-39	2.06895	0.314	0.078	6.51650259887797e-35	9	CN	Abcc1
2.0015410006974e-25	2.06892	0.34	0.091	3.16823925000391e-21	14	rep HEP	Il17rb
2.00986456441275e-41	2.06794	0.571	0.168	3.18141461900894e-37	14	rep HEP	Tmem30b
1.01068405896205e-15	2.0679	0.258	0.055	1.59981179693103e-11	15	OG	Tead2
3.29250097298421e-137	2.06752	0.837	0.206	5.2116997901367e-133	9	CN	Clec4e
6.39096634057502e-38	2.06751	0.25	0.064	1.01162606204962e-33	6	CN-M2	Tbc1d10c
1.09607745293575e-36	2.06738	0.708	0.186	1.73498100025199e-32	15	OG	Adamts2
3.47535785051121e-51	2.06737	0.756	0.284	5.5011439415742e-47	14	rep HEP	Tmx2
2.90711383499131e-53	2.0671	0.5	0.154	4.60167048940774e-49	9	CN	Lrrc25
9.14085589569618e-89	2.06701	1	0.865	1.44690607972975e-84	14	rep HEP	Nat8f2
1.32422694317482e-29	2.06695	0.385	0.101	2.09611882835143e-25	14	rep HEP	Dbp
1.4374805084983e-34	2.06654	0.787	0.264	2.27538789690196e-30	15	OG	Bok
2.1157137033442e-35	2.06586	0.494	0.143	3.34896322102353e-31	14	rep HEP	Grtp1
1.2569271272232e-22	2.06511	0.276	0.068	1.9895899496816e-18	14	rep HEP	Gm15318
4.97333993577774e-24	2.06505	0.685	0.277	7.87229978434259e-20	15	OG	Ptprb
9.90402396355758e-41	2.06483	0.292	0.08	1.56770795319153e-36	6	CN-M2	Rhoj
6.01207096460265e-37	2.06433	0.571	0.187	9.51650712986953e-33	14	rep HEP	Mgmt
4.94279340650954e-28	2.06387	0.436	0.139	7.82394768316396e-24	14	rep HEP	Tmem62
5.0927765618904e-16	2.06384	0.326	0.083	8.06135601981631e-12	15	OG	Prss23
3.1595114616068e-45	2.06346	0.583	0.162	5.0011906925774e-41	14	rep HEP	Cblc
1.01947103025142e-60	2.06338	0.841	0.336	1.61372069378497e-56	13	EC1	Gm29966
3.77318577764104e-34	2.06289	0.345	0.16	5.972575767428e-30	0	M	Aebp1
1.74532721718817e-64	2.06261	0.496	0.125	2.76267845208715e-60	9	CN	Trbc2
1.38389684345872e-78	2.06242	0.589	0.194	2.1905703135108e-74	6	CN-M2	Myo1f
3.37828244009658e-17	2.06241	0.461	0.147	5.34748327442887e-13	15	OG	Fitm1
1.89288864435855e-12	2.06226	0.303	0.089	2.99625343515515e-08	15	OG	Gbp2b
9.83649726265693e-15	2.06215	0.258	0.058	1.55701915170597e-10	15	OG	Usf1
1.849694303281e-33	2.062	0.455	0.127	2.9278811126635e-29	14	rep HEP	Mmp15
9.17384575585553e-70	2.06175	0.643	0.196	1.45212804469437e-65	11	NC-P	Ccl3
9.99041725813766e-25	2.06153	0.438	0.101	1.58138314779061e-20	15	OG	Loxl2
8.25532366437441e-20	2.06134	0.381	0.199	1.30673518283382e-15	8	CN-M1	Entpd1
1.68744124434537e-16	2.0612	0.36	0.097	2.67105074567429e-12	15	OG	Nkg7
6.25515792811088e-84	2.06111	0.625	0.208	9.90128948440671e-80	6	CN-M2	Cd93
2.72440696969167e-41	2.06087	0.532	0.143	4.31246379232495e-37	14	rep HEP	Tmem82
2.31371625905243e-87	2.06085	0.656	0.223	3.6623814664541e-83	6	CN-M2	Cnn2
3.77154940839464e-19	2.06069	0.326	0.071	5.96998555854788e-15	15	OG	Htra3
8.23675677985194e-82	2.06058	1	0.988	1.30379623068276e-77	13	EC1	Orm1
7.35208741644141e-78	2.06048	0.583	0.188	1.16376191714851e-73	6	CN-M2	Ms4a6b
6.69367764184676e-46	2.05989	0.606	0.301	1.05954223392792e-41	8	CN-M1	Socs3
3.88340399272558e-25	2.05965	0.346	0.094	6.14704018008532e-21	14	rep HEP	Sucnr1
3.30400575779235e-31	2.05942	0.429	0.12	5.22991071400951e-27	14	rep HEP	Cenpv
2.30740562969763e-58	2.05939	0.313	0.079	3.65239237124838e-54	3	HEP4	Odf3b
6.03650762417028e-151	2.05864	0.992	0.639	9.55518791829914e-147	6	CN-M2	Pkm
3.78074898995197e-80	2.05821	0.761	0.288	5.98454757619497e-76	9	CN	Pilra
1.24611455877339e-17	2.05803	0.25	0.069	1.97247473508239e-13	14	rep HEP	Zmynd19
7.11894469754967e-50	2.05755	1	0.902	1.12685775617514e-45	15	OG	Rpl12
3.72069064815843e-70	2.05751	1	0.849	5.88948122696998e-66	13	EC1	mt-Nd1
5.81225306705159e-87	2.05743	0.494	0.118	9.20021537983597e-83	6	CN-M2	Mefv
1.44831967638043e-50	2.05722	1	0.932	2.29254521574259e-46	15	OG	Rps18
3.84123676620185e-44	2.05582	0.333	0.097	6.0802936772209e-40	6	CN-M2	Ripk3
2.03461787281684e-21	2.0551	0.404	0.098	3.22059663088178e-17	15	OG	Gpx8
1.08853772083861e-14	2.05423	0.326	0.089	1.72304635831543e-10	15	OG	Fig4
2.75556905303153e-98	2.05379	0.739	0.204	4.36179025404361e-94	9	CN	Bcl2a1b
1.08214287483636e-56	2.05367	0.535	0.157	1.71292395657847e-52	10	EC2	Cyp2c69
7.45978164705962e-21	2.05364	0.449	0.121	1.18080883691307e-16	15	OG	Cavin1
1.74125511567946e-125	2.05323	0.9	0.448	2.75623272260902e-121	6	CN-M2	Cxcl16
6.04820718898955e-94	2.05301	0.783	0.353	9.57370715945157e-90	6	CN-M2	Tmem123
7.75197499161858e-19	2.05179	0.269	0.075	1.22706012142331e-14	14	rep HEP	Fyb2
2.4766833765171e-14	2.05154	0.348	0.102	3.92034211668892e-10	15	OG	Prkd2
1.56823697252802e-67	2.05141	0.923	0.376	2.4823623038146e-63	14	rep HEP	Pex16
3.72040897090483e-45	2.05118	0.583	0.159	5.88903536004525e-41	14	rep HEP	Hmgn5
8.41837987529062e-87	2.05106	0.457	0.117	1.33254535045975e-82	3	HEP4	Cyp2b10
1.55071718794377e-40	2.04966	0.532	0.146	2.45463023679619e-36	14	rep HEP	Dtnb
1.67539453989537e-83	2.04947	0.795	0.314	2.65198201720038e-79	9	CN	Ncf1
5.21850356240656e-32	2.04941	0.798	0.309	8.26036928893335e-28	15	OG	Lpl
2.57364064230703e-37	2.04906	0.685	0.169	4.07381577270779e-33	15	OG	Col6a1
1.53014791384794e-25	2.04906	0.517	0.134	2.4220711328299e-21	15	OG	2310022B05Rik
9.21147644076018e-45	2.04881	0.512	0.212	1.45808460580793e-40	8	CN-M1	Birc3
1.53365105527188e-48	2.04866	0.673	0.221	2.42761625538986e-44	14	rep HEP	Alas2
3.06530180794045e-45	2.04843	0.583	0.161	4.85206623178895e-41	14	rep HEP	Mob3b
1.53181506636979e-51	2.04824	1	0.953	2.42471006855675e-47	15	OG	Rplp0
1.21885604119857e-95	2.04798	0.644	0.199	1.92932722761322e-91	6	CN-M2	Map4k4
1.14753952588305e-52	2.04777	0.606	0.24	1.81644031552029e-48	9	CN	S100a4
3.05970195049986e-105	2.04726	0.758	0.277	4.84320221744622e-101	6	CN-M2	Vsir
1.32889862119738e-57	2.04722	0.795	0.267	2.10351362749333e-53	14	rep HEP	Prxl2b
2.39070628486114e-22	2.04689	0.308	0.084	3.7842489783067e-18	14	rep HEP	Dnph1
4.64102463893687e-18	2.04689	0.282	0.084	7.34627790097316e-14	14	rep HEP	Fancl
6.52346431991192e-61	2.04677	0.494	0.149	1.03259916719886e-56	8	CN-M1	mt-Atp8
1.9443268774389e-24	2.04629	0.327	0.087	3.07767501429804e-20	14	rep HEP	Sult1b1
8.69036965241614e-70	2.04553	0.968	0.544	1.37559861228095e-65	14	rep HEP	Smlr1
1.40743864618365e-42	2.04547	1	0.812	2.2278346330441e-38	15	OG	Cd52
1.30960888940497e-15	2.0454	0.337	0.089	2.07297991103913e-11	15	OG	Rcc1
4.88328352030527e-26	2.04534	0.742	0.3	7.72974948429121e-22	15	OG	Fkbp11
8.06400040953259e-69	2.04533	0.575	0.207	1.27645062482491e-64	6	CN-M2	Dab2
7.18450696487436e-42	2.04532	0.73	0.171	1.13723560746996e-37	15	OG	Tagln
2.90606545966815e-24	2.04528	0.461	0.111	4.60001101610872e-20	15	OG	Pigu
8.17270027319022e-52	2.04526	1	0.907	1.29365672624328e-47	15	OG	Rpl27
5.27044334323557e-54	2.04513	0.872	0.401	8.34258476800759e-50	14	rep HEP	Tmem19
2.46632473975022e-86	2.0451	0.697	0.263	3.90394543055063e-82	6	CN-M2	Ms4a6c
3.49108117434846e-144	2.04504	1	0.972	5.52603239087618e-140	6	CN-M2	Psap
1.3405399709125e-20	2.04484	0.309	0.135	2.12194071995739e-16	8	CN-M1	Cd86
2.97735747579138e-89	2.04474	0.879	0.445	4.71285914843018e-85	9	CN	Cd38
1.03602868571381e-63	2.04446	0.859	0.319	1.63992980661638e-59	14	rep HEP	Prxl2a
4.48099774908876e-54	2.04424	1	0.995	7.09297133703259e-50	15	OG	Rpl41
1.01996873222945e-22	2.04378	0.517	0.146	1.614508506246e-18	15	OG	Tnfsf13
3.68552228036776e-31	2.04305	0.277	0.075	5.83381321759412e-27	9	CN	Mirt2
2.91086676454133e-143	2.04287	0.967	0.517	4.60761100159248e-139	6	CN-M2	S100a11
2.77921931870659e-91	2.04273	1	0.95	4.39922625958066e-87	14	rep HEP	Adh1
5.4295646308514e-48	2.04255	0.731	0.265	8.59445785417467e-44	14	rep HEP	Coa6
5.09903489502295e-16	2.04239	0.348	0.093	8.07126233533183e-12	15	OG	Scarf1
1.23497068669571e-40	2.04228	0.551	0.159	1.95483509997064e-36	14	rep HEP	Baiap2l1
1.45014166392818e-52	2.04168	1	0.986	2.29542923983192e-48	15	OG	Rplp1
2.22734836139246e-88	2.04167	0.994	0.85	3.52566972124813e-84	13	EC1	Crp
1.87517400105175e-44	2.04022	0.353	0.108	2.96821292626482e-40	6	CN-M2	Tctex1d2
2.48069552361158e-98	2.03967	0.898	0.425	3.92669294432477e-94	9	CN	Pla2g7
2.4903389327531e-87	2.03954	0.736	0.298	3.94195749665488e-83	6	CN-M2	Ckb
1.18392984316691e-61	2.03949	0.885	0.395	1.8740425487489e-57	14	rep HEP	Rnf103
4.59623477747996e-88	2.03907	1	0.931	7.27538002927303e-84	13	EC1	Lcn2
1.10806642719189e-76	2.03805	0.589	0.197	1.75395834760204e-72	6	CN-M2	Lbh
3.2300586877134e-44	2.03802	0.628	0.198	5.11285989678154e-40	14	rep HEP	Aacs
9.3466178013537e-71	2.03735	0.949	0.423	1.47947613177628e-66	14	rep HEP	Nags
4.78544687527363e-60	2.03733	0.393	0.121	7.57488385887063e-56	3	HEP4	Gsta2
2.04656080649965e-13	2.03721	0.326	0.095	3.23950110060830e-09	15	OG	Npr1
3.37997267238322e-131	2.03709	1	0.979	5.3501587431154e-127	10	EC2	mt-Cytb
2.45374420837777e-76	2.0367	0.637	0.272	3.88403170744117e-72	2	HEP0	Mup1
2.43401186180437e-22	2.03668	0.299	0.082	3.85279737605014e-18	13	EC1	Armcx4
3.61665188292414e-45	2.03541	0.615	0.18	5.72479826548062e-41	14	rep HEP	Ces2g
3.29229655323137e-37	2.03502	0.831	0.282	5.21137621410993e-33	15	OG	Slc11a1
1.1416694650337e-15	2.03481	0.326	0.084	1.80714859620185e-11	15	OG	Fzd4
1.56361232574035e-34	2.03473	0.481	0.215	2.47504195041439e-30	8	CN-M1	Bcl2a1b
9.74141321533405e-68	2.03447	0.929	0.456	1.54196829785523e-63	14	rep HEP	Avpi1
3.64557454683207e-104	2.03387	0.765	0.218	5.77057995018048e-100	9	CN	Gadd45b
1.23128765005743e-22	2.03357	0.276	0.067	1.94900522127591e-18	14	rep HEP	Chrna1os
6.34003188547599e-69	2.03357	0.55	0.185	1.00356364715199e-64	6	CN-M2	Cd84
3.30139514826411e-52	2.03317	1	0.973	5.22577838018726e-48	15	OG	Rps15a
1.93039878140772e-23	2.03309	0.321	0.086	3.05562823109027e-19	14	rep HEP	Nme4
3.18296547839881e-35	2.03187	0.483	0.183	5.03831605575748e-31	11	NC-P	Slfn4
3.37571540710183e-32	2.03178	0.719	0.222	5.34341991790148e-28	15	OG	Fkbp9
9.0375111633845e-82	2.03078	0.856	0.528	1.43054764205213e-77	9	CN	Adgre1
6.624469614235e-53	2.03069	1	0.946	1.04858729523726e-48	15	OG	Rps5
6.97823362044131e-46	2.03052	0.809	0.202	1.10458459977966e-41	15	OG	Trem2
5.85471829746893e-52	2.0305	1	0.955	9.26743359306357e-48	15	OG	Rps9
7.64361974391663e-81	2.03039	0.987	0.719	1.20990856926456e-76	14	rep HEP	Abcd3
3.55443747099724e-43	2.03021	0.667	0.23	5.62631907284152e-39	14	rep HEP	Tmem29
4.7244161926609e-16	2.02997	0.332	0.158	7.47827839136294e-12	11	NC-P	Asprv1
2.28732550925472e-35	2.02976	0.494	0.141	3.62060754859929e-31	14	rep HEP	Nanp
1.79120005796833e-144	2.02941	0.836	0.255	2.83529057175806e-140	6	CN-M2	Clec4d
1.78875367391011e-29	2.02923	0.397	0.107	2.83141819043231e-25	14	rep HEP	Haus7
2.40034314716266e-39	2.02882	0.326	0.083	3.79950316764378e-35	9	CN	Cd3d
6.60402781306971e-73	2.02864	1	0.891	1.0453515625308e-68	13	EC1	mt-Nd2
4.3079186183675e-75	2.02853	0.525	0.156	6.81900438101392e-71	6	CN-M2	Csf2ra
3.86671355683558e-34	2.02821	0.494	0.15	6.12062088911504e-30	13	EC1	Bmp2
1.96595496558098e-63	2.02804	0.91	0.448	3.11191011501814e-59	14	rep HEP	Lactb2
9.69062314707575e-46	2.02771	0.615	0.177	1.53392873795062e-41	14	rep HEP	D5Ertd579e
7.50071201859461e-33	2.02744	0.775	0.66	1.18728770542334e-28	8	CN-M1	Nfkbia
1.75549533658023e-54	2.02652	0.381	0.106	2.77877356827285e-50	6	CN-M2	Tlr13
2.99737335063024e-21	2.0265	0.348	0.074	4.7445422767126e-17	15	OG	Ccn5
4.6823621838253e-79	2.02646	1	0.719	7.41171110077707e-75	14	rep HEP	Ephx1
1.09980652704369e-34	2.02621	0.487	0.141	1.74088375165746e-30	14	rep HEP	Nudt12
7.33563776534346e-67	2.0262	0.517	0.167	1.16115810187622e-62	6	CN-M2	Otulinl
1.74706379326982e-34	2.02591	0.494	0.144	2.76542727836679e-30	14	rep HEP	C730027H18Rik.1
1.58161536300706e-67	2.02557	0.572	0.205	2.50353895810387e-63	6	CN-M2	Fkbp9
9.59397221703133e-30	2.02547	0.272	0.072	1.51862986223389e-25	10	EC2	Fmo2
1.45532150438915e-20	2.02498	0.295	0.083	2.30362840929758e-16	14	rep HEP	Slc1a4
2.8951614401299e-51	2.0249	0.347	0.092	4.58275104358161e-47	6	CN-M2	Far1
1.08824537252379e-29	2.02422	0.462	0.225	1.72258360016791e-25	8	CN-M1	Ifitm6
1.59834444765779e-19	2.02399	0.494	0.155	2.53001942619752e-15	15	OG	Bmp2
1.04172044798126e-80	2.0235	0.835	0.368	1.64893929710954e-76	10	EC2	Cyp2c54
4.68316613082448e-24	2.02349	0.494	0.129	7.41298366848206e-20	15	OG	Nid2
7.56470601430853e-19	2.02339	0.404	0.108	1.1974173150049e-14	15	OG	Ripk3
2.21300773498381e-96	2.02327	0.714	0.256	3.50296994370587e-92	6	CN-M2	Selplg
2.8571439114304e-47	2.02322	0.487	0.25	4.52257309740318e-43	0	M	Olfml3
1.16757409169277e-58	2.02296	0.456	0.142	1.84815302974048e-54	6	CN-M2	Arhgef2
1.80506036687381e-60	2.02275	0.827	0.279	2.85723005472456e-56	14	rep HEP	Mul1
6.47233036521344e-76	2.02248	0.578	0.19	1.02450517350964e-71	6	CN-M2	Pdlim7
1.20761234378033e-88	2.02246	1	0.847	1.91152957896989e-84	14	rep HEP	Qdpr
5.45305676011082e-29	2.02231	0.429	0.126	8.63164354557941e-25	14	rep HEP	Tfrc
4.49225128641975e-35	2.02192	0.319	0.099	7.11078456127383e-31	8	CN-M1	Arid5a
3.25748549216533e-36	2.02126	0.558	0.176	5.1562737855485e-32	14	rep HEP	Ttc23
3.35625575552715e-12	2.02116	0.27	0.073	5.31261723542393e-08	15	OG	Zbtb41
9.11824055271895e-51	2.02077	0.686	0.209	1.44332629708988e-46	14	rep HEP	Ciapin1
3.68693541635643e-34	2.02061	0.494	0.144	5.83605007055059e-30	14	rep HEP	Rdh5
4.98839676186239e-19	2.02056	0.308	0.095	7.89613323435198e-15	14	rep HEP	Sult2a7
1.12610957597329e-29	2.02042	0.391	0.104	1.78251884780813e-25	14	rep HEP	Sirt5
2.97660835225339e-20	2.02042	0.282	0.077	4.71167336078189e-16	14	rep HEP	Igsf11
3.82928436551596e-120	2.02017	0.996	0.763	6.06137422217522e-116	9	CN	Aldoa
7.25203126533072e-60	2.0196	0.891	0.386	1.1479240289892e-55	14	rep HEP	Pxdc1
5.50981314440841e-61	2.01945	0.45	0.135	8.72148322628407e-57	6	CN-M2	Morrbid
3.77666100131157e-75	2.01912	0.968	0.534	5.97807669897608e-71	14	rep HEP	Ldhd
1.40046731559275e-77	2.01911	0.994	0.567	2.21679971385176e-73	14	rep HEP	Hao1
8.70967917688108e-119	2.0191	0.854	0.499	1.37865511690851e-114	3	HEP4	Hsd17b6
5.94081469715197e-43	2.01879	0.39	0.11	9.40371558412185e-39	9	CN	Tlr13
3.06889633750279e-37	2.01871	0.558	0.175	4.85775601263317e-33	14	rep HEP	2310030G06Rik
5.80366471765809e-41	2.01843	1	0.895	9.18662088158099e-37	15	OG	mt-Nd4
3.36087320570265e-49	2.01838	0.567	0.149	5.31992619730673e-45	13	EC1	Crybb3
5.98331902198401e-29	2.01802	0.618	0.171	9.47099567989848e-25	15	OG	Maged2
5.35970513039475e-46	2.01799	0.379	0.097	8.48387725090185e-42	9	CN	Plp2
9.76074441753358e-58	2.0179	0.859	0.342	1.54502823385139e-53	14	rep HEP	Apol7a
1.26901001888944e-22	2.01787	0.472	0.123	2.0087159589001e-18	15	OG	Piezo1
1.47787061989545e-27	2.01752	0.742	0.308	2.3393214042325e-23	15	OG	Dag1
2.31574767337977e-55	2.01714	0.795	0.306	3.66559699219284e-51	14	rep HEP	Immp2l
1.98956616587967e-27	2.0169	0.404	0.117	3.14928428397092e-23	14	rep HEP	1700066M21Rik
1.59688612544844e-57	2.01685	0.795	0.273	2.52771104797234e-53	14	rep HEP	Echdc1
1.18878269546424e-16	2.01601	0.326	0.079	1.88172412865035e-12	15	OG	Ciita
2.20599038950138e-11	2.01577	0.27	0.077	3.49186218754173e-07	15	OG	P2ry14
2.03288906294246e-33	2.0156	0.281	0.082	3.21786009773161e-29	8	CN-M1	Tspan13
1.17189710006066e-14	2.0156	0.337	0.095	1.85499591968602e-10	15	OG	Sgce
9.02004135457825e-32	2.01529	0.474	0.142	1.42778234601619e-27	14	rep HEP	Notum
1.77811075652974e-126	2.01528	0.958	0.613	2.81457151651092e-122	6	CN-M2	Ucp2
9.45409365595566e-52	2.01512	0.731	0.238	1.49648848480122e-47	14	rep HEP	Sntb1
5.15353860963583e-47	2.01491	0.667	0.209	8.15753626519256e-43	14	rep HEP	Ptrh2
5.05863302218608e-81	2.01459	0.982	0.644	8.00731021081835e-77	13	EC1	Lpgat1
8.2361769630775e-27	2.01438	0.663	0.217	1.30370445148554e-22	15	OG	Ssbp4
5.65056794844974e-24	2.01392	0.584	0.179	8.94428400560109e-20	15	OG	Lhfp
2.06779108788554e-20	2.01377	0.282	0.077	3.27310651301402e-16	14	rep HEP	Dbr1
2.31722371905648e-116	2.01355	1	0.801	3.6679334248945e-112	9	CN	Cstb
2.42700355892017e-54	2.01343	0.788	0.267	3.84170393341474e-50	14	rep HEP	Smim22
1.32268314513787e-23	2.01306	0.34	0.096	2.09367515043873e-19	14	rep HEP	Psph
6.40343435944398e-136	2.0129	0.983	0.666	1.01359962475639e-131	6	CN-M2	Cyba
1.29914616571934e-83	2.01278	0.987	0.753	2.05641846571715e-79	14	rep HEP	Dnajc19
2.01047402221308e-48	2.01262	0.673	0.208	3.18237932976108e-44	14	rep HEP	Grb14
2.1743492665086e-30	2.01228	0.697	0.216	3.44177745395646e-26	15	OG	Lbh
2.99310104164806e-50	2.01199	1	0.779	4.73777963882471e-46	15	OG	Rpl35
3.82620329830876e-20	2.01165	0.427	0.111	6.05649720089294e-16	15	OG	Emp1
1.45573520447547e-94	2.01126	1	0.989	2.30428325516422e-90	14	rep HEP	Apoc3
3.26672050548782e-192	2.01103	1	0.928	5.17089188813667e-188	0	M	Cd74
1.14305415287865e-12	2.01061	0.27	0.071	1.80934041859161e-08	15	OG	Gins2
1.90149760523146e-44	2.01037	0.628	0.195	3.00988055932088e-40	14	rep HEP	2210408F21Rik
2.55300234612294e-37	2.01037	0.538	0.159	4.041147413678e-33	14	rep HEP	Rrm1
2.21851130345501e-16	2.01024	0.348	0.091	3.51168154223893e-12	15	OG	Fam241a
6.34521407577752e-53	2.0102	0.307	0.07	1.00438393605482e-48	7	HEP5	Mpo
3.15257109845516e-139	2.00938	0.928	0.413	4.99020479174468e-135	6	CN-M2	Pla2g7
3.44793250838401e-27	2.00893	0.596	0.166	5.45773236752105e-23	15	OG	P2ry6
9.31762938845327e-36	2.0089	0.512	0.247	1.47488755589827e-31	8	CN-M1	Serpina7
2.00672922629925e-40	2.00853	1	0.716	3.17645169230908e-36	15	OG	Ly6a
6.15099541922326e-24	2.00817	0.91	0.775	9.7364106490885e-20	14	rep HEP	Oat
7.83323030383977e-47	2.0079	0.724	0.268	1.2399220247948e-42	14	rep HEP	Chdh
5.03836568079106e-36	2.00772	0.558	0.184	7.97522903612417e-32	14	rep HEP	Mrps22
5.31609725595164e-22	2.00759	0.321	0.091	8.41485034644584e-18	14	rep HEP	Cenpl
5.53863894530649e-86	2.00756	0.994	0.758	8.76711158652565e-82	14	rep HEP	Coq8a
1.13555085587214e-22	2.00676	0.288	0.073	1.79746344976001e-18	14	rep HEP	Tfb1m
3.91660475643099e-50	2.00644	0.358	0.1	6.19959366895461e-46	6	CN-M2	Tlr1
1.13956550793066e-44	2.00615	0.609	0.174	1.80381824250344e-40	14	rep HEP	Trim2
1.34214797699771e-52	2.00542	0.417	0.104	2.12448603278967e-48	9	CN	Lat2
1.3082013809442e-53	2.00512	0.433	0.138	2.07075196589658e-49	6	CN-M2	Nfkbie
1.9757728547272e-55	2.00487	0.392	0.11	3.12745085174768e-51	6	CN-M2	Bcl2a1a
1.47311557794302e-54	2.00474	1	0.978	2.33179464832601e-50	15	OG	Rps21
6.38654160368244e-40	2.00414	0.955	0.548	1.01092567044689e-35	15	OG	Snrpd2
4.92118834591696e-44	2.00305	0.966	0.378	7.78974903275195e-40	15	OG	mt-Nd5
1.05232640179579e-26	2.00287	0.372	0.103	1.66572746140256e-22	14	rep HEP	Stk38l
1.97761539980555e-149	2.00267	0.874	0.344	3.1303674163522e-145	3	HEP4	Cyp2c54
1.05729357151851e-36	2.00247	0.261	0.071	1.67358999435665e-32	6	CN-M2	Ly9
7.00549656161983e-35	2.00247	0.258	0.072	1.1089000507388e-30	6	CN-M2	Arhgap27
2.16273856824568e-44	2.00243	0.319	0.089	3.42339887967609e-40	6	CN-M2	Cttnbp2nl
5.55246924778782e-46	2.00211	0.692	0.239	8.78900357232335e-42	14	rep HEP	Fbxw9
8.17961988246883e-31	2.00162	0.277	0.075	1.29475203119599e-26	9	CN	Ptgfrn
1.37116369762924e-54	2.00159	0.419	0.127	2.17041501697732e-50	6	CN-M2	Ppp1r9b
9.60753491905577e-28	2.00078	0.353	0.137	1.52077670233734e-23	8	CN-M1	Cstdc4
4.12697614952317e-22	2.00074	0.308	0.084	6.53259054708023e-18	14	rep HEP	Lrba
5.77576210272457e-36	2.00054	0.545	0.172	9.14245383240271e-32	14	rep HEP	Mtfp1
4.67870158211861e-115	2.00053	0.828	0.313	7.40591673433555e-111	6	CN-M2	Cyth4
2.00578205724805e-73	2.00043	0.589	0.208	3.17495241841794e-69	6	CN-M2	Gltp
4.61460820536336e-90	1.99984	0.733	0.299	7.30446332826966e-86	6	CN-M2	Il4ra
1.67382685778834e-28	1.99975	0.316	0.109	2.64950053319317e-24	8	CN-M1	Il1f9
3.4013623360559e-37	1.99948	0.5	0.136	5.38401644174289e-33	14	rep HEP	Nr1d1
7.85384086086289e-61	1.99917	0.891	0.413	1.24318446986599e-56	14	rep HEP	Acat2
1.6806551837496e-35	1.99914	0.487	0.136	2.66030909035725e-31	14	rep HEP	Necab1
8.97340124533785e-61	1.99851	0.872	0.332	1.42039968312453e-56	14	rep HEP	Lsm2
1.54600900162426e-71	1.99836	0.606	0.225	2.44717764867104e-67	6	CN-M2	Ecscr
2.21975560698717e-22	1.99823	0.34	0.1	3.51365115029999e-18	14	rep HEP	Fcor
2.73849073459519e-91	1.99821	1	0.995	4.33475698379073e-87	14	rep HEP	Ttr
3.80711166276167e-87	1.99811	0.994	0.753	6.02627705098544e-83	13	EC1	Lbp
9.95196838991889e-34	1.99767	0.462	0.129	1.57529707644026e-29	14	rep HEP	Mcm3
1.01970729266723e-92	1.99758	1	0.916	1.61409467356296e-88	14	rep HEP	Urah
2.73089231109636e-68	1.99735	0.974	0.502	4.32272943923443e-64	14	rep HEP	A2ml1
6.5391019317092e-87	1.99722	1	0.842	1.03507444477025e-82	14	rep HEP	Mettl7b
3.57506210092963e-145	1.99682	0.711	0.162	5.65896579956151e-141	6	CN-M2	Ly6i
1.47985322848171e-21	1.99677	0.327	0.096	2.3424596753637e-17	14	rep HEP	Abhd10
3.40204694053752e-36	1.99656	0.265	0.061	5.38510010217684e-32	9	CN	Dusp5
7.58878085371651e-46	1.99545	0.443	0.134	1.20122812133479e-41	9	CN	Rab31
3.69805546160433e-25	1.99515	0.607	0.191	5.85365199017349e-21	15	OG	Ccr5
1.0462307379395e-82	1.99498	0.717	0.303	1.65607863508444e-78	6	CN-M2	Gusb
1.37799699301411e-48	1.9947	0.297	0.072	2.18123144024203e-44	6	CN-M2	Mir142hg
1.96571216219978e-40	1.99466	0.3	0.085	3.11152578154603e-36	6	CN-M2	Rinl
1.33832108956031e-147	1.99423	0.983	0.535	2.11842845266501e-143	6	CN-M2	Fxyd5
2.37917155193135e-55	1.99414	0.492	0.176	3.76599064955213e-51	6	CN-M2	Ccr5
4.34615466507395e-42	1.99413	0.628	0.212	6.87952821934556e-38	13	EC1	Nme6
1.33628681755522e-48	1.99382	0.403	0.129	2.11520840350816e-44	6	CN-M2	Cryab
7.10944409767947e-23	1.99364	0.584	0.192	1.12535390622168e-18	15	OG	Arf6
1.19567044771237e-122	1.99325	0.992	0.78	1.89262675168392e-118	6	CN-M2	H2-Aa
6.37099048602327e-124	1.99292	0.992	0.905	1.00846408403262e-119	6	CN-M2	Igfbp7
6.01074736034521e-39	1.99284	0.831	0.256	9.51441199669044e-35	15	OG	Mgp
2.02514025071186e-53	1.99228	0.568	0.331	3.2055945028518e-49	0	M	Pacs2
3.82936897376091e-40	1.99196	0.609	0.199	6.06150814856615e-36	14	rep HEP	Gdap2
1.04528064309306e-25	1.99151	0.327	0.083	1.654574729952e-21	14	rep HEP	Tex30
2.42295804605462e-40	1.9915	0.955	0.577	3.83530029109986e-36	15	OG	Acss2
5.04351827938385e-60	1.99131	0.458	0.139	7.9833850844367e-56	6	CN-M2	Ltb
2.1208547395536e-14	1.99117	0.256	0.084	3.35710096723939e-10	14	rep HEP	1810034E14Rik
1.08047217516254e-62	1.99104	0.872	0.582	1.71027940606479e-58	8	CN-M1	Gm42418
1.38778076226262e-44	1.99094	1	0.824	2.1967181685855e-40	15	OG	Dcn
1.50966398813286e-33	1.9909	0.456	0.197	2.38964712681551e-29	8	CN-M1	Cdc42ep2
2.65964194766176e-44	1.99058	0.336	0.098	4.2099472389538e-40	6	CN-M2	Lfng
6.21651492550069e-77	1.99056	0.617	0.218	9.84012147557504e-73	6	CN-M2	Nckap1l
6.01340059680669e-53	1.99052	0.436	0.143	9.51861180468531e-49	6	CN-M2	Oxct1
5.08828026919177e-19	1.99047	0.282	0.081	8.05423883810365e-15	14	rep HEP	Tesk2
4.25920370798674e-55	1.99001	1	0.967	6.7418935493722e-51	15	OG	Rpl36
6.01784504414135e-16	1.98931	0.256	0.078	9.52564692037134e-12	14	rep HEP	Fmo4
6.07748049813794e-81	1.98887	0.597	0.192	9.62004388050254e-77	6	CN-M2	Ehbp1l1
1.36393576587933e-63	1.98864	0.949	0.52	2.15897392381039e-59	14	rep HEP	Prodh
1.1323519717053e-36	1.98638	0.265	0.06	1.79239993601232e-32	9	CN	Chst11
4.03822490247949e-38	1.98627	0.583	0.189	6.39210619813479e-34	14	rep HEP	1110059E24Rik
3.09027381919865e-84	1.98615	0.894	0.528	4.89159442840954e-80	9	CN	Hmox1
1.70822349740897e-53	1.98607	0.814	0.318	2.70394697404866e-49	14	rep HEP	Etfbkmt
1.18328022159104e-26	1.98597	0.596	0.174	1.87301426275646e-22	15	OG	Cap1
1.88901855316107e-39	1.98495	0.451	0.112	2.99012746779866e-35	13	EC1	B3galt1
6.97600107387312e-50	1.9846	0.763	0.261	1.10423120998338e-45	14	rep HEP	Adra1b
3.76639703901583e-44	1.98456	0.371	0.097	5.96182987305816e-40	9	CN	Sh2b2
3.89814523230143e-46	1.98422	0.394	0.105	6.17037408820993e-42	9	CN	Sirpb1c
2.10150003926853e-46	1.98419	0.66	0.205	3.32646441215816e-42	14	rep HEP	Mtor
4.14100153373085e-37	1.98408	0.91	0.395	6.55479132774256e-33	15	OG	Ly86
2.96414658616091e-35	1.98322	0.322	0.108	4.6919476312341e-31	6	CN-M2	Emcn
4.76901779068745e-72	1.98297	0.553	0.178	7.54887826087916e-68	6	CN-M2	Gng2
5.78182999960785e-57	1.9828	0.506	0.181	9.15205870637926e-53	6	CN-M2	Abcg1
4.27739358679458e-76	1.98261	0.583	0.193	6.77068630853715e-72	6	CN-M2	Elk3
1.78119862967363e-53	1.98257	0.72	0.23	2.81945931091039e-49	13	EC1	Dnajc12
1.07700752756118e-43	1.98246	0.647	0.211	1.70479521537659e-39	14	rep HEP	Rab4a
1.3960843951347e-46	1.98145	0.439	0.13	2.20986198905872e-42	9	CN	Egln3
8.77973161793716e-20	1.98115	0.404	0.102	1.38974371780327e-15	15	OG	Thy1
5.12656075082376e-87	1.98113	1	0.904	8.11483301247893e-83	14	rep HEP	Uox
4.31815847598782e-33	1.98003	0.474	0.136	6.83521305164113e-29	14	rep HEP	Rassf7
1.38828605386609e-19	1.9799	0.25	0.063	2.19751799466464e-15	14	rep HEP	Aspa
1.79584618284655e-55	1.97959	0.846	0.346	2.84264492282781e-51	14	rep HEP	Gpr146
8.68719325070443e-89	1.97939	0.539	0.164	1.375095819654e-84	3	HEP4	Gm16157
1.79008228067784e-116	1.97866	0.958	0.66	2.83352124208495e-112	6	CN-M2	Ifi30
1.87021563479531e-16	1.97854	0.348	0.09	2.96036432831749e-12	15	OG	Tspan17
6.97635869120301e-126	1.97806	0.917	0.451	1.10428781723052e-121	6	CN-M2	Pirb
1.39407988195579e-79	1.97792	0.886	0.398	2.20668904514783e-75	10	EC2	Cyp2c37
4.65941046194628e-51	1.97792	1	0.87	7.37538082021476e-47	15	OG	Rpl10
4.50885002355352e-25	1.97745	0.353	0.097	7.13705870228287e-21	14	rep HEP	Mmachc
1.30692444062942e-30	1.97739	0.284	0.079	2.06873069707231e-26	9	CN	Adap1
1.64310768969118e-23	1.97679	0.652	0.248	2.60087516201217e-19	15	OG	Lsm5
5.84006640860045e-16	1.97664	0.326	0.082	9.24424111817365e-12	15	OG	Epn2
1.20462780450446e-45	1.97638	0.392	0.127	1.90680535175011e-41	6	CN-M2	Lpxn
5.34449964498726e-80	1.97634	0.994	0.672	8.45980848805033e-76	14	rep HEP	Gjb2
3.11419074853075e-91	1.97571	1	0.919	4.92945253584932e-87	14	rep HEP	Pgrmc1
4.60355579465825e-61	1.97564	0.322	0.079	7.28696846736455e-57	3	HEP4	1810059H22Rik
1.18925586395225e-24	1.97561	0.375	0.169	1.88247310705001e-20	8	CN-M1	Ccl24
2.2675730702118e-34	1.97524	0.258	0.073	3.58934141283827e-30	6	CN-M2	Pmm1
5.93511073326067e-31	1.97353	0.442	0.126	9.39468677967831e-27	14	rep HEP	Mmab
6.60653129988298e-40	1.97347	0.294	0.083	1.04574783945848e-35	6	CN-M2	Lpcat1
2.23704585310575e-88	1.97332	0.986	0.893	3.5410198808811e-84	6	CN-M2	Fabp5
1.34682442128592e-40	1.97297	0.564	0.163	2.13188837645349e-36	14	rep HEP	Tef
3.65551109487881e-21	1.97253	0.596	0.213	5.78630851208367e-17	15	OG	Rdh11
1.39757893456734e-20	1.97204	0.438	0.114	2.21222769552664e-16	15	OG	Hacd4
3.5879941182955e-23	1.97204	0.34	0.097	5.67943588984994e-19	14	rep HEP	Nmnat1
1.3492764811855e-50	1.97127	0.417	0.108	2.13576974206853e-46	9	CN	Cd300lf
1.86440925161276e-25	1.97096	0.307	0.081	2.95117340437784e-21	12	HEP2	Slc1a4
1.51243529762968e-106	1.97076	0.966	0.525	2.39403383261802e-102	9	CN	S100a11
2.34231885417921e-26	1.97035	0.397	0.117	3.70765651428026e-22	14	rep HEP	Abcb10
4.51620249249977e-75	1.96999	0.994	0.718	7.14869692537788e-71	14	rep HEP	C9
8.4345753604923e-49	1.96987	0.744	0.258	1.33510893381233e-44	14	rep HEP	Spryd7
7.66123901940267e-23	1.96934	0.34	0.098	1.21269752438125e-18	14	rep HEP	Srbd1
2.6577886702566e-17	1.969	0.404	0.114	4.20701368614917e-13	15	OG	Sirpb1c
6.6030271302591e-81	1.96881	0.811	0.345	1.04519316444871e-76	9	CN	Hif1a
1.79209104974639e-62	1.96863	0.564	0.212	2.83670092264357e-58	6	CN-M2	Ptp4a3
7.87584639159206e-16	1.96852	0.381	0.217	1.24666772532511e-11	8	CN-M1	Dgat1
4.29591429463378e-56	1.96784	0.466	0.122	6.80000273697581e-52	9	CN	Pstpip1
6.14452518723886e-21	1.96772	0.282	0.075	9.72616891888039e-17	14	rep HEP	Mrnip
4.80764965808027e-89	1.96743	1	1	7.61002864377525e-85	14	rep HEP	Ftl1
3.68724283213742e-49	1.96723	0.356	0.1	5.83653667899032e-45	6	CN-M2	Dok1
1.12028464202814e-78	1.96712	0.614	0.211	1.77329855986634e-74	6	CN-M2	Plekho1
4.47622820327982e-19	1.96665	0.314	0.097	7.08542162297162e-15	14	rep HEP	Gm33543
8.94767530811435e-33	1.96659	0.719	0.213	1.41632752452142e-28	15	OG	Rcn1
6.11446916319552e-90	1.96624	1	0.838	9.67859323842218e-86	14	rep HEP	Agpat2
3.08404354151675e-49	1.96615	0.776	0.293	4.88173252186687e-45	14	rep HEP	Rangap1
4.55927758815761e-29	1.96602	0.254	0.067	7.21688049429469e-25	9	CN	Susd3
7.80372440578855e-55	1.96602	0.311	0.081	1.23525153619227e-50	3	HEP4	Sult2a7
4.63240483584277e-45	1.96468	0.575	0.262	7.33263361465553e-41	8	CN-M1	Gna13
1.24528191847066e-15	1.96466	0.326	0.084	1.97115674874721e-11	15	OG	Pamr1
6.4622755319923e-64	1.96434	0.897	0.367	1.02291359395906e-59	14	rep HEP	Slc41a2
1.68822818833628e-27	1.9637	0.331	0.128	2.6722963993175e-23	8	CN-M1	Basp1
9.14846175728534e-61	1.96347	0.904	0.374	1.4481100115607e-56	14	rep HEP	Coq7
1.54881323379308e-47	1.96308	0.367	0.109	2.45161646777107e-43	6	CN-M2	Cavin1
1.19795576271622e-75	1.96299	0.987	0.7	1.89624417680351e-71	14	rep HEP	Lsr
4.33320265749133e-54	1.96214	0.782	0.276	6.85902648654303e-50	14	rep HEP	Snrpa1
1.1204231385724e-30	1.96199	0.453	0.204	1.77351778604625e-26	8	CN-M1	Oasl2
9.01665874448064e-25	1.96199	0.449	0.103	1.42724691266384e-20	15	OG	Dram1
3.67546915964593e-43	1.96184	0.686	0.24	5.81790013280354e-39	14	rep HEP	Abcb6
9.82557391591984e-74	1.96174	0.994	0.649	1.55529009515095e-69	14	rep HEP	Shmt2
7.43153314883143e-103	1.96161	0.958	0.586	1.17633738212853e-98	9	CN	Lst1
8.38501069904641e-28	1.96158	0.39	0.111	1.32726334355206e-23	13	EC1	Ildr2
1.19921947716381e-16	1.96139	0.36	0.095	1.89824451040259e-12	15	OG	Ikbip
9.47357133554867e-31	1.96126	0.798	0.314	1.499571606704e-26	15	OG	Sptbn1
8.51851595449607e-24	1.96065	0.385	0.119	1.34839589043718e-19	14	rep HEP	Znhit3
1.35823172468549e-23	1.96044	0.494	0.129	2.14994499700466e-19	15	OG	Gas1
1.64756490708347e-26	1.96039	0.273	0.078	2.60793049142243e-22	11	NC-P	Slc7a11
7.32254325908136e-92	1.96038	1	0.909	1.15908537247999e-87	14	rep HEP	Slc25a39
1.03944091313833e-21	1.95977	0.293	0.08	1.64533102140666e-17	13	EC1	Sox9
6.09679415655978e-55	1.95906	0.45	0.147	9.65061547041848e-51	6	CN-M2	Rab3il1
3.26371110257355e-55	1.95903	1	0.984	5.16612830426368e-51	15	OG	Rpl35a
1.10681907076874e-44	1.95863	0.345	0.083	1.75198390711984e-40	9	CN	Apobr
1.77468840716169e-27	1.9586	0.272	0.076	2.80915427969624e-23	10	EC2	Mpo
3.60926152695067e-43	1.95801	0.413	0.121	5.71310007101022e-39	9	CN	Gpr137b
1.54847618743002e-42	1.95798	0.989	0.505	2.45108295708297e-38	15	OG	Serpinh1
3.26238615962494e-87	1.95771	1	0.85	5.16403105207032e-83	14	rep HEP	Arpp19
5.67452719521539e-97	1.95742	0.917	0.496	8.98220909730644e-93	9	CN	Gmfg
2.59023693598693e-84	1.95739	1	0.755	4.10008604597372e-80	14	rep HEP	Pnpla7
1.95639480229952e-44	1.95736	0.679	0.225	3.09677733255991e-40	14	rep HEP	Apoo
1.89164034206371e-16	1.95719	0.427	0.13	2.99427749745265e-12	15	OG	Scarf2
3.2476544572842e-56	1.95709	0.865	0.356	5.14071224043516e-52	14	rep HEP	Paox
4.94796668565926e-47	1.95664	0.411	0.138	7.83213646673004e-43	6	CN-M2	Cygb
8.85589430504101e-17	1.95649	0.36	0.095	1.40179950954494e-12	15	OG	Cdca3
1.58823946683996e-84	1.95645	0.514	0.132	2.51402425206097e-80	6	CN-M2	Parp8
6.3967843021773e-28	1.95641	0.41	0.118	1.01254698719165e-23	14	rep HEP	Asf1a
1.49659975663681e-28	1.95637	0.347	0.133	2.36896775478041e-24	8	CN-M1	Egln3
2.22942352113845e-34	1.9563	0.425	0.166	3.52895449161006e-30	8	CN-M1	Ccr1
1.54791449618705e-26	1.95575	0.3	0.107	2.45019385601448e-22	8	CN-M1	Ralgds
1.39472322144341e-52	1.95567	0.428	0.135	2.20770738722277e-48	6	CN-M2	Nrp2
8.40943607854745e-12	1.95565	0.27	0.074	1.33112963687328e-07	15	OG	Slc30a4
2.04170089783842e-14	1.95543	0.371	0.114	3.23180835118844e-10	15	OG	Tbkbp1
2.03445600340993e-24	1.95526	0.34	0.092	3.22034040779757e-20	14	rep HEP	Stxbp6
4.87500161931032e-21	1.95508	0.282	0.074	7.7166400632063e-17	14	rep HEP	Zfp946
1.7470912291614e-14	1.95508	0.269	0.091	2.76547070663958e-10	14	rep HEP	Nxpe2
1.60484017104365e-120	1.95501	0.994	0.731	2.540301506745e-116	6	CN-M2	H2-Eb1
1.40730784840267e-26	1.95495	0.404	0.12	2.22762759323658e-22	14	rep HEP	Nat2
3.83819906640138e-26	1.95491	0.708	0.268	6.07548530220674e-22	15	OG	Abcg2
1.38063971669032e-100	1.95445	0.789	0.327	2.18541460754911e-96	6	CN-M2	Prkcd
8.48460955211273e-12	1.95427	0.416	0.158	1.34302884600392e-07	15	OG	Cxcl13
3.18190684187275e-30	1.95424	0.82	0.35	5.03664034000038e-26	15	OG	Ppp4c
1.32088882423879e-38	1.954	0.356	0.121	2.09083491988758e-34	6	CN-M2	Pmp22
2.02878923131159e-83	1.95387	0.856	0.406	3.21137047424312e-79	9	CN	Efhd2
1.58293635051369e-95	1.95371	1	0.956	2.50562994922812e-91	14	rep HEP	Aldob
8.84081485193789e-75	1.95368	0.642	0.242	1.39941258291325e-70	6	CN-M2	Rgs10
4.00931000207497e-34	1.95345	0.269	0.08	6.34633680228447e-30	6	CN-M2	Trpv2
5.64826371309802e-91	1.95335	1	0.934	8.94063663146285e-87	14	rep HEP	Uqcr10
1.15399406823507e-47	1.95303	0.406	0.134	1.82665721060929e-43	6	CN-M2	Renbp
6.55999873674473e-16	1.95114	0.303	0.15	1.03838220003932e-11	8	CN-M1	Trp53i11
1.81479707110263e-40	1.95104	0.278	0.073	2.87264228384835e-36	6	CN-M2	Pdgfa
1.0760979326242e-97	1.95071	0.683	0.218	1.70335541755085e-93	6	CN-M2	Emilin2
1.193686430363e-29	1.95003	0.506	0.171	1.8894862506216e-25	14	rep HEP	Fam92a
6.75560445669353e-12	1.94984	0.281	0.08	1.06934462945002e-07	15	OG	Nav1
2.53019935025583e-86	1.94945	1	0.942	4.00505255151995e-82	14	rep HEP	Cyp3a11
1.69718286373975e-28	1.94879	0.423	0.124	2.68647075501364e-24	14	rep HEP	Wdr53
2.75004542193257e-62	1.94873	0.5	0.163	4.35304689837706e-58	6	CN-M2	Itpripl2
2.58476663578631e-102	1.94802	0.831	0.365	4.09142710778615e-98	6	CN-M2	Cotl1
1.72761649129334e-14	1.94735	0.27	0.063	2.73464414406822e-10	15	OG	Itm2a
4.14234203396319e-11	1.94656	0.258	0.073	6.55691320556033e-07	15	OG	Fbxl6
5.45097733087051e-63	1.94568	0.522	0.177	8.62835201703493e-59	6	CN-M2	Vat1
1.44850886111068e-61	1.94562	0.872	0.306	2.2928446762521e-57	14	rep HEP	Exosc7
2.22699364812331e-40	1.9447	0.628	0.207	3.52510824561439e-36	14	rep HEP	Rdh11
3.03526924544323e-64	1.94424	0.955	0.537	4.80452768861209e-60	14	rep HEP	Ss18l2
6.28501967791649e-51	1.94382	0.744	0.248	9.94855764817401e-47	14	rep HEP	Rbpms2
2.22694142362254e-15	1.94374	0.36	0.101	3.52502557945213e-11	15	OG	Ddah2
1.30024843019622e-56	1.94353	0.378	0.099	2.0581632401576e-52	6	CN-M2	Ralgds
2.35997934201961e-27	1.94342	0.442	0.141	3.73561130048284e-23	14	rep HEP	Gm16548
7.605891350242e-32	1.94288	0.264	0.08	1.20393654182981e-27	6	CN-M2	Thbd
8.54928373474964e-12	1.94268	0.315	0.097	1.35326612237352e-07	15	OG	Tcp11l1
2.94674953034071e-46	1.94209	1	0.755	4.6644098315763e-42	15	OG	Rpl22l1
8.30844668763771e-89	1.94185	1	0.896	1.31514402618617e-84	14	rep HEP	Stard10
8.71852565986587e-62	1.94176	0.897	0.381	1.38005542670017e-57	14	rep HEP	Slc2a2
5.04399398339308e-50	1.94164	0.611	0.295	7.98413807631291e-46	6	CN-M2	Lpl
4.38388791074655e-92	1.94126	1	0.897	6.93925617392071e-88	14	rep HEP	Pcbd1
1.65557815432128e-31	1.94084	0.494	0.157	2.62061466047516e-27	14	rep HEP	Spon2
4.66324525242018e-83	1.94047	1	0.793	7.3814509100559e-79	14	rep HEP	Gchfr
1.08487474603336e-81	1.94043	1	0.995	1.71724823549621e-77	14	rep HEP	Hamp
1.81447591836208e-76	1.94038	0.631	0.233	2.87213393117534e-72	6	CN-M2	Anxa3
8.64248179490537e-51	1.94012	1	0.96	1.36801844331557e-46	15	OG	Rps23
1.22428602139657e-42	1.93998	0.641	0.208	1.93792234326863e-38	14	rep HEP	Aarsd1
4.61892940122036e-20	1.93998	0.288	0.08	7.31130334919171e-16	14	rep HEP	Tbx3
1.09966262339845e-10	1.93986	0.303	0.099	1.74065596657741e-06	15	OG	Tmem88
9.83931256493713e-52	1.93966	0.769	0.269	1.5574647859039e-47	14	rep HEP	Cyp2j6
8.53600529978074e-32	1.93958	1	0.857	1.35116427890229e-27	15	OG	Mup20
1.33539453969632e-38	1.93949	0.3	0.088	2.11379601688531e-34	6	CN-M2	Akna
9.32202804990248e-79	1.93938	0.994	0.728	1.47558382001906e-74	14	rep HEP	Aldh7a1
3.25224649344713e-37	1.93938	0.966	0.573	5.14798097447747e-33	15	OG	Cyp2d9
8.51432140528966e-91	1.93923	1	0.983	1.3477319352433e-86	14	rep HEP	Cyb5a
1.56155239410593e-35	1.93897	0.775	0.228	2.47178128463027e-31	15	OG	Cd93
1.48677227342604e-27	1.9385	0.429	0.132	2.35341183160608e-23	14	rep HEP	Ppp1r14a
7.28746908090304e-65	1.93837	0.472	0.137	1.15353348081614e-60	6	CN-M2	Rasa4
2.84304948710934e-71	1.93832	0.951	0.457	4.50026303314537e-67	13	EC1	Tifa
1.26558229958686e-86	1.93807	0.722	0.297	2.00329022201605e-82	6	CN-M2	Cmtm3
1.79126944233062e-40	1.93753	0.609	0.192	2.83540040026514e-36	14	rep HEP	Hsd17b7
1.16217242886264e-23	1.93655	0.301	0.076	1.83960273764668e-19	14	rep HEP	Ezh2
4.63310543986574e-53	1.93625	0.782	0.282	7.33374260076348e-49	14	rep HEP	Galm
3.29361490889548e-37	1.93622	0.966	0.517	5.21346303929066e-33	15	OG	Fcgr4
8.39935044443922e-39	1.93617	0.577	0.178	1.32953318185028e-34	14	rep HEP	Aox1
1.37396193506943e-66	1.93601	0.962	0.551	2.1748443470214e-62	14	rep HEP	Gpd1
3.93379053079259e-84	1.93547	0.472	0.108	6.22679703119159e-80	6	CN-M2	F13a1
9.49490334887722e-23	1.93544	0.346	0.101	1.50294825109378e-18	14	rep HEP	Marveld2
5.45141005795539e-12	1.93516	0.258	0.068	8.62903698073759e-08	15	OG	Plat
4.33466756534211e-72	1.9349	0.739	0.253	6.86134528918003e-68	11	NC-P	Acod1
9.73928657362194e-91	1.93465	0.663	0.175	1.54163167173862e-86	9	CN	Smox
3.25255301296295e-40	1.9346	1	0.913	5.14846616421905e-36	15	OG	Orm2
1.68012021267646e-35	1.93456	0.449	0.115	2.65946228464557e-31	14	rep HEP	Top2a
4.41428020716108e-15	1.93453	0.36	0.102	6.98736413991528e-11	15	OG	Fcor
1.41975885194992e-17	1.93433	0.382	0.101	2.24733628675153e-13	15	OG	Cd34
8.44799777706369e-122	1.93337	0.735	0.257	1.33723356813141e-117	3	HEP4	Mup10
8.50766558869264e-81	1.93296	1	0.768	1.34667838603416e-76	14	rep HEP	Acsl5
3.26184307603351e-46	1.93184	0.375	0.117	5.16317140505345e-42	6	CN-M2	Arhgap30
2.88686539692623e-40	1.93169	0.447	0.15	4.56961923679452e-36	9	CN	Aldh3b1
1.85571524681899e-17	1.93088	0.308	0.099	2.93741166418979e-13	14	rep HEP	Dnase2b
8.47812473445629e-21	1.93085	0.323	0.099	1.34200236421709e-16	13	EC1	Lysmd3
1.23009656860722e-21	1.93064	0.333	0.098	1.94711985844837e-17	14	rep HEP	Pex12
7.13595162753114e-88	1.93062	0.78	0.237	1.1295497831219e-83	10	EC2	Lars2
9.91394051968411e-31	1.92992	0.421	0.118	1.5692776448608e-26	13	EC1	Gfpt1
1.18805454029671e-29	1.92948	0.425	0.189	1.88057153183566e-25	8	CN-M1	Tgif1
4.60267521484795e-69	1.92942	0.968	0.583	7.28557459758282e-65	14	rep HEP	Fuom
3.89363263175977e-23	1.92925	0.353	0.103	6.16323109281255e-19	14	rep HEP	Nudcd1
1.17651667598063e-11	1.92924	0.292	0.087	1.86230824640974e-07	15	OG	Pcnx4
5.2950068064758e-28	1.92847	0.462	0.151	8.38146627397054e-24	14	rep HEP	Rfc1
4.15696042989308e-91	1.92773	1	0.954	6.58005266447776e-87	13	EC1	Cp
5.87673807297468e-77	1.92759	0.636	0.235	9.30228869571163e-73	6	CN-M2	Necap2
2.61560936085303e-16	1.92744	0.416	0.126	4.14024805729425e-12	15	OG	Pdgfra
5.18242384967492e-34	1.92723	0.532	0.167	8.20325871165043e-30	14	rep HEP	Coq3
5.33198767381554e-42	1.92707	0.966	0.485	8.44000328888262e-38	15	OG	Rps27rt
2.04593628796483e-42	1.92679	0.333	0.1	3.23851255021953e-38	6	CN-M2	Man1c1
7.81837976725895e-35	1.92669	0.295	0.076	1.23757133335942e-30	9	CN	Mir142hg
1.83355094813616e-29	1.92587	0.277	0.077	2.90232779580473e-25	9	CN	Lat
5.34906380978248e-85	1.92551	0.725	0.295	8.46703310450469e-81	6	CN-M2	Emilin1
4.81825933854656e-39	1.92545	0.641	0.224	7.62682270698534e-35	14	rep HEP	Eif2b4
5.03067201089397e-18	1.92514	0.427	0.121	7.96305072604407e-14	15	OG	Slc1a5
5.82442048129462e-32	1.92474	0.545	0.189	9.21947517984125e-28	14	rep HEP	Nr1d2
8.86917020095275e-37	1.92467	0.494	0.134	1.40390095110881e-32	14	rep HEP	Dnajc9
2.88595541061777e-91	1.92466	1	0.998	4.56817881946686e-87	14	rep HEP	Wfdc21
1.52477195550968e-36	1.92409	0.35	0.113	2.41356152837627e-32	8	CN-M1	Cytip
3.22365421593869e-57	1.92385	0.91	0.404	5.10272225840935e-53	14	rep HEP	Perp
1.35336598543522e-34	1.92384	0.455	0.12	2.14224301834541e-30	14	rep HEP	Mcm2
5.15308651309259e-69	1.92384	0.945	0.517	8.15682064157426e-65	13	EC1	Dnajb11
2.40369392068275e-31	1.92383	0.831	0.329	3.80480710704872e-27	15	OG	Nsdhl
1.30725960448657e-41	1.92381	0.679	0.252	2.06926122794179e-37	14	rep HEP	Mrpl49
9.73897661656001e-20	1.92332	0.562	0.204	1.54158260863528e-15	15	OG	Tmem243
2.09948738529794e-44	1.92331	0.731	0.272	3.32327858218811e-40	14	rep HEP	Gstt2
3.27924198992534e-96	1.9233	0.858	0.492	5.19071214585282e-92	6	CN-M2	Tpm1
4.64838412871233e-23	1.9229	0.34	0.096	7.35792723733875e-19	14	rep HEP	Cwf19l1
1.18452059787456e-47	1.92258	0.795	0.321	1.87497765437564e-43	14	rep HEP	Pafah2
1.47406808193949e-67	1.92235	0.575	0.208	2.33330236690201e-63	6	CN-M2	Esyt1
1.37139918814484e-34	1.92206	0.292	0.09	2.17078777491446e-30	6	CN-M2	Milr1
4.6422653258626e-29	1.92202	0.618	0.166	7.34824178430792e-25	15	OG	Dpysl2
1.18435601429952e-84	1.922	1	0.795	1.87471713503471e-80	14	rep HEP	Pygl
6.99055387664174e-14	1.9216	0.326	0.092	1.10653477313362e-09	15	OG	Hscb
5.80354380689866e-32	1.92156	0.538	0.181	9.18642949193989e-28	14	rep HEP	Miga2
5.86011308375775e-56	1.9214	0.383	0.103	9.27597300028014e-52	6	CN-M2	Smtn
4.56353094138147e-25	1.92129	0.64	0.212	7.22361312711273e-21	15	OG	Cd300a
3.98277017686503e-39	1.92104	0.353	0.117	6.30432691295965e-35	6	CN-M2	Itgb7
1.4393771570757e-44	1.92084	0.75	0.304	2.27839010193512e-40	14	rep HEP	1700123O20Rik
5.99915671580651e-12	1.92063	0.292	0.085	9.49606516545013e-08	15	OG	Galc
8.99280316763287e-90	1.91991	0.731	0.225	1.42347081340461e-85	9	CN	Plek
2.38066739040329e-57	1.91955	0.464	0.148	3.76835841226937e-53	6	CN-M2	Tm6sf1
2.58954134945465e-29	1.91943	0.742	0.253	4.09898500205177e-25	15	OG	Tmem86a
2.51822893222928e-64	1.91935	0.533	0.183	3.98610457682573e-60	6	CN-M2	Inpp5d
5.48928023298478e-43	1.91933	1	0.815	8.68898168079161e-39	15	OG	Ifi27l2a
1.71985542851477e-26	1.91909	0.25	0.071	2.72235915779604e-22	9	CN	Rab11fip1
1.2376334939557e-102	1.91904	0.792	0.312	1.95905005758248e-98	6	CN-M2	Gsn
8.6471610361389e-92	1.91903	1	0.936	1.36875912041043e-87	14	rep HEP	Ddt
1.05979663769169e-86	1.91902	0.872	0.605	1.67755209780217e-82	6	CN-M2	Bmp1
1.6014596085568e-49	1.919	0.409	0.105	2.53495041438456e-45	9	CN	Cd33
1.3899096418569e-135	1.91882	1	0.925	2.20008797209529e-131	6	CN-M2	Ctsd
2.73807472133424e-123	1.91836	0.856	0.244	4.33409847639997e-119	9	CN	Acod1
1.91158054470439e-34	1.9182	0.447	0.17	3.02584084421259e-30	9	CN	F630028O10Rik
1.04887888529742e-77	1.91785	0.667	0.259	1.66027038753729e-73	6	CN-M2	Sbno2
9.29686775254631e-35	1.91726	0.5	0.144	1.47160119655056e-30	14	rep HEP	Fabp7
8.11492978036091e-43	1.91713	0.679	0.238	1.28451223493333e-38	14	rep HEP	Mapre3
1.16483068047665e-21	1.91698	0.584	0.197	1.84381048412649e-17	15	OG	Abcg1
4.61553483834517e-35	1.91691	0.253	0.069	7.30593009561658e-31	6	CN-M2	Igfbp6
3.83771495017688e-19	1.91673	0.528	0.177	6.07471899463498e-15	15	OG	Cpne1
2.61990646613264e-23	1.91643	0.258	0.082	4.14704994524136e-19	9	CN	Ltb4r1
1.31815493910486e-39	1.91607	0.628	0.212	2.08650745310909e-35	14	rep HEP	Ppil1
4.47103366636451e-30	1.91602	0.384	0.1	7.07719919048839e-26	13	EC1	Gm7694
5.70009196059927e-143	1.916	0.887	0.415	9.02267556443258e-139	3	HEP4	Fabp2
8.21733037074673e-27	1.91561	0.517	0.126	1.3007212243855e-22	15	OG	Myl9
1.813712725335e-66	1.91553	0.456	0.123	2.87092587293278e-62	7	HEP5	Gdf10
2.87036813113312e-13	1.91551	0.348	0.107	4.54350571477061e-09	15	OG	Tspan15
1.46920515352123e-79	1.91549	1	0.896	2.32560483750876e-75	13	EC1	Saa2
2.17298058690387e-94	1.91462	1	0.959	3.43961097101013e-90	14	rep HEP	Cat
1.22520660784296e-79	1.91462	0.994	0.704	1.93937953955462e-75	14	rep HEP	Slc25a1
1.23294627648496e-22	1.91456	0.359	0.108	1.95163066104804e-18	14	rep HEP	Gm45338
2.33380170691265e-81	1.91386	0.994	0.769	3.69417472187204e-77	14	rep HEP	Glyat
3.08121649377468e-19	1.9132	0.314	0.097	4.87725758799594e-15	14	rep HEP	Mnd1
5.15683495197058e-16	1.91313	0.393	0.116	8.16275404547423e-12	15	OG	Ano10
6.7839307709822e-52	1.91258	1	0.967	1.07382840173877e-47	15	OG	Rpl19
3.28873891266772e-12	1.91258	0.292	0.083	5.20574482486173e-08	15	OG	Pmm1
2.52208698434879e-31	1.91166	0.264	0.082	3.99221148752571e-27	6	CN-M2	Plekha1
5.59246454339093e-17	1.91155	0.308	0.103	8.85231212573351e-13	14	rep HEP	Dhrs11
1.77235011987797e-35	1.91135	0.564	0.186	2.80545300475484e-31	14	rep HEP	Gm16157
1.7226536167528e-85	1.91062	0.642	0.213	2.72678840995801e-81	6	CN-M2	Plekho2
6.73596914113638e-15	1.91055	0.36	0.103	1.06623655535048e-10	15	OG	Fkbp7
1.05931520797527e-56	1.91049	1	0.875	1.67679004270405e-52	14	rep HEP	Rgn
1.47047941660777e-64	1.91048	0.594	0.233	2.32762186854845e-60	6	CN-M2	Evl
1.79489786853766e-63	1.91035	0.686	0.259	2.84114383610826e-59	9	CN	Igsf6
4.23658579016123e-25	1.90987	0.475	0.252	6.70609164724621e-21	8	CN-M1	Ifrd1
2.40762968151637e-28	1.90984	0.455	0.142	3.81103702287225e-24	14	rep HEP	Mcm10
8.92753985023448e-30	1.90968	0.272	0.09	1.41314028289362e-25	6	CN-M2	Lix1l
3.57349345420986e-59	1.90946	0.942	0.598	5.65648278866879e-55	14	rep HEP	Vsig4
6.07581995225683e-57	1.90924	0.872	0.342	9.61741540242734e-53	14	rep HEP	Mid1ip1
2.88352443610595e-38	1.9086	0.297	0.086	4.56433082991212e-34	6	CN-M2	Mfap4
3.5140425518425e-73	1.90849	0.987	0.604	5.5623779553115e-69	14	rep HEP	Gclc
3.81810074180406e-41	1.90835	0.628	0.204	6.04367166420165e-37	14	rep HEP	Sptbn2
1.95066917939886e-16	1.90785	0.528	0.206	3.08771424407045e-12	15	OG	Aacs
8.54445536557482e-16	1.90752	0.427	0.136	1.35250183981684e-11	15	OG	Kdm1a
1.06526185652239e-38	1.90751	0.635	0.219	1.68620299268929e-34	14	rep HEP	1700021F05Rik
2.19178798605989e-39	1.90724	0.267	0.069	3.46938120313421e-35	6	CN-M2	Gpr35
2.90800812912851e-46	1.90705	0.718	0.244	4.60308606759751e-42	14	rep HEP	Timd4
6.91517498054852e-40	1.90679	0.82	0.253	1.09460304767103e-35	15	OG	Postn
6.04860356813391e-87	1.90677	1	0.913	9.57433458799916e-83	13	EC1	Fgl1
9.25334111686681e-12	1.90667	0.326	0.105	1.46471136538885e-07	15	OG	4931406P16Rik
5.3901766542558e-47	1.9066	0.705	0.232	8.53211062602151e-43	14	rep HEP	Cars
6.31365438907879e-87	1.90597	1	0.987	9.99388353247282e-83	14	rep HEP	Ambp
2.40709116003684e-26	1.90554	0.309	0.115	3.81018459722231e-22	8	CN-M1	Hk1
1.64934831996104e-45	1.90545	0.526	0.126	2.61075345566633e-41	14	rep HEP	Mup12
1.17069270554664e-21	1.90545	0.314	0.088	1.85308948360978e-17	14	rep HEP	Slc35e3
7.02212342898489e-35	1.90488	0.921	0.468	1.11153191757402e-30	15	OG	Cd300c2
7.67903180726441e-24	1.90446	0.353	0.1	1.21551394477188e-19	14	rep HEP	2610528J11Rik
6.37691573528561e-21	1.90442	0.584	0.199	1.00940199173836e-16	15	OG	Bcl10
4.94987978448257e-34	1.90439	0.545	0.176	7.83516471085746e-30	14	rep HEP	2900026A02Rik
3.31616558575681e-35	1.90429	0.572	0.31	5.24915850569445e-31	8	CN-M1	Bhlhe40
1.92883231480771e-98	1.90398	0.556	0.133	3.05314867110912e-94	6	CN-M2	Il1r2
3.83704724734819e-64	1.90376	0.942	0.466	6.07366208782745e-60	14	rep HEP	Adhfe1
1.02915780475062e-16	1.90315	0.348	0.089	1.62905388913975e-12	15	OG	Ednra
9.65793570337011e-112	1.90268	1	0.672	1.52875464248646e-107	9	CN	Cyba
2.51583486192704e-28	1.90246	0.787	0.321	3.98231500294431e-24	15	OG	Rtcb
2.34115042801379e-35	1.90216	0.558	0.179	3.70580701250303e-31	14	rep HEP	Nudt18
1.53958673798861e-72	1.90211	0.994	0.482	2.43701184756218e-68	14	rep HEP	C6
6.50449096023606e-51	1.90176	0.808	0.306	1.02959587409577e-46	14	rep HEP	Hmgcr
2.53015469130921e-31	1.90165	0.5	0.158	4.00498186087335e-27	14	rep HEP	Traf4
2.48108614448839e-16	1.9015	0.472	0.16	3.92731125811067e-12	15	OG	Trp53
2.25059749431566e-80	1.90136	0.474	0.134	3.56247077375226e-76	3	HEP4	Acot4
2.5634951533974e-19	1.90132	0.393	0.098	4.05775647831275e-15	15	OG	Lix1l
2.53386556522826e-42	1.90131	0.647	0.212	4.01085580319982e-38	14	rep HEP	Tubg1
1.18944668294163e-72	1.90111	0.974	0.584	1.88277515442831e-68	14	rep HEP	Ethe1
2.62875684114238e-18	1.90107	0.288	0.086	4.16105920384428e-14	14	rep HEP	Tdrp
2.69235335739e-18	1.90093	0.263	0.073	4.26172612941263e-14	14	rep HEP	Ank3
7.97704872382841e-34	1.90083	0.506	0.152	1.2626870424948e-29	14	rep HEP	Copg2
7.29354241995183e-27	1.90082	0.25	0.069	1.15449482965417e-22	9	CN	Nfkbid
3.92284525828365e-48	1.9006	0.504	0.165	6.20947175933718e-44	9	CN	Evi2a
1.01743743532942e-77	1.90041	1	0.912	1.61050171638295e-73	13	EC1	Orm2
4.02330892909551e-85	1.89994	1	0.855	6.36849570386528e-81	14	rep HEP	Comt
1.1001579956947e-37	1.89955	0.622	0.21	1.74144009138515e-33	14	rep HEP	Rab17
9.34762967760642e-77	1.89919	0.784	0.313	1.47963630166832e-72	9	CN	Hcls1
1.12451920787156e-59	1.89917	0.515	0.143	1.78000145413989e-55	9	CN	Il1r2
3.63501867917754e-81	1.89895	0.994	0.779	5.75387106727012e-77	14	rep HEP	Selenbp1
4.13398365619215e-15	1.89844	0.371	0.108	6.54368272938655e-11	15	OG	Ndufa4l2
1.85839073689231e-10	1.8983	0.258	0.076	2.94164669742684e-06	15	OG	Ccdc122
1.31887524836944e-40	1.89807	0.278	0.073	2.08764763064399e-36	6	CN-M2	Clstn1
3.56509513434987e-40	1.89792	0.654	0.228	5.64318908816241e-36	14	rep HEP	Enpp3
1.74303471063484e-57	1.89716	0.899	0.539	2.7590496434639e-53	11	NC-P	Slpi
1.23729544069934e-95	1.89713	0.924	0.434	1.95851495308299e-91	9	CN	Lilrb4a
7.66917962929659e-55	1.89707	0.453	0.145	1.21395444352136e-50	6	CN-M2	P4ha1
6.75522855593984e-35	1.89693	0.571	0.192	1.06928512811972e-30	14	rep HEP	Whamm
4.45864925066041e-47	1.8969	0.259	0.065	7.05759589887037e-43	3	HEP4	Fmo2
3.79791122313064e-90	1.89644	1	0.939	6.01171367509349e-86	14	rep HEP	Gnmt
1.90321959207816e-37	1.89585	0.538	0.158	3.01260629230053e-33	14	rep HEP	Ppfibp2
3.85339398607623e-54	1.8958	0.897	0.473	6.09953734056007e-50	14	rep HEP	Gcat
1.31454061584535e-17	1.89572	0.449	0.137	2.08078634082161e-13	15	OG	Spns2
1.15023059446359e-22	1.89539	0.506	0.139	1.82070000797642e-18	15	OG	Casp4
4.4521618568144e-69	1.89498	0.669	0.275	7.04732700315151e-65	6	CN-M2	H2-DMb1
3.05057268075027e-48	1.89489	0.808	0.341	4.82875149635959e-44	14	rep HEP	Tmem135
4.40859724942763e-32	1.89489	0.564	0.2	6.978368586119e-28	14	rep HEP	Pole3
7.06467899254606e-17	1.89395	0.416	0.123	1.11826803773012e-12	15	OG	Eif2s3y
2.8711420892801e-20	1.89382	0.301	0.086	4.54473081312146e-16	14	rep HEP	Camsap3
2.13127669273656e-25	1.89349	0.73	0.273	3.3735978769327e-21	15	OG	Nfic
2.84459784802648e-19	1.89342	0.427	0.115	4.50271393364112e-15	15	OG	Cul5
3.04274672954083e-63	1.89325	0.644	0.221	4.81636379819018e-59	9	CN	Plekho2
1.48597647878252e-19	1.8931	0.551	0.188	2.35215216826486e-15	15	OG	Adgrl4
2.01718737686038e-56	1.89268	0.483	0.163	3.1930058988323e-52	6	CN-M2	Tnfaip8l2
6.58306085220417e-22	1.89237	0.346	0.104	1.0420327022954e-17	14	rep HEP	Setd6
2.37206991482029e-59	1.89221	0.923	0.535	3.75474946816904e-55	14	rep HEP	Bet1
2.04916689314306e-23	1.89176	0.618	0.202	3.24362627515614e-19	15	OG	Sppl3
1.40614111372501e-79	1.89172	1	0.718	2.22578076891531e-75	14	rep HEP	Egfr
3.04647122740263e-33	1.89143	0.487	0.142	4.82225930585563e-29	14	rep HEP	Reps2
5.48095111800742e-44	1.89107	0.692	0.237	8.67579752469394e-40	14	rep HEP	Tmem53
8.14981279471136e-41	1.891	0.303	0.085	1.29003386727486e-36	6	CN-M2	Gla
5.1600897831905e-25	1.89074	0.388	0.177	8.16790611781225e-21	8	CN-M1	Timp3
3.02415166110583e-108	1.8903	0.977	0.574	4.78692966436442e-104	9	CN	Lcp1
2.42944382973004e-26	1.89027	0.385	0.109	3.84556663807968e-22	14	rep HEP	Nup133
1.00804602147671e-26	1.89014	0.468	0.158	1.59563604739548e-22	14	rep HEP	Pyroxd2
4.23048783136672e-24	1.89012	0.404	0.086	6.69643918827038e-20	15	OG	Adam12
2.50519284611632e-16	1.88969	0.427	0.131	3.96546975611752e-12	15	OG	Icmt
1.23643211562788e-49	1.88935	0.846	0.372	1.95714839582738e-45	14	rep HEP	Cks2
3.12156659393894e-68	1.88932	0.603	0.227	4.94112776154595e-64	6	CN-M2	Fermt3
8.40511168200696e-79	1.88925	0.994	0.703	1.33044512814488e-74	14	rep HEP	Tubb2a
1.42751613606767e-40	1.88874	0.679	0.255	2.25961529178152e-36	14	rep HEP	Ireb2
2.67474024892968e-26	1.88846	0.474	0.165	4.23384634003078e-22	14	rep HEP	Abca6
6.97919823290735e-38	1.88843	0.52	0.159	1.1047372882869e-33	12	HEP2	Rdh16
7.94959178978747e-34	1.88823	0.564	0.191	1.25834088440546e-29	14	rep HEP	Cse1l
5.78579451967003e-41	1.88814	0.667	0.232	9.1583341451857e-37	14	rep HEP	Aasdhppt
6.36847658470142e-33	1.88803	0.295	0.079	1.00806615859239e-28	9	CN	Trac
5.790139418948e-38	1.88785	0.402	0.127	9.16521168625278e-34	9	CN	Ptgr1
3.28205075480135e-86	1.88728	0.817	0.45	5.19515813977505e-82	6	CN-M2	Cd300c2
2.35375019244864e-80	1.88721	0.686	0.268	3.72575117962696e-76	6	CN-M2	Arhgap45
9.8541839491593e-22	1.88666	0.359	0.11	1.55981877731243e-17	14	rep HEP	Mief2
7.68741090752426e-54	1.88664	1	0.983	1.21684027255201e-49	15	OG	Rps16
1.75735970085087e-21	1.88652	0.469	0.251	2.78172467047684e-17	8	CN-M1	Lilr4b
1.59076574517914e-28	1.8863	0.474	0.155	2.51802309804406e-24	14	rep HEP	Ropn1l
1.75627646580953e-36	1.88615	0.545	0.165	2.7800100177299e-32	14	rep HEP	Ptcd3
1.06617934123226e-13	1.88585	0.371	0.116	1.68765527923654e-09	15	OG	Bex3
1.08505808030598e-13	1.88582	0.404	0.138	1.71753843531633e-09	15	OG	Cyp20a1
7.67734343315073e-79	1.88559	1	0.778	1.21524669203343e-74	14	rep HEP	Slc25a47
3.00505085214796e-39	1.88551	0.551	0.156	4.75669499386501e-35	14	rep HEP	Hat1
2.58747497360109e-88	1.88522	1	0.811	4.09571413571317e-84	14	rep HEP	Ndufa5
2.52259646844001e-38	1.88498	0.282	0.077	3.9930179498937e-34	7	HEP5	Cd207
4.77716865557315e-22	1.88461	0.719	0.302	7.56178026490674e-18	15	OG	Kdr
2.30999516909046e-67	1.8845	0.415	0.119	3.65649135315329e-63	3	HEP4	Hectd2os
2.03753294325876e-74	1.8843	0.558	0.174	3.2252108958843e-70	6	CN-M2	Abr
3.41591849344604e-27	1.88426	0.41	0.12	5.40705738327574e-23	14	rep HEP	5033406O09Rik
2.1823030717278e-64	1.8841	0.503	0.16	3.45436753223793e-60	6	CN-M2	Soat1
7.95518539354876e-28	1.88392	0.519	0.188	1.25922629594483e-23	14	rep HEP	Acsf2
5.49351815697214e-40	1.88365	0.667	0.24	8.69568989067121e-36	14	rep HEP	Plxnb1
6.01065442568315e-80	1.88347	1	0.71	9.51426489041385e-76	14	rep HEP	Aldh4a1
3.45218229692119e-67	1.88312	0.659	0.218	5.46445935779656e-63	9	CN	Pfkfb3
7.56292176449149e-68	1.88307	0.974	0.606	1.19713488610136e-63	14	rep HEP	Carhsp1
9.13266014828927e-52	1.88299	1	0.952	1.44560877487271e-47	15	OG	Rpl15
9.00136673269609e-61	1.88293	0.444	0.127	1.42482634011846e-56	6	CN-M2	Rab31
3.31693120514188e-31	1.88288	0.474	0.142	5.25037040461908e-27	14	rep HEP	Siae
1.06604265051266e-121	1.88248	0.824	0.391	1.6874389114965e-117	3	HEP4	Paxx
1.74088812528061e-30	1.88245	0.764	0.267	2.75565181350668e-26	15	OG	Tgfbr2
5.99818306960913e-36	1.88241	0.571	0.183	9.4945239808843e-32	14	rep HEP	Ggcx
2.65500069944734e-45	1.88228	0.564	0.225	4.20260060715519e-41	9	CN	Slc31a2
1.28455341580654e-42	1.88209	0.667	0.225	2.03331960188018e-38	14	rep HEP	Gramd3
5.51155784629316e-17	1.88196	0.256	0.074	8.72424491489744e-13	14	rep HEP	Ccdc122
2.21918297197906e-11	1.88184	0.281	0.082	3.51274472634565e-07	15	OG	Atic
8.398685507047e-33	1.88166	0.267	0.079	1.32942792891047e-28	6	CN-M2	Olfm1
3.54559892084998e-72	1.88149	0.981	0.654	5.61232853181344e-68	14	rep HEP	Msra
4.67208615156964e-36	1.88124	0.325	0.106	7.39544516931958e-32	6	CN-M2	Vasn
1.13268920169941e-38	1.88085	0.667	0.245	1.79293373737e-34	14	rep HEP	Cxxc5
2.27940277923954e-33	1.88081	0.307	0.084	3.60806665925827e-29	9	CN	Trbc1
2.70393473470173e-139	1.88042	0.754	0.151	4.28005829155937e-135	9	CN	AA467197
5.1233861745249e-61	1.88031	0.542	0.195	8.10980797565546e-57	6	CN-M2	Slc43a2
1.32122370782107e-17	1.88029	0.393	0.106	2.09136500710998e-13	15	OG	Efnb1
1.31346033236128e-57	1.88016	0.419	0.118	2.07907636009467e-53	6	CN-M2	Snx20
8.41107297462922e-64	1.88	0.697	0.337	1.33138874115406e-59	6	CN-M2	Ccdc80
3.17822079086827e-18	1.87977	0.382	0.098	5.03080568986538e-14	15	OG	Loxl3
1.41582556073941e-09	1.87976	0.423	0.283	2.24111028009441e-05	0	M	Ngp
3.74707614874712e-29	1.87946	0.854	0.398	5.93124683585182e-25	15	OG	Lpcat3
1.25792833533296e-31	1.87944	0.538	0.182	1.99117476199854e-27	14	rep HEP	Rpa3
5.91056356977715e-56	1.87928	0.483	0.164	9.35583107460025e-52	6	CN-M2	Metrnl
1.22984271459796e-155	1.87803	1	0.944	1.94671803293712e-151	2	HEP0	Mup3
2.73058165759052e-16	1.8772	0.461	0.153	4.32223770580004e-12	15	OG	Dse
3.56866303809241e-15	1.8772	0.449	0.153	5.64883672299648e-11	15	OG	Pklr
6.5410659583991e-53	1.87712	1	0.98	1.03538533055499e-48	15	OG	Rpl34
1.4997893226617e-48	1.87708	0.45	0.159	2.37401651884121e-44	6	CN-M2	Maged2
4.86742832341612e-29	1.8769	0.292	0.086	7.70465229313538e-25	9	CN	Fam102b
8.86465273010252e-51	1.87666	1	0.937	1.40318588064793e-46	15	OG	Rpl36a
5.17689407166017e-46	1.87661	0.724	0.254	8.19450562603088e-42	14	rep HEP	Akip1
2.09848878961425e-30	1.87651	0.468	0.139	3.32169790508039e-26	14	rep HEP	Mrpl47
3.75654860411723e-85	1.87628	1	0.975	5.94624078545716e-81	14	rep HEP	Rnase4
9.96926552522147e-35	1.8757	0.306	0.098	1.57803503998731e-30	6	CN-M2	Gja1
3.46261461641484e-39	1.87561	0.686	0.265	5.48097267632305e-35	14	rep HEP	Gfm1
1.90711173305866e-63	1.87522	0.553	0.157	3.01876716225855e-59	9	CN	Slfn1
6.37521096587183e-59	1.8752	0.519	0.184	1.00913214378785e-54	6	CN-M2	Cd48
3.08160878048819e-11	1.875	0.27	0.077	4.87787853863475e-07	15	OG	Prune1
6.58839480757399e-79	1.87481	1	0.75	1.04287701409089e-74	14	rep HEP	Ftl1-ps1
2.78409960024158e-45	1.87475	0.333	0.093	4.4069512572224e-41	6	CN-M2	Mob3a
1.50479552664724e-113	1.87467	1	0.93	2.38194083912992e-109	6	CN-M2	Cd74
6.66238995475485e-46	1.87462	1	0.937	1.05458970593814e-41	15	OG	Txn1
3.39809246208813e-28	1.87431	0.449	0.137	5.37884055823931e-24	14	rep HEP	Nemp1
2.56928267003746e-194	1.8743	0.998	0.559	4.06691753840229e-190	3	HEP4	Cyp2c68
8.17881606533053e-37	1.87421	0.966	0.516	1.29462479498117e-32	15	OG	Itm2c
2.0877361650351e-69	1.874	0.533	0.169	3.30467757563406e-65	6	CN-M2	Ccdc88b
5.85495720349636e-23	1.8739	0.573	0.175	9.26781175741439e-19	15	OG	Evi2a
1.50903891038304e-43	1.8736	0.5	0.177	2.38865769124531e-39	9	CN	Ccdc88b
2.8171886678084e-70	1.87351	0.597	0.216	4.45932794227392e-66	6	CN-M2	Pycard
3.17257462305397e-22	1.87342	0.321	0.089	5.02186837083214e-18	14	rep HEP	Fam241a
1.42045564166076e-18	1.87338	0.321	0.101	2.24843923518481e-14	14	rep HEP	Ptpn21
2.68232009270426e-47	1.87337	0.311	0.079	4.24584447474157e-43	6	CN-M2	Ptpre
6.32453680042882e-113	1.87329	0.903	0.49	1.00111093013988e-108	6	CN-M2	Itgb2
5.10440460570719e-23	1.87326	0.421	0.146	8.07976205037392e-19	13	EC1	Fabp7
2.8610745021768e-20	1.87319	0.562	0.189	4.52879482949566e-16	15	OG	Srsf9
3.20081187274859e-44	1.87319	0.724	0.261	5.06656511337375e-40	14	rep HEP	Dlat
4.06775064311207e-33	1.87313	0.532	0.171	6.4388424929821e-29	14	rep HEP	Nasp
4.45744532759954e-29	1.87286	0.468	0.147	7.05569020905731e-25	14	rep HEP	Kifc3
9.43333994767445e-41	1.87286	0.695	0.281	1.49320338031739e-36	13	EC1	Slc16a1
5.89898326622507e-29	1.87279	0.719	0.236	9.33750061210767e-25	15	OG	Maf1
5.35836376850591e-67	1.87242	0.678	0.274	8.48175400916801e-63	6	CN-M2	H2-DMa
1.25703073011988e-37	1.87238	0.596	0.193	1.98975394270676e-33	14	rep HEP	Ttyh2
2.06493223062133e-32	1.87229	0.516	0.265	3.26858122785051e-28	8	CN-M1	Ifi204
1.31752376637576e-41	1.87227	0.331	0.098	2.08550836979619e-37	6	CN-M2	Mfsd10
1.46654749997286e-17	1.87204	0.562	0.224	2.32139803770705e-13	15	OG	Mylk
2.83410552217518e-35	1.87195	0.583	0.193	4.48610563105109e-31	14	rep HEP	Mgst3
2.1007058477692e-26	1.8718	0.366	0.149	3.32520728643386e-22	8	CN-M1	Il1r2
4.69754740261857e-36	1.87176	0.367	0.111	7.43574778360493e-32	9	CN	Ggta1
2.26076246983097e-72	1.87175	0.686	0.288	3.57856091349545e-68	6	CN-M2	Tmem106a
5.20767088406016e-23	1.87175	0.41	0.137	8.24322224237883e-19	14	rep HEP	Ftsj1
6.24065283085812e-47	1.87165	0.361	0.107	9.87832936596532e-43	6	CN-M2	Bcl2l11
4.4058936273775e-23	1.87154	0.329	0.094	6.97408902277584e-19	13	EC1	Alpl
1.31325479104078e-36	1.87147	0.654	0.256	2.07875100873845e-32	14	rep HEP	Pex11g
2.45894144136031e-29	1.87144	0.494	0.159	3.89225840752924e-25	14	rep HEP	Wfdc2
7.43961596926009e-36	1.87124	0.719	0.189	1.17761681177418e-31	15	OG	Cpxm1
7.66040389037792e-27	1.87122	0.254	0.071	1.21256533180792e-22	9	CN	B4galt6
4.92323451194269e-18	1.87112	0.371	0.095	7.79298790895409e-14	15	OG	Stfa2l1
4.73911867929311e-47	1.87076	0.718	0.237	7.50155095745306e-43	14	rep HEP	Apip
8.79955967965467e-83	1.87071	0.733	0.316	1.39288230169254e-78	6	CN-M2	Pld3
4.73913396753052e-31	1.87064	0.519	0.174	7.50157515720405e-27	14	rep HEP	Wwc1
2.72817930108919e-31	1.87058	0.899	0.445	4.31843501569409e-27	15	OG	Col14a1
2.14085385038665e-10	1.87057	0.258	0.076	3.38875755977704e-06	15	OG	Zdhhc8
7.95612728403059e-68	1.87045	0.981	0.665	1.2593753877892e-63	14	rep HEP	Ugt2b34
1.27449410321034e-23	1.87035	0.297	0.115	2.01739671597165e-19	8	CN-M1	Ifi209
1.4776785613678e-26	1.87023	0.429	0.133	2.3390173947891e-22	14	rep HEP	Polr3h
9.79211469832542e-39	1.86989	0.641	0.219	1.54999383559793e-34	14	rep HEP	Nectin1
7.68588818352574e-15	1.86951	0.303	0.077	1.21659924057029e-10	15	OG	Ccl12
7.19520887903191e-118	1.86939	1	0.927	1.13892961346196e-113	9	CN	Ctsd
2.19227740705265e-18	1.86935	0.295	0.089	3.47015590762364e-14	14	rep HEP	Alg8
1.97715884692096e-29	1.86884	0.742	0.261	3.12964473879119e-25	15	OG	Rgs10
1.10332642138504e-41	1.86877	0.718	0.266	1.74645539241038e-37	14	rep HEP	Pcsk6
1.35045662441444e-23	1.86872	0.685	0.262	2.13763779078562e-19	15	OG	Rit1
1.51894209033068e-19	1.86835	0.308	0.091	2.40433343478443e-15	14	rep HEP	Nr2c1
2.13447946586164e-35	1.86799	0.583	0.196	3.37866754651239e-31	14	rep HEP	Sgk2
7.68280519526528e-46	1.86741	0.699	0.23	1.21611123435854e-41	14	rep HEP	Smim8
1.28645693086354e-59	1.8673	0.949	0.526	2.03633267586391e-55	14	rep HEP	Akr1d1
1.00422291480235e-41	1.86722	0.451	0.145	1.58958445184064e-37	9	CN	Cd37
9.28672113051486e-47	1.86707	0.492	0.158	1.4699950877492e-42	9	CN	Csf2rb2
4.18900612519086e-33	1.86679	0.449	0.254	6.6307777955646e-29	2	HEP0	Cyp2b9
3.24973164970951e-30	1.86642	0.551	0.199	5.14400022832518e-26	14	rep HEP	Tm6sf2
8.16434406071147e-75	1.86618	0.987	0.72	1.29233402137002e-70	14	rep HEP	Cyb5b
3.72275673244122e-36	1.86595	0.353	0.125	5.8927516317812e-32	6	CN-M2	Ehd4
1.16496009901987e-30	1.8659	0.506	0.162	1.84401534073855e-26	14	rep HEP	Dhx32
8.68379187674324e-30	1.86496	0.409	0.172	1.37455741616969e-25	8	CN-M1	Fosl2
3.20243546937827e-58	1.86492	0.91	0.469	5.06913510447886e-54	14	rep HEP	Slc26a1
6.75668213814795e-26	1.86452	0.436	0.14	1.06951521564744e-21	14	rep HEP	Casp9
1.74348392639911e-11	1.8644	0.315	0.099	2.75976070709716e-07	15	OG	Psph
7.32169080907257e-57	1.8642	0.904	0.451	1.1589504381681e-52	14	rep HEP	G6pc
2.08756611610044e-33	1.86397	0.308	0.103	3.30440840517539e-29	6	CN-M2	Armcx2
1.34555332669967e-20	1.86317	0.447	0.251	2.12987636083291e-16	8	CN-M1	Ndrg1
3.27605839910428e-118	1.86299	0.897	0.441	5.18567283994216e-114	6	CN-M2	Anxa2
1.45329915912157e-28	1.86298	0.442	0.133	2.30042723897353e-24	14	rep HEP	Lclat1
4.44669018126994e-59	1.86297	0.456	0.138	7.03866588793219e-55	6	CN-M2	Cd37
2.34094150021409e-136	1.86269	0.989	0.681	3.70547630068888e-132	6	CN-M2	Clic1
7.49124415404653e-52	1.86184	0.598	0.226	1.18578903714402e-47	9	CN	Zeb2
6.56355621655452e-25	1.86169	0.391	0.118	1.03894531351841e-20	14	rep HEP	Glce
3.11004430528261e-50	1.86149	1	0.979	4.92288913083185e-46	15	OG	Rps12
1.07773364158937e-36	1.8614	0.59	0.192	1.70594458127181e-32	14	rep HEP	Dsp
8.22224837878181e-89	1.86135	0.742	0.302	1.30149969587737e-84	6	CN-M2	Pea15a
6.03281668647453e-66	1.86129	0.974	0.584	9.54934553302054e-62	14	rep HEP	Slc25a10
1.54271154140391e-37	1.86128	0.635	0.222	2.44195809888825e-33	14	rep HEP	Ifrd2
7.38808887717829e-60	1.86126	0.833	0.288	1.16946058836855e-55	14	rep HEP	Mup16
5.96244981556199e-80	1.8612	0.902	0.565	9.43796181305307e-76	9	CN	Glrx
2.92429308605191e-63	1.86116	0.572	0.211	4.62886352591157e-59	6	CN-M2	Il10ra
8.8793518039405e-41	1.86114	0.667	0.227	1.40551259704574e-36	14	rep HEP	Slc35d2
1.19899102556075e-126	1.86053	0.997	0.801	1.89788289436012e-122	6	CN-M2	Cd52
1.40509790114309e-19	1.86051	0.652	0.268	2.22412946771939e-15	15	OG	Tspan7
1.01572526988095e-22	1.86044	0.596	0.191	1.60779152969456e-18	15	OG	Tnfrsf21
8.55780038553121e-28	1.86015	0.379	0.144	1.35461422302573e-23	9	CN	Rassf4
5.73400570615901e-14	1.86009	0.258	0.06	9.07635763227910e-10	15	OG	Notch3
3.36482352163918e-91	1.85989	1	0.969	5.32617915240266e-87	14	rep HEP	Atp5mpl
3.88810339485033e-33	1.85984	0.294	0.095	6.15447886370859e-29	6	CN-M2	Gnptab
2.5101855437603e-80	1.8597	1	0.739	3.97337269721818e-76	14	rep HEP	Lonp2
6.70613206086605e-16	1.85946	0.36	0.096	1.06151364391449e-11	15	OG	Mfap4
5.50436220039803e-212	1.85927	1	0.736	8.71285492701004e-208	3	HEP4	Hacl1
3.10751044331644e-37	1.85906	0.667	0.253	4.91887828072559e-33	14	rep HEP	Mrpl46
2.47229593720289e-70	1.85872	0.625	0.238	3.91339723899845e-66	6	CN-M2	Gpsm3
1.69606642762363e-30	1.85859	0.809	0.291	2.68470354828544e-26	15	OG	Akr1b3
4.1556584345916e-17	1.85859	0.573	0.235	6.57799173611504e-13	15	OG	Elovl6
3.32281314222949e-10	1.85859	0.258	0.077	5.25968092283506e-06	15	OG	Plxna4os1
4.06118651482062e-38	1.85836	0.609	0.198	6.42845213430956e-34	14	rep HEP	Trip4
3.80121093603799e-36	1.85836	0.438	0.175	6.01693679065453e-32	8	CN-M1	Ptpn2
2.24279179652439e-49	1.85771	0.475	0.175	3.55011513471845e-45	6	CN-M2	Fgr
1.46547943738261e-10	1.85762	0.258	0.122	2.31970740143293e-06	9	CN	Ltf
8.39264834093646e-106	1.85761	1	0.809	1.32847230588683e-101	9	CN	Pfn1
2.10800502831933e-20	1.8575	0.457	0.284	3.33676115932666e-16	2	HEP0	Cyp7b1
2.24887378889702e-78	1.85748	1	0.927	3.5597423204451e-74	14	rep HEP	Apoc2
1.65313096900629e-61	1.85733	0.652	0.154	2.61674101084005e-57	13	EC1	mt-Atp8
3.45325351082763e-124	1.85701	1	0.818	5.46615498228905e-120	6	CN-M2	H2-Ab1
1.8445562951508e-56	1.8569	0.572	0.185	2.9197481595942e-52	9	CN	Rab8b
9.38129967343727e-20	1.85689	0.276	0.075	1.48496592530839e-15	14	rep HEP	Rnf125
3.11429205876666e-10	1.85641	0.315	0.109	4.92961289982175e-06	15	OG	Zfp703
6.43685416452387e-11	1.85593	0.258	0.073	1.01888964570248e-06	15	OG	Slc8a1
1.71030110579623e-109	1.85587	0.908	0.508	2.70723562036485e-105	6	CN-M2	Coro1a
3.20095846498927e-42	1.85585	0.369	0.121	5.06679715423152e-38	6	CN-M2	Myo1g
3.96088548046113e-85	1.85582	1	0.845	6.26968562702192e-81	14	rep HEP	Adh5
3.17379637960076e-33	1.85579	0.519	0.159	5.02380228927004e-29	14	rep HEP	Yae1d1
9.31621838084119e-72	1.85573	0.544	0.17	1.47466420750335e-67	6	CN-M2	Syk
8.16379769770622e-59	1.85543	0.771	0.246	1.29224753756992e-54	12	HEP2	Serpina7
1.06902171155084e-50	1.85537	0.853	0.427	1.69215446721383e-46	14	rep HEP	Hjv
2.65458800189704e-61	1.85532	0.955	0.508	4.20194734820283e-57	14	rep HEP	Kynu
6.59395303486546e-84	1.85506	0.924	0.576	1.04375682588885e-79	9	CN	Cybb
2.90046669307777e-49	1.85503	0.795	0.305	4.5911487284728e-45	14	rep HEP	Apex1
7.60142630788105e-55	1.85498	0.923	0.479	1.20322977027449e-50	14	rep HEP	Zbtb8os
1.64899491389925e-46	1.85491	0.903	0.767	2.61019404921113e-42	8	CN-M1	Hbb-bs
2.38830585707487e-61	1.85465	0.962	0.556	3.78044934116381e-57	14	rep HEP	Cs
4.80815654133796e-54	1.85442	0.814	0.287	7.61083098928386e-50	14	rep HEP	Eif1ad
4.77457379018897e-12	1.85424	0.36	0.12	7.55767285249012e-08	15	OG	Hpse
2.58041993326093e-117	1.854	0.922	0.481	4.08454671235872e-113	6	CN-M2	Alox5ap
1.39011304885568e-44	1.85364	0.718	0.25	2.20040994503366e-40	14	rep HEP	Fbxo8
8.58915551760874e-131	1.85355	0.833	0.354	1.35957742688229e-126	3	HEP4	Slc2a2
4.43775681741331e-27	1.85349	0.289	0.106	7.02452526628352e-23	6	CN-M2	Gpr65
2.69660198228719e-26	1.85324	0.253	0.08	4.2684512777624e-22	8	CN-M1	Clec5a
1.15447763887477e-56	1.85303	0.846	0.312	1.82742265457487e-52	14	rep HEP	Pi4k2a
4.59319342843947e-36	1.853	0.888	0.338	7.27056587787684e-32	15	OG	Slc25a4
[truncated: 34,313 more rows]

## Sheet: Final-log2FC-Raw
Column1	p_val	avg_log2FC	pct.1	pct.2	p_val_adj	Cluster Number	Cluster Name	gene
Mmp22	9.16031528838154e-56	2.17274	0.511	0.235	1.44998630699791e-51	0	M	Mmp2
Aebp12	3.77318577764104e-34	2.06289	0.345	0.16	5.972575767428e-30	0	M	Aebp1
Olfml32	2.8571439114304e-47	2.02322	0.487	0.25	4.52257309740318e-43	0	M	Olfml3
Cd741	3.26672050548782e-192	2.01103	1	0.928	5.17089188813667e-188	0	M	Cd74
Pacs22	2.02514025071186e-53	1.99228	0.568	0.331	3.2055945028518e-49	0	M	Pacs2
Ngp1	1.41582556073941e-09	1.87976	0.423	0.283	2.24111028009441e-05	0	M	Ngp
Ewsr13	6.73003760287887e-138	1.84402	0.956	0.727	1.0652976521597e-133	0	M	Ewsr1
Clu	6.09706892410782e-41	1.83282	1	0.994	9.65105039997027e-37	0	M	Clu
Cdk11b2	3.95066708550162e-102	1.82	0.849	0.515	6.25351092964051e-98	0	M	Cdk11b
Parp82	2.68620991870396e-20	1.76705	0.277	0.145	4.2520016803165e-16	0	M	Parp8
Nisch1	1.52419615818914e-99	1.76472	0.923	0.717	2.41265009879759e-95	0	M	Nisch
Cpxm12	4.7297607141265e-23	1.7421	0.332	0.183	7.48673823439083e-19	0	M	Cpxm1
Poglut11	5.32899378788316e-14	1.72539	0.327	0.229	8.43526426684025e-10	0	M	Poglut1
Col6a22	1.04378302877572e-22	1.70349	0.308	0.16	1.65220415624909e-18	0	M	Col6a2
Loxl12	4.83075627213486e-17	1.68837	0.268	0.147	7.64660410316227e-13	0	M	Loxl1
Gpx32	2.16077874708567e-63	1.62062	0.649	0.338	3.4202966787619e-59	0	M	Gpx3
Col1a12	2.517984365424e-138	1.61048	0.911	0.465	3.98571745202966e-134	0	M	Col1a1
Igha1	5.34226899491422e-23	1.5729	0.561	0.367	8.45627759204973e-19	0	M	Igha
Ikbkb1	2.98257335155045e-95	1.56844	0.943	0.657	4.72111535816921e-91	0	M	Ikbkb
Rpl42	5.41078102943148e-144	1.56052	0.998	0.98	8.5647252914871e-140	0	M	Rpl4
Dock82	2.76448321727381e-19	1.5386	0.452	0.333	4.37590048462272e-15	0	M	Dock8
Wasf22	1.364865015625e-34	1.5293	0.589	0.399	2.16044483323281e-30	0	M	Wasf2
Igkc2	9.49646616096379e-40	1.52479	0.793	0.533	1.50319562861896e-35	0	M	Igkc
Camp1	1.29919846932684e-06	1.48024	0.424	0.322	0.020565	0	M	Camp
Col1a22	4.54429387935699e-125	1.46478	0.917	0.56	7.19316278163418e-121	0	M	Col1a2
F2r1	3.22647210410014e-13	1.44855	0.458	0.388	5.10718269358011e-09	0	M	F2r
Bgn2	3.77500236976777e-72	1.4401	0.878	0.685	5.97545125110541e-68	0	M	Bgn
Sparc2	9.31653339119048e-100	1.4032	0.93	0.798	1.47471407049154e-95	0	M	Sparc
Col3a12	7.91223334450211e-116	1.38921	0.937	0.72	1.25242741610124e-111	0	M	Col3a1
Adamts22	6.51334755183673e-10	1.3648	0.273	0.186	1.03099778398024e-05	0	M	Adamts2
Col4a22	7.24886556042189e-67	1.35345	0.852	0.538	1.14742292955918e-62	0	M	Col4a2
Lum2	1.3293185361455e-35	1.33408	0.625	0.419	2.10417831086471e-31	0	M	Lum
Csnk2a21	1.31843486600938e-08	1.3307	0.371	0.314	0.000208695	0	M	Csnk2a2
Prex12	1.82853821937204e-08	1.32514	0.306	0.234	0.000289439	0	M	Prex1
Ccdc802	1.80213223177392e-22	1.30732	0.518	0.343	2.85259510967494e-18	0	M	Ccdc80
Spag92	1.56148118864178e-32	1.28674	0.677	0.495	2.47166857350107e-28	0	M	Spag9
Ptprc5	2.95902107884258e-34	1.27954	0.616	0.42	4.68383446569992e-30	0	M	Ptprc
Dync1h11	5.65463399337908e-46	1.23895	0.823	0.594	8.95072014811975e-42	0	M	Dync1h1
Cxcl121	2.07951477415305e-20	1.23807	0.819	0.766	3.29166393600686e-16	0	M	Cxcl12
Igfbp72	5.45243178799765e-51	1.23591	0.908	0.911	8.63065427722148e-47	0	M	Igfbp7
Spp12	6.93874983192413e-25	1.22852	0.882	0.617	1.09833471089527e-20	0	M	Spp1
H2-Eb12	1.16460766367002e-80	1.21525	0.982	0.722	1.84345747082328e-76	0	M	H2-Eb1
Acta22	1.10809118007747e-24	1.20766	0.36	0.183	1.75399752894462e-20	0	M	Acta2
H2afz2	4.9874016294799e-71	1.16423	0.972	0.894	7.89455803930373e-67	0	M	H2afz
H2-Ab12	9.31182615687252e-88	1.15072	0.985	0.813	1.47396896237135e-83	0	M	H2-Ab1
Lsp13	5.71641781107424e-11	1.14978	0.397	0.312	9.04851775314942e-07	0	M	Lsp1
Cdk42	3.32997351763355e-32	1.14535	0.714	0.515	5.27101508106215e-28	0	M	Cdk4
Cd632	1.34305503519514e-62	1.13927	0.808	0.47	2.12592181521039e-58	0	M	Cd63
Gramd1a2	4.68183896363702e-10	1.12215	0.413	0.35	7.41088289554104e-06	0	M	Gramd1a
Vps4b2	2.86907548822964e-51	1.11618	0.876	0.636	4.5414595903187e-47	0	M	Vps4b
Flna3	1.75691058874248e-50	1.10886	0.804	0.505	2.78101377092047e-46	0	M	Flna
Lbh2	0.00092026	1.10872	0.253	0.221	1	0	M	Lbh
Postn2	6.7605388488051e-22	1.10859	0.417	0.245	1.07012569437736e-17	0	M	Postn
Shisa53	2.22606262788555e-42	1.1077	0.828	0.598	3.52363453368004e-38	0	M	Shisa5
Mgp2	3.9730510123003e-30	1.09624	0.469	0.242	6.28894244737015e-26	0	M	Mgp
Col6a32	3.93243377136113e-11	1.08455	0.351	0.249	6.22464941668752e-07	0	M	Col6a3
Nupr13	9.12277501009704e-14	1.0835	0.463	0.359	1.44404405634826e-09	0	M	Nupr1
Col4a12	7.77843840478597e-54	1.07677	0.882	0.637	1.23124901509357e-49	0	M	Col4a1
Timp22	3.25655458912129e-10	1.07641	0.382	0.282	5.15480025912008e-06	0	M	Timp2
Ppic2	1.93617950934927e-10	1.07243	0.354	0.26	3.06477854534897e-06	0	M	Ppic
Pld42	3.03554973435499e-28	1.07192	0.675	0.47	4.80497167451051e-24	0	M	Pld4
Fstl12	2.0691535837396e-14	1.05603	0.345	0.219	3.27526320770141e-10	0	M	Fstl1
Arhgap452	2.73750318119111e-05	1.05014	0.334	0.293	0.433319	0	M	Arhgap45
Sec23b	2.45035544333615e-11	1.04931	0.568	0.509	3.8786676312568e-07	0	M	Sec23b
Dek1	4.08999540484257e-23	1.03595	0.672	0.528	6.4740537263253e-19	0	M	Dek
Serpinh12	4.54114974364756e-77	1.0144	0.854	0.473	7.18818592921972e-73	0	M	Serpinh1
C1qb2	4.47228121305431e-45	0.99533	0.974	0.916	7.07917393214367e-41	0	M	C1qb
H2-Aa2	1.39092999333584e-70	0.992033	0.994	0.771	2.2017030864513e-66	0	M	H2-Aa
BC0055373	3.78475421456712e-42	0.978298	0.926	0.833	5.99088744623829e-38	0	M	BC005537
Ms4a72	1.13061286691656e-28	0.970185	0.491	0.268	1.78964710704223e-24	0	M	Ms4a7
Col5a12	2.41294247377457e-30	0.964766	0.507	0.293	3.81944664173777e-26	0	M	Col5a1
Anxa13	2.53634049024797e-19	0.961679	0.489	0.312	4.01477336201351e-15	0	M	Anxa1
Efemp22	7.76803523783813e-09	0.961025	0.33	0.242	0.00012296	0	M	Efemp2
Rcn32	4.75550721430983e-13	0.952245	0.434	0.321	7.52749236953104e-09	0	M	Rcn3
Tardbp1	2.88894124205527e-14	0.929026	0.646	0.526	4.57290509204929e-10	0	M	Tardbp
Mkrn12	9.08139570177318e-08	0.914433	0.482	0.425	0.00143749	0	M	Mkrn1
Tpm11	1.24074549168639e-24	0.896816	0.694	0.497	1.96397603879039e-20	0	M	Tpm1
Tpm33	1.84603461869262e-30	0.895354	0.862	0.646	2.92208819792855e-26	0	M	Tpm3
Ubr41	2.10304955284185e-10	0.885318	0.574	0.498	3.32891713719336e-06	0	M	Ubr4
Pltp2	2.29537904797295e-16	0.862889	0.703	0.533	3.63335549503639e-12	0	M	Pltp
C1qc2	2.65543264120763e-34	0.859532	0.926	0.884	4.20328432776756e-30	0	M	C1qc
Clic14	4.04515364874471e-40	0.854896	0.891	0.681	6.403073710598e-36	0	M	Clic1
Psap3	2.35406699198892e-50	0.854771	0.996	0.971	3.72625264161927e-46	0	M	Psap
Rac12	1.27568002857743e-30	0.842056	0.906	0.802	2.01927391723521e-26	0	M	Rac1
Fbn12	1.27151296821989e-05	0.84119	0.275	0.212	0.201268	0	M	Fbn1
Unc93b12	1.25097302228415e-25	0.824032	0.839	0.614	1.98016519697359e-21	0	M	Unc93b1
Bmp11	5.49798752020132e-21	0.817191	0.797	0.603	8.70276444572668e-17	0	M	Bmp1
Ivns1abp1	3.4885588430813e-24	0.801966	0.769	0.564	5.52203979271339e-20	0	M	Ivns1abp
Arrb22	1.63212390444261e-12	0.798854	0.572	0.449	2.5834889283422e-08	0	M	Arrb2
Itm2c2	2.25878166746462e-09	0.797515	0.609	0.514	3.57542550142975e-05	0	M	Itm2c
Col5a22	5.70232284990292e-29	0.795699	0.509	0.282	9.02620683911133e-25	0	M	Col5a2
Stab12	7.78545029915443e-20	0.779308	0.76	0.565	1.23235892785315e-15	0	M	Stab1
Actb4	1.12506316119627e-39	0.764166	0.996	0.971	1.78086247785758e-35	0	M	Actb
Coro1a4	3.11972032664037e-34	0.762634	0.793	0.506	4.93820530503904e-30	0	M	Coro1a
Cxcl52	1.20270507294097e-10	0.760961	0.362	0.252	1.90376185995827e-06	0	M	Cxcl5
Ypel32	1.36727756004222e-23	0.755199	0.852	0.728	2.16426364979083e-19	0	M	Ypel3
Tm9sf31	5.18136643633438e-14	0.749217	0.867	0.768	8.20158493207369e-10	0	M	Tm9sf3
Csf3r5	0.00179163	0.747885	0.293	0.257	1	0	M	Csf3r
Sidt21	2.70431368669713e-17	0.746583	0.753	0.595	4.28065813467288e-13	0	M	Sidt2
Cyth42	3.53561078790838e-06	0.735593	0.404	0.342	0.0559652	0	M	Cyth4
Ifngr12	7.02956285182736e-23	0.730724	0.801	0.569	1.11270950381575e-18	0	M	Ifngr1
Mapk32	2.57093151454181e-19	0.725556	0.755	0.548	4.06952749436823e-15	0	M	Mapk3
Vav14	0.00179961	0.715451	0.328	0.306	1	0	M	Vav1
Sirpa3	5.11069901489521e-26	0.714313	0.845	0.618	8.08972547067762e-22	0	M	Sirpa
Pgls2	6.11061333240241e-13	0.711809	0.841	0.724	9.67248984385978e-09	0	M	Pgls
Ly861	0.000964071	0.70552	0.421	0.402	1	0	M	Ly86
Aif12	4.39217551917955e-26	0.702497	0.828	0.596	6.95237462930931e-22	0	M	Aif1
Rhoc3	1.07355231465082e-18	0.699195	0.705	0.504	1.69932595886078e-14	0	M	Rhoc
Rbp12	9.55052713470289e-23	0.698339	0.821	0.611	1.51175294015212e-18	0	M	Rbp1
Fus1	3.73430525476536e-08	0.692071	0.552	0.472	0.000591103	0	M	Fus
Iqgap14	8.26104483494107e-05	0.689593	0.371	0.331	1	0	M	Iqgap1
Ccl54	1.26096027631091e-47	0.685024	0.795	0.489	1.99597402137254e-43	0	M	Ccl5
Hexa2	2.61294926893437e-16	0.681644	0.806	0.638	4.13603739779621e-12	0	M	Hexa
Cmtm73	2.20047085279152e-11	0.681567	0.544	0.4	3.4831253128837e-07	0	M	Cmtm7
AC149090.11	1.0776185968176e-11	0.680944	0.766	0.611	1.70576247690258e-07	0	M	AC149090.1
Tln12	3.86011282428722e-16	0.680876	0.747	0.562	6.11017258956424e-12	0	M	Tln1
Mtch11	2.37202872450446e-11	0.679867	0.681	0.542	3.75468426801811e-07	0	M	Mtch1
Itgb52	2.15353542909561e-06	0.677669	0.544	0.459	0.0340883	0	M	Itgb5
Egfl71	9.13128003009288e-15	0.677587	0.755	0.57	1.4453903159634e-10	0	M	Egfl7
H2-DMb12	0.00261512	0.674948	0.328	0.3	1	0	M	H2-DMb1
Csk2	9.6921812203914e-13	0.674793	0.696	0.553	1.53417536537576e-08	0	M	Csk
Ptpn63	2.19185363875375e-17	0.669754	0.666	0.481	3.46948512478332e-13	0	M	Ptpn6
Laptm54	3.17048573097234e-22	0.662844	0.786	0.554	5.01856186355612e-18	0	M	Laptm5
Gsn2	1.03644515079911e-08	0.660617	0.445	0.334	0.000164059	0	M	Gsn
Atpif12	1.62428146167662e-20	0.656351	0.897	0.787	2.57107512568792e-16	0	M	Atpif1
Limd22	3.10686298365679e-09	0.652537	0.581	0.468	4.91785341683033e-05	0	M	Limd2
Txnip3	7.72200473367946e-16	0.641717	0.777	0.6	1.22231612929412e-11	0	M	Txnip
Ucp22	6.58751401185336e-25	0.638868	0.828	0.615	1.04273759293627e-20	0	M	Ucp2
Diaph13	0.000809244	0.638102	0.463	0.436	1	0	M	Diaph1
Syf21	2.61953790646529e-07	0.636939	0.609	0.522	0.00414647	0	M	Syf2
Myl62	1.32165591757945e-23	0.635844	0.98	0.955	2.0920491519365e-19	0	M	Myl6
Atp6v0b2	1.60483914183009e-20	0.633587	0.895	0.826	2.54029987760285e-16	0	M	Atp6v0b
Tubb53	9.80607476738758e-19	0.633096	0.882	0.734	1.55220357492978e-14	0	M	Tubb5
Fkbp8	5.51334703640198e-16	0.632911	0.911	0.826	8.7270770239207e-12	0	M	Fkbp8
Arpc1b2	3.67921987799077e-35	0.629697	0.928	0.834	5.82383714487158e-31	0	M	Arpc1b
Tcirg13	5.57465234359424e-18	0.627103	0.729	0.534	8.82411719467532e-14	0	M	Tcirg1
Tmsb104	5.06507565571017e-53	0.617068	0.982	0.813	8.01750825542362e-49	0	M	Tmsb10
Zyx3	3.23898211062303e-15	0.607708	0.696	0.528	5.12698478290519e-11	0	M	Zyx
Ptpn182	5.16071629961408e-08	0.606632	0.611	0.514	0.00081689	0	M	Ptpn18
Stat13	1.45626772828642e-15	0.603752	0.793	0.622	2.30512618710458e-11	0	M	Stat1
Lyz22	5.5279609945101e-58	0.599333	1	0.935	8.75020945821004e-54	0	M	Lyz2
C1qa2	5.52682258350081e-17	0.597649	0.871	0.837	8.74840746742343e-13	0	M	C1qa
Mcrip12	3.72335577193744e-05	0.594453	0.554	0.491	0.58937	0	M	Mcrip1
Tm7sf3	3.56344830886284e-09	0.593396	0.755	0.595	5.64058232809898e-05	0	M	Tm7sf3
Vcam12	6.19551091860023e-06	0.568352	0.557	0.489	0.0980687	0	M	Vcam1
Alox5ap4	1.09771107889105e-30	0.559322	0.773	0.481	1.73756686677664e-26	0	M	Alox5ap
Gm2a2	1.24334195051712e-08	0.552218	0.779	0.624	0.000196809	0	M	Gm2a
Col14a11	5.01631337291811e-05	0.550587	0.513	0.446	0.794032	0	M	Col14a1
Hnrnpa2b11	8.81037379599014e-16	0.550473	0.923	0.915	1.39459406816728e-11	0	M	Hnrnpa2b1
Pirb4	1.56058092874216e-23	0.545387	0.705	0.457	2.47024355210596e-19	0	M	Pirb
Rac24	1.7228793582783e-21	0.544247	0.838	0.595	2.72714573621872e-17	0	M	Rac2
Txndc15	1.8014809619446e-09	0.544081	0.814	0.655	2.85156421466211e-05	0	M	Txndc15
Syngr22	3.41472124444313e-09	0.541778	0.768	0.631	5.40516225782903e-05	0	M	Syngr2
Ap2m11	1.78615657637052e-08	0.541336	0.9	0.85	0.000282731	0	M	Ap2m1
Ctsd3	1.58318715753073e-23	0.535183	0.958	0.927	2.5060269516554e-19	0	M	Ctsd
Gnb12	1.76822546298794e-12	0.533774	0.788	0.614	2.79892408536361e-08	0	M	Gnb1
Grk22	0.00962101	0.527401	0.472	0.45	1	0	M	Grk2
Raly1	3.72185843660031e-10	0.526728	0.714	0.558	5.89132971929463e-06	0	M	Raly
Prelp	7.20830590239938e-10	0.52578	0.697	0.534	1.1410027412908e-05	0	M	Prelp
Arhgdib3	2.48134492816952e-13	0.522216	0.681	0.512	3.92772088679954e-09	0	M	Arhgdib
Emp32	4.2836936432213e-13	0.520364	0.522	0.355	6.780658667855e-09	0	M	Emp3
Fxyd54	1.78273009121123e-35	0.519214	0.845	0.533	2.82188346137825e-31	0	M	Fxyd5
Picalm3	1.5987182901933e-16	0.50635	0.788	0.581	2.53061118154698e-12	0	M	Picalm
Tyrobp3	1.4755325765841e-31	0.501144	0.994	0.927	2.33562051547498e-27	0	M	Tyrobp
Ubb3	1.61535106296063e-16	0.500732	0.978	0.966	2.55693919756038e-12	0	M	Ubb
Arhgdia3	1.18658039348221e-10	0.491835	0.86	0.707	1.87823810484299e-06	0	M	Arhgdia
Tuba1a3	6.71290470409258e-05	0.490295	0.406	0.344	1	0	M	Tuba1a
Cst32	2.92122270774498e-10	0.489004	0.937	0.926	4.62400342408953e-06	0	M	Cst3
Rpl292	6.22307286333829e-13	0.487531	0.97	0.978	9.85050203537819e-09	0	M	Rpl29
Gnai23	1.28176394037455e-11	0.485826	0.828	0.69	2.02890414121887e-07	0	M	Gnai2
Fabp43	1.71568802438921e-11	0.484757	0.784	0.599	2.71576257380567e-07	0	M	Fabp4
Itgb24	7.05321839030097e-26	0.482993	0.766	0.49	1.11645393900074e-21	0	M	Itgb2
Ctsz3	1.16607822557615e-18	0.476853	0.956	0.917	1.84578522326449e-14	0	M	Ctsz
Rpl372	1.64339400355241e-23	0.475495	1	0.999	2.60132836822311e-19	0	M	Rpl37
Nedd41	6.74092473374264e-08	0.475279	0.751	0.616	0.00106702	0	M	Nedd4
Tcf253	9.85069663027463e-08	0.471401	0.795	0.654	0.00155927	0	M	Tcf25
Rsrp11	3.65946232789779e-09	0.465744	0.887	0.851	5.79256291882942e-05	0	M	Rsrp1
Cyba4	2.5687427555871e-28	0.46412	0.878	0.666	4.06606290781882e-24	0	M	Cyba
Srsf61	1.40645277333704e-05	0.458738	0.666	0.561	0.222627	0	M	Srsf6
Nenf2	3.21896676176286e-06	0.457924	0.758	0.617	0.050953	0	M	Nenf
Csf1r2	7.71061394673171e-12	0.456992	0.865	0.754	1.22051308162816e-07	0	M	Csf1r
Metap1d	0.00527273	0.455515	0.234	0.328	1	0	M	Metap1d
Calu1	8.75450359995237e-06	0.447349	0.662	0.549	0.138575	0	M	Calu
Rhog4	1.30459188892691e-18	0.443055	0.784	0.55	2.06503850098241e-14	0	M	Rhog
Apoe	0.00552937	0.442706	0.998	1	1	0	M	Apoe
Sf3b12	1.96248993706764e-06	0.442102	0.685	0.572	0.0310643	0	M	Sf3b1
Sod31	8.88176314399316e-12	0.439125	0.764	0.563	1.40589428806268e-07	0	M	Sod3
Crip12	9.7248822520971e-15	0.438043	0.762	0.609	1.53935161168445e-10	0	M	Crip1
Maged11	1.26545622878686e-09	0.436927	0.736	0.586	2.00309066454672e-05	0	M	Maged1
Cebpd3	6.59728057949459e-08	0.436818	0.668	0.55	0.00104428	0	M	Cebpd
Ptbp12	4.2557253132451e-06	0.432144	0.708	0.59	0.0673639	0	M	Ptbp1
Reep52	4.22912632862696e-08	0.430421	0.638	0.51	0.000669428	0	M	Reep5
Vmp13	4.66366042052504e-16	0.424627	0.893	0.747	7.38210807964908e-12	0	M	Vmp1
Ddx39b2	0.00206074	0.423811	0.565	0.507	1	0	M	Ddx39b
Npc22	4.44534695767854e-14	0.421516	0.941	0.878	7.03653969930936e-10	0	M	Npc2
Ube2s2	3.10642948599735e-10	0.420469	0.832	0.654	4.91716723338521e-06	0	M	Ube2s
Ywhaz3	1.09461693985807e-07	0.420168	0.852	0.692	0.00173267	0	M	Ywhaz
Snrpd12	1.16951490818606e-08	0.420061	0.795	0.627	0.000185123	0	M	Snrpd1
Ctsa2	4.53628106532e-07	0.419124	0.862	0.799	0.00718048	0	M	Ctsa
Osbpl91	3.50180304371536e-08	0.417993	0.766	0.616	0.0005543	0	M	Osbpl9
Fcer1g4	2.52033526504046e-38	0.413245	0.967	0.867	3.98943869103255e-34	0	M	Fcer1g
Pkig2	0.000329359	0.412175	0.589	0.52	1	0	M	Pkig
Cfp2	3.69942773044097e-05	0.410768	0.727	0.596	0.585582	0	M	Cfp
Ctsc3	2.1208885622963e-22	0.410326	0.983	0.892	3.35715450525881e-18	0	M	Ctsc
Itm2b2	3.13800962506281e-07	0.408569	0.982	0.99	0.00496716	0	M	Itm2b
Gnb22	3.96051776333651e-09	0.408113	0.876	0.793	6.26910356758537e-05	0	M	Gnb2
Cfl13	8.75240653203013e-18	0.407456	0.917	0.896	1.38541842995505e-13	0	M	Cfl1
Wdr13	1.62632427523494e-08	0.405669	0.692	0.539	0.000257431	0	M	Wdr1
Tmem50a2	0.00154035	0.403458	0.828	0.752	1	0	M	Tmem50a
Igfbp31	0.00999593	0.401361	0.465	0.397	1	0	M	Igfbp3
Tagln23	1.36359258754609e-20	0.39928	0.838	0.594	2.1584307068267e-16	0	M	Tagln2
Selenow2	1.20949574633448e-05	0.398468	0.911	0.93	0.191451	0	M	Selenow
Rrbp11	2.89014806198572e-06	0.394006	0.893	0.861	0.0457482	0	M	Rrbp1
Ctss2	2.68258554836167e-26	0.393893	0.943	0.802	4.24626466450169e-22	0	M	Ctss
Tmed91	5.26620377189233e-07	0.391117	0.845	0.702	0.00833587	0	M	Tmed9
Actg14	2.54350589458524e-34	0.388317	0.982	0.921	4.02611548053898e-30	0	M	Actg1
Sh3bgrl34	1.19888177402436e-25	0.387581	0.873	0.673	1.89770996010315e-21	0	M	Sh3bgrl3
Man2b12	4.14203806163569e-08	0.385386	0.768	0.609	0.000655643	0	M	Man2b1
Mtus1	0.000140859	0.384516	0.718	0.6	1	0	M	Mtus1
Ctsb2	4.0397516702696e-12	0.382891	0.98	0.981	6.39452291886974e-08	0	M	Ctsb
Ddb11	4.07470179056873e-06	0.382376	0.797	0.662	0.0644985	0	M	Ddb1
Ddx172	0.00204034	0.380582	0.62	0.547	1	0	M	Ddx17
Cd300c22	1.83262038037613e-06	0.380253	0.576	0.464	0.0290085	0	M	Cd300c2
Ptma3	4.49146382279063e-08	0.379314	0.904	0.924	0.000710954	0	M	Ptma
Atp6ap12	1.28303681659115e-06	0.379089	0.729	0.587	0.0203092	0	M	Atp6ap1
Ly6a3	2.73217853908011e-14	0.378384	0.889	0.701	4.32476540950991e-10	0	M	Ly6a
Atp6v1b22	0.00267245	0.376627	0.535	0.482	1	0	M	Atp6v1b2
H2-Q73	0.000581753	0.374871	0.801	0.719	1	0	M	H2-Q7
H2afv1	9.57965500578213e-05	0.370252	0.766	0.647	1	0	M	H2afv
Hnrnpab2	0.00407044	0.368527	0.843	0.749	1	0	M	Hnrnpab
Ywhaq2	0.000939163	0.366208	0.784	0.672	1	0	M	Ywhaq
Gaa1	0.00242325	0.362995	0.659	0.57	1	0	M	Gaa
Fkbp1a3	9.22544211723801e-07	0.360869	0.823	0.671	0.014603	0	M	Fkbp1a
Pgd3	4.95867282723856e-09	0.359675	0.673	0.524	7.84908321823591e-05	0	M	Pgd
Cybb4	5.96776075790705e-18	0.359604	0.823	0.567	9.44636850369106e-14	0	M	Cybb
H2afj2	0.000634949	0.358911	0.851	0.771	1	0	M	H2afj
Mpeg13	2.08291381330817e-15	0.356571	0.882	0.749	3.2970442750855e-11	0	M	Mpeg1
Anxa61	6.83446048566066e-07	0.356288	0.708	0.579	0.0108183	0	M	Anxa6
Myl12b2	7.24946299571679e-08	0.3552	0.88	0.806	0.00114752	0	M	Myl12b
Bax2	1.78395735236795e-09	0.353325	0.799	0.618	2.82382609306323e-05	0	M	Bax
Capns12	0.000301979	0.353309	0.828	0.733	1	0	M	Capns1
App4	1.96045855783027e-12	0.34836	0.827	0.628	3.10320985118953e-08	0	M	App
Glmp2	0.000183302	0.347349	0.696	0.584	1	0	M	Glmp
Asah12	0.000314638	0.344782	0.625	0.534	1	0	M	Asah1
Ece1	0.000209276	0.343494	0.699	0.58	1	0	M	Ece1
Dcn1	5.87907278490376e-05	0.340186	0.862	0.823	0.930598	0	M	Dcn
Ddx52	8.89948833864588e-08	0.339754	0.908	0.917	0.0014087	0	M	Ddx5
Sar1a1	9.32993933578626e-05	0.339286	0.742	0.618	1	0	M	Sar1a
Ergic31	0.00405877	0.338935	0.801	0.677	1	0	M	Ergic3
Eif3g1	0.000127558	0.333959	0.685	0.585	1	0	M	Eif3g
Naxd	0.000103158	0.332847	0.672	0.56	1	0	M	Naxd
Fcgr34	1.71173824031339e-21	0.330594	0.782	0.523	2.70951046059206e-17	0	M	Fcgr3
Puf601	0.000579507	0.329809	0.649	0.552	1	0	M	Puf60
Rbm392	0.000420055	0.32806	0.786	0.669	1	0	M	Rbm39
Commd41	0.000515676	0.32658	0.613	0.529	1	0	M	Commd4
Gns2	1.94887684838945e-05	0.326334	0.732	0.615	0.308488	0	M	Gns
Grn2	5.13583493666977e-05	0.322184	0.876	0.901	0.812951	0	M	Grn
Lgmn2	2.9423874558648e-10	0.321577	0.887	0.836	4.65750510388839e-06	0	M	Lgmn
Ywhah2	5.1961597818744e-10	0.320566	0.79	0.608	8.22500131872898e-06	0	M	Ywhah
Stub11	2.53622816506553e-05	0.319802	0.707	0.584	0.40146	0	M	Stub1
Irf2bp22	0.00310608	0.315628	0.605	0.529	1	0	M	Irf2bp2
Cd523	6.07360509007206e-24	0.310917	0.915	0.803	9.61390949707506e-20	0	M	Cd52
Ifi303	5.43813131543885e-12	0.310707	0.856	0.66	8.60801805920815e-08	0	M	Ifi30
Ssna11	0.000413882	0.309886	0.603	0.528	1	0	M	Ssna1
Gas61	0.00317535	0.308618	0.256	0.359	1	0	M	Gas6
Cd683	1.20597108213657e-12	0.306857	0.707	0.521	1.90893162591398e-08	0	M	Cd68
Nucb11	0.000304458	0.306614	0.72	0.596	1	0	M	Nucb1
Grb23	3.75406901791116e-05	0.304893	0.686	0.561	0.594232	0	M	Grb2
Tpm43	2.34310553406834e-08	0.30363	0.539	0.401	0.00037089	0	M	Tpm4
Eef21	0.00213621	0.303459	0.958	0.964	1	0	M	Eef2
Epas11	0.000479596	0.302658	0.753	0.628	1	0	M	Epas1
Arpc43	7.01329615602372e-05	0.301605	0.784	0.65	1	0	M	Arpc4
Prelid12	5.61015093045175e-05	0.2981	0.904	0.902	0.888031	0	M	Prelid1
Ccnl21	0.000517627	0.297935	0.664	0.56	1	0	M	Ccnl2
Atp1a11	0.00173703	0.297682	0.847	0.792	1	0	M	Atp1a1
Itgb12	0.00030225	0.296996	0.814	0.686	1	0	M	Itgb1
H1f0	0.000570729	0.296461	0.788	0.67	1	0	M	H1f0
Ly6e1	2.23174516761747e-06	0.296033	0.993	0.962	0.0353263	0	M	Ly6e
Tmem176b	0.000170653	0.295579	0.941	0.93	1	0	M	Tmem176b
Vps292	0.00141056	0.295031	0.666	0.57	1	0	M	Vps29
Marcks4	4.37795637479316e-10	0.294774	0.707	0.525	6.92986714566009e-06	0	M	Marcks
Gak1	0.000163376	0.292617	0.264	0.394	1	0	M	Gak
Rpl53	3.58027775372554e-05	0.289411	0.967	0.962	0.566722	0	M	Rpl5
Gng123	0.000207788	0.288964	0.668	0.56	1	0	M	Gng12
Vps282	0.00614067	0.287329	0.747	0.65	1	0	M	Vps28
Ccdc122	9.3072785752864e-05	0.287089	0.76	0.617	1	0	M	Ccdc12
Serinc32	7.32805594788805e-06	0.282554	0.865	0.824	0.115996	0	M	Serinc3
Tgfbi3	9.26855997555573e-21	0.27946	0.88	0.611	1.46712035853072e-16	0	M	Tgfbi
Snhg201	0.00280423	0.278153	0.208	0.295	1	0	M	Snhg20
Ncl1	0.000599601	0.278124	0.782	0.655	1	0	M	Ncl
Srsf32	0.000267192	0.274925	0.72	0.598	1	0	M	Srsf3
Rab5c2	0.00104754	0.272461	0.69	0.595	1	0	M	Rab5c
Banf12	0.00235054	0.268336	0.732	0.626	1	0	M	Banf1
Cct71	0.00424456	0.267265	0.766	0.651	1	0	M	Cct7
Rab1b1	0.000210086	0.267175	0.742	0.613	1	0	M	Rab1b
Pitpna4	8.61027390602831e-06	0.265459	0.758	0.592	0.136292	0	M	Pitpna
Atp6v0c4	1.1721677644753e-14	0.265121	0.937	0.917	1.85542435438796e-10	0	M	Atp6v0c
Lsm72	0.00891055	0.263091	0.79	0.672	1	0	M	Lsm7
Snx52	2.64089726816547e-05	0.261998	0.734	0.598	0.418028	0	M	Snx5
H2-D13	1.13848314000391e-07	0.2605	0.993	0.982	0.00180211	0	M	H2-D1
Nedd82	0.00700952	0.260168	0.899	0.899	1	0	M	Nedd8
Ppp2r1a2	0.00077447	0.258472	0.67	0.57	1	0	M	Ppp2r1a
Capzb3	5.94706583478681e-05	0.257803	0.823	0.686	0.941361	0	M	Capzb
Napa1	0.00139848	0.255747	0.657	0.57	1	0	M	Napa
Serpinb6a2	0.00011597	0.255191	0.642	0.523	1	0	M	Serpinb6a
Id31	0.00791225	0.251729	0.869	0.888	1	0	M	Id3
Ogdh	0.0057304	0.250141	0.701	0.6	1	0	M	Ogdh
Irf72	0.0029283	0.250079	0.732	0.631	1	0	M	Irf7
Rgs51	6.40736375771745e-06	0.249669	0.177	0.293	0.101422	0	M	Rgs5
Dctn21	0.00293493	0.249364	0.773	0.652	1	0	M	Dctn2
Erp292	0.000898038	0.248497	0.797	0.66	1	0	M	Erp29
Spi13	2.94147471976868e-06	0.247211	0.594	0.472	0.0465606	0	M	Spi1
Tspan41	0.00275457	0.245223	0.683	0.582	1	0	M	Tspan4
Papola1	0.00365744	0.245204	0.69	0.597	1	0	M	Papola
Gabarap2	9.59714118754889e-06	0.243922	0.928	0.948	0.151913	0	M	Gabarap
Fcgr44	2.80101716579419e-06	0.243455	0.633	0.512	0.0443373	0	M	Fcgr4
P2rx41	0.000690448	0.242418	0.649	0.55	1	0	M	P2rx4
Cxcl163	7.12745203953838e-07	0.239866	0.598	0.466	0.011282	0	M	Cxcl16
Ddx461	0.000253526	0.23832	0.162	0.26	1	0	M	Ddx46
Atp13a22	0.00618182	0.236458	0.203	0.281	1	0	M	Atp13a2
Llph1	0.00299542	0.235294	0.714	0.601	1	0	M	Llph
Neat13	4.37323396361427e-05	0.231776	0.867	0.794	0.692239	0	M	Neat1
Snrpb3	0.00805043	0.228506	0.793	0.682	1	0	M	Snrpb
Lamp12	0.00798991	0.225051	0.876	0.944	1	0	M	Lamp1
Gngt22	6.37426349113607e-06	0.223186	0.867	0.715	0.100898	0	M	Gngt2
Oser11	0.00137455	0.220191	0.194	0.288	1	0	M	Oser1
Fam89b2	0.00651019	0.218745	0.186	0.257	1	0	M	Fam89b
Btg14	1.09697591275525e-07	0.218666	0.653	0.508	0.0017364	0	M	Btg1
Anxa53	0.00107012	0.21141	0.839	0.727	1	0	M	Anxa5
Anxa24	1.11386103381118e-10	0.211124	0.631	0.454	1.76313063041971e-06	0	M	Anxa2
Ptp4a23	0.00417825	0.211031	0.69	0.587	1	0	M	Ptp4a2
Hnrnpm2	0.00304045	0.210199	0.72	0.597	1	0	M	Hnrnpm
Leprot2	0.00269517	0.20815	0.255	0.355	1	0	M	Leprot
Psmc31	0.00755169	0.207416	0.771	0.645	1	0	M	Psmc3
S100a64	1.85725865408065e-29	0.200937	0.86	0.58	2.93985472354425e-25	0	M	S100a6
Ddost1	0.00745379	0.200487	0.799	0.671	1	0	M	Ddost
Ppp2r5c2	3.8011937548075e-06	0.198546	0.251	0.402	0.0601691	0	M	Ppp2r5c
Ncln1	0.000199614	0.195422	0.31	0.434	1	0	M	Ncln
Usp191	0.000453658	0.194463	0.262	0.374	1	0	M	Usp19
Psmb83	0.000119822	0.189828	0.808	0.673	1	0	M	Psmb8
H2-K12	0.000574639	0.184022	1	0.997	1	0	M	H2-K1
Sem13	0.00179695	0.180604	0.917	0.937	1	0	M	Sem1
Irf53	0.00912866	0.179673	0.247	0.339	1	0	M	Irf5
Srrm21	7.94189434579704e-05	0.17835	0.196	0.305	1	0	M	Srrm2
Tbc1d9b1	0.000336596	0.177201	0.183	0.277	1	0	M	Tbc1d9b
Gpi14	0.0030101	0.176743	0.863	0.761	1	0	M	Gpi1
Lcp14	1.65809101639785e-14	0.176116	0.799	0.571	2.62459226985615e-10	0	M	Lcp1
Arap12	0.00375863	0.175795	0.262	0.361	1	0	M	Arap1
Ostf14	0.000501849	0.172204	0.766	0.633	1	0	M	Ostf1
Ms4a6d4	0.00153931	0.170254	0.406	0.339	1	0	M	Ms4a6d
Ubac21	0.00451622	0.16873	0.194	0.273	1	0	M	Ubac2
Necap22	0.00169951	0.168655	0.188	0.271	1	0	M	Necap2
Sat13	0.00118939	0.167521	0.854	0.782	1	0	M	Sat1
Tnfaip24	5.70160451315041e-13	0.166658	0.699	0.51	9.02506978386578e-09	0	M	Tnfaip2
Fn12	0.00294639	0.165694	0.969	0.977	1	0	M	Fn1
Mta21	0.00439843	0.164809	0.181	0.258	1	0	M	Mta2
Sec11c1	0.0040573	0.163853	0.721	0.609	1	0	M	Sec11c
Rps3a12	0.0025933	0.161469	0.985	0.995	1	0	M	Rps3a1
Tuba1b3	0.00204755	0.159928	0.834	0.702	1	0	M	Tuba1b
Fth14	3.00077759773913e-34	0.156176	1	1	4.74993085946126e-30	0	M	Fth1
Capza23	0.00919164	0.153643	0.705	0.612	1	0	M	Capza2
Cotl13	0.000131931	0.1509	0.485	0.387	1	0	M	Cotl1
Nek91	0.00019332	0.150203	0.203	0.307	1	0	M	Nek9
Ahnak2	0.0088065	0.148594	0.255	0.335	1	0	M	Ahnak
Cttn1	0.00437752	0.148494	0.216	0.298	1	0	M	Cttn
Rbbp61	0.00842477	0.147487	0.227	0.31	1	0	M	Rbbp6
B4galt12	0.0031629	0.144185	0.221	0.308	1	0	M	B4galt1
Wac1	0.00100145	0.141844	0.229	0.331	1	0	M	Wac
Dgkz2	0.000298356	0.140276	0.162	0.256	1	0	M	Dgkz
Lrrc42	6.36553106237585e-06	0.136951	0.229	0.359	0.10076	0	M	Lrrc42
Pla2g74	1.94592386059193e-18	0.136833	0.664	0.424	3.08020287893096e-14	0	M	Pla2g7
Pea15a3	0.00244157	0.129752	0.245	0.343	1	0	M	Pea15a
Msn4	5.76826814266044e-06	0.129664	0.642	0.5	0.0913059	0	M	Msn
Arl6ip51	5.05973461141974e-05	0.123958	0.245	0.37	0.800905	0	M	Arl6ip5
Dbnl2	0.000235922	0.112442	0.271	0.392	1	0	M	Dbnl
Stxbp22	0.00109663	0.106455	0.197	0.286	1	0	M	Stxbp2
Cdc42se13	0.00253831	0.106104	0.225	0.311	1	0	M	Cdc42se1
Macf11	0.000559087	0.10181	0.26	0.372	1	0	M	Macf1
Actr33	7.75184484027838e-06	0.100803	0.768	0.605	0.122704	0	M	Actr3
Spink11	1.99504026164071e-64	2.54092	0.281	0.062	3.15794923015107e-60	1	HEP1	Spink1
Gstm31	7.01829460610255e-58	2.13274	0.783	0.557	1.11092585319997e-53	1	HEP1	Gstm3
Ifi27l2b1	8.00203899937614e-63	1.74408	0.533	0.213	1.26664275321125e-58	1	HEP1	Ifi27l2b
Klk1b4	6.53953295215661e-40	1.73944	0.258	0.075	1.03514267099687e-35	1	HEP1	Klk1b4
Vnn31	8.4752891183733e-75	1.43208	0.865	0.615	1.34155351454731e-70	1	HEP1	Vnn3
Cib31	2.97704375295645e-38	1.40027	0.49	0.248	4.71236255655476e-34	1	HEP1	Cib3
Cdh11	1.35177564988624e-24	1.17828	0.344	0.161	2.13972567620494e-20	1	HEP1	Cdh1
Frzb2	2.32745069078172e-23	1.17504	0.254	0.101	3.68412169843838e-19	1	HEP1	Frzb
Spon21	2.51951668912062e-23	1.17103	0.324	0.15	3.98814296720903e-19	1	HEP1	Spon2
Snta11	2.94065772493413e-26	1.11861	0.406	0.2	4.65476711279824e-22	1	HEP1	Snta1
Wfdc23	6.55896877942686e-25	1.11291	0.336	0.152	1.03821916809548e-20	1	HEP1	Wfdc2
Gstm21	2.04614194437351e-29	1.08904	0.752	0.617	3.23883808374882e-25	1	HEP1	Gstm2
Spic	2.60307179964507e-20	1.07443	0.268	0.118	4.12040235165818e-16	1	HEP1	Spic
Tmem2682	2.04433278894937e-28	1.07119	0.439	0.218	3.23597437162796e-24	1	HEP1	Tmem268
Tstd11	1.64892497120391e-20	1.02653	0.504	0.333	2.61008333691867e-16	1	HEP1	Tstd1
Prelp2	4.18074014732194e-33	0.987666	0.725	0.533	6.6176935791959e-29	1	HEP1	Prelp
Slc39a41	3.49287722600988e-22	0.975322	0.5	0.314	5.52887536105104e-18	1	HEP1	Slc39a4
Mki672	2.31773334168524e-19	0.96853	0.293	0.137	3.66874010655357e-15	1	HEP1	Mki67
Cdk12	1.70340741492918e-16	0.960007	0.326	0.174	2.69632359709139e-12	1	HEP1	Cdk1
Mcm52	5.2602348890225e-14	0.958034	0.268	0.141	8.32642580583372e-10	1	HEP1	Mcm5
Gstm11	2.22978705842377e-31	0.954487	0.955	0.948	3.52952993477899e-27	1	HEP1	Gstm1
Spp14	4.51415253083463e-05	0.945379	0.693	0.64	0.714545	1	HEP1	Spp1
Eif2s3y1	1.7486377974699e-17	0.901538	0.254	0.115	2.76791876961511e-13	1	HEP1	Eif2s3y
Cyb5611	4.35584954571935e-17	0.893777	0.332	0.174	6.89487424591916e-13	1	HEP1	Cyb561
Gm49980	2.11138125440435e-38	0.885524	0.662	0.451	3.34210538759665e-34	1	HEP1	Gm49980
Wdr62	3.71627495060911e-12	0.883319	0.252	0.135	5.88249161931916e-08	1	HEP1	Wdr6
Adgre4	3.15863028296399e-19	0.873321	0.387	0.206	4.9997958749037e-15	1	HEP1	Adgre4
Dmpk1	6.82000441180239e-19	0.872876	0.404	0.224	1.0795384983442e-14	1	HEP1	Dmpk
Nudt191	2.80395275838152e-18	0.865862	0.576	0.431	4.43837682124211e-14	1	HEP1	Nudt19
Mfge82	1.70300629546249e-17	0.858358	0.533	0.381	2.69568866508757e-13	1	HEP1	Mfge8
2010003K11Rik1	9.73857717788828e-14	0.852006	0.281	0.148	1.54151938148794e-09	1	HEP1	2010003K11Rik
Serpina123	8.86308070072577e-21	0.83822	0.602	0.397	1.40293704411788e-16	1	HEP1	Serpina12
Nmrk11	1.14471393228496e-14	0.82998	0.328	0.181	1.81196768341386e-10	1	HEP1	Nmrk1
C61	6.76891683121165e-25	0.811019	0.674	0.479	1.07145184521249e-20	1	HEP1	C6
Krt81	2.28648507718923e-29	0.795633	0.832	0.72	3.61927722868283e-25	1	HEP1	Krt8
Cdhr51	4.1181102461671e-15	0.781884	0.387	0.228	6.5185567086579e-11	1	HEP1	Cdhr5
Cblc1	4.61406599722379e-11	0.781662	0.283	0.163	7.30360506700554e-07	1	HEP1	Cblc
Ube2c2	7.51051339636783e-11	0.773255	0.305	0.185	1.18883916551106e-06	1	HEP1	Ube2c
Clca3a12	3.97072166692108e-14	0.761759	0.299	0.161	6.28525532656938e-10	1	HEP1	Clca3a1
Fgfr21	4.93160866727643e-13	0.758921	0.326	0.188	7.80624335943186e-09	1	HEP1	Fgfr2
Birc52	7.69332778530993e-13	0.751527	0.283	0.153	1.21777685513671e-08	1	HEP1	Birc5
Mcm62	2.72360755691279e-11	0.750332	0.324	0.196	4.31119840183725e-07	1	HEP1	Mcm6
Id12	1.09908018471115e-15	0.743673	0.441	0.271	1.73973402437927e-11	1	HEP1	Id1
Fgfr41	2.60242673738994e-09	0.73189	0.287	0.177	4.11938128261454e-05	1	HEP1	Fgfr4
Rasgef1b1	1.74270645233354e-10	0.730426	0.279	0.163	2.75853004339877e-06	1	HEP1	Rasgef1b
Tcim1	6.58950546125235e-08	0.728253	0.283	0.185	0.00104305	1	HEP1	Tcim
Tmem1411	1.62161682597421e-14	0.722294	0.434	0.273	2.56685727383457e-10	1	HEP1	Tmem141
Ggt61	6.18032917476211e-11	0.72046	0.322	0.196	9.78284305073094e-07	1	HEP1	Ggt6
Cp1	9.6664792130099e-38	0.713359	0.996	0.951	1.53010699462734e-33	1	HEP1	Cp
Sema6d	1.79163815719103e-09	0.713226	0.252	0.146	2.83598403901768e-05	1	HEP1	Sema6d
Ptges22	4.77645755036225e-12	0.707722	0.385	0.244	7.56065465646841e-08	1	HEP1	Ptges2
Hsd17b132	2.48219202801756e-16	0.70621	0.811	0.729	3.92906176114899e-12	1	HEP1	Hsd17b13
Lcn23	2.53822711420212e-47	0.704933	1	0.927	4.01775969907053e-43	1	HEP1	Lcn2
Ablim11	2.86027311263493e-10	0.703688	0.273	0.158	4.52752630998983e-06	1	HEP1	Ablim1
Nr0b21	1.19043550509462e-08	0.702372	0.434	0.328	0.000188434	1	HEP1	Nr0b2
Gstp32	2.42888795049688e-08	0.696408	0.314	0.208	0.000384469	1	HEP1	Gstp3
Orm21	3.55258838998008e-44	0.694727	0.998	0.906	5.62339216249947e-40	1	HEP1	Orm2
Mustn11	1.8299380221613e-14	0.693451	0.398	0.235	2.89660889527912e-10	1	HEP1	Mustn1
Lrrc422	2.83194229456008e-15	0.687105	0.504	0.329	4.48268145805914e-11	1	HEP1	Lrrc42
Osgin11	4.72105577128968e-29	0.685864	0.867	0.788	7.47295918037444e-25	1	HEP1	Osgin1
Nudt181	1.65493997855275e-09	0.684206	0.293	0.179	2.61960449205114e-05	1	HEP1	Nudt18
Fgd22	5.87811939685095e-12	0.680086	0.295	0.165	9.30447519327537e-08	1	HEP1	Fgd2
Cep852	1.17542906229093e-10	0.671854	0.375	0.243	1.86058666270031e-06	1	HEP1	Cep85
Rcan12	1.17479717657908e-12	0.664999	0.408	0.257	1.85958645080702e-08	1	HEP1	Rcan1
Nostrin1	4.07899116804641e-12	0.664958	0.381	0.237	6.45663511990066e-08	1	HEP1	Nostrin
Abcb81	1.45439953818756e-07	0.663635	0.256	0.162	0.00230217	1	HEP1	Abcb8
Mug21	6.03281929336013e-30	0.662009	0.936	0.893	9.54934965945976e-26	1	HEP1	Mug2
St51	9.40659063753132e-10	0.65767	0.346	0.224	1.48896923201483e-05	1	HEP1	St5
Sdsl1	1.81852083854463e-10	0.655045	0.256	0.144	2.8785366353323e-06	1	HEP1	Sdsl
Chil15	1.42408327082004e-21	0.653257	0.414	0.211	2.25418140938104e-17	1	HEP1	Chil1
Fbxw91	1.57996700760946e-09	0.652834	0.367	0.241	2.50092977634502e-05	1	HEP1	Fbxw9
Lss1	4.48415082308572e-14	0.648459	0.428	0.267	7.09796233786238e-10	1	HEP1	Lss
Fam234b	7.90025840204162e-08	0.64468	0.285	0.185	0.00125053	1	HEP1	Fam234b
Ppip5k21	1.03520183076242e-06	0.642523	0.25	0.163	0.0163862	1	HEP1	Ppip5k2
Sorbs2	1.26552078206117e-07	0.63727	0.309	0.208	0.00200319	1	HEP1	Sorbs2
Atoh81	9.202096594365e-07	0.632758	0.264	0.175	0.014566	1	HEP1	Atoh8
Gm433051	2.03508281212402e-12	0.6255	0.316	0.187	3.22133258331112e-08	1	HEP1	Gm43305
Zfp9501	4.88485811271659e-07	0.61462	0.26	0.168	0.00773224	1	HEP1	Zfp950
Tmem512	4.23655528010382e-10	0.612407	0.324	0.199	6.70604335287633e-06	1	HEP1	Tmem51
Yipf21	1.03869189438977e-05	0.611407	0.262	0.182	0.164415	1	HEP1	Yipf2
Saa22	1.79734729262425e-58	0.609419	0.998	0.889	2.84502102949493e-54	1	HEP1	Saa2
Dock101	1.4918360786887e-10	0.605701	0.258	0.143	2.36142732895634e-06	1	HEP1	Dock10
Krt181	6.49232424167452e-25	0.603323	0.881	0.786	1.02767000421466e-20	1	HEP1	Krt18
Bpgm1	4.34475521066323e-07	0.602547	0.264	0.171	0.00687731	1	HEP1	Bpgm
Saa12	2.34247078293192e-53	0.598615	0.998	0.931	3.70789700230293e-49	1	HEP1	Saa1
Smim221	3.46323501374739e-08	0.597201	0.387	0.272	0.000548195	1	HEP1	Smim22
Srxn12	9.34537284362872e-10	0.597082	0.406	0.281	1.47927906741799e-05	1	HEP1	Srxn1
Lrat1	6.54955128965936e-06	0.59298	0.258	0.174	0.103673	1	HEP1	Lrat
Zfp638	6.32399802171017e-08	0.59263	0.26	0.16	0.00100103	1	HEP1	Zfp638
Top1mt	4.6888730521654e-07	0.590751	0.268	0.175	0.00742202	1	HEP1	Top1mt
Slc39a111	5.36343557393919e-07	0.589232	0.273	0.178	0.00848978	1	HEP1	Slc39a11
Lrg12	1.0878029197404e-42	0.588114	0.996	0.95	1.72188324165707e-38	1	HEP1	Lrg1
0610040J01Rik1	3.67093518192348e-07	0.587449	0.301	0.204	0.00581072	1	HEP1	0610040J01Rik
Npdc12	3.49834069633416e-09	0.581636	0.307	0.191	5.53752348822734e-05	1	HEP1	Npdc1
Tmem81	1.97635474766078e-06	0.577255	0.254	0.167	0.0312837	1	HEP1	Tmem8
Rgs24	1.28545344747534e-11	0.576788	0.369	0.226	2.03474426200872e-07	1	HEP1	Rgs2
Rcsd12	3.41792952298675e-08	0.572415	0.262	0.161	0.000541024	1	HEP1	Rcsd1
Stmn13	9.82974967249104e-11	0.571307	0.434	0.296	1.55595107565861e-06	1	HEP1	Stmn1
Lrp61	4.63176585237572e-08	0.569871	0.332	0.223	0.000733162	1	HEP1	Lrp6
Ppif1	6.13323549225316e-07	0.563822	0.318	0.218	0.0097083	1	HEP1	Ppif
Nln1	1.43356145381326e-06	0.563713	0.25	0.162	0.0226918	1	HEP1	Nln
Tns21	2.03572910871963e-06	0.560835	0.264	0.175	0.0322236	1	HEP1	Tns2
Gsta41	2.80955613935288e-09	0.559818	0.547	0.447	4.44724641298167e-05	1	HEP1	Gsta4
Cxadr1	3.10862612346978e-10	0.558497	0.566	0.448	4.92064429084032e-06	1	HEP1	Cxadr
Man1b11	1.36892880171749e-06	0.554845	0.27	0.179	0.0216688	1	HEP1	Man1b1
Plxnb1	5.29444943302369e-08	0.55344	0.355	0.242	0.000838058	1	HEP1	Plxnb1
Tmem161a2	2.93280943768209e-06	0.551369	0.25	0.164	0.0464234	1	HEP1	Tmem161a
Sepsecs	2.86167795282219e-06	0.550887	0.262	0.174	0.0452975	1	HEP1	Sepsecs
Slc4a42	3.09159991746067e-06	0.550425	0.314	0.223	0.0489369	1	HEP1	Slc4a4
Ascc22	3.88881739834706e-07	0.548476	0.277	0.18	0.00615561	1	HEP1	Ascc2
Cystm11	1.45608439695123e-06	0.545157	0.264	0.174	0.0230484	1	HEP1	Cystm1
Tm9sf42	1.43842734687437e-08	0.536344	0.428	0.301	0.000227689	1	HEP1	Tm9sf4
Trf1	9.16528471771581e-37	0.531241	1	1	1.45077291796723e-32	1	HEP1	Trf
Rassf31	2.08863634152194e-07	0.53025	0.326	0.22	0.0033061	1	HEP1	Rassf3
Cryzl21	2.92832815254259e-05	0.529036	0.256	0.179	0.463525	1	HEP1	Cryzl2
Colec101	2.80425938761512e-06	0.527604	0.258	0.171	0.0443886	1	HEP1	Colec10
Mov101	6.81657125707005e-06	0.526182	0.279	0.192	0.1079	1	HEP1	Mov10
Pkp21	3.64331706797603e-06	0.524926	0.27	0.181	0.0576701	1	HEP1	Pkp2
Ptgs12	1.94855825201568e-07	0.521103	0.371	0.26	0.00308437	1	HEP1	Ptgs1
Atg16l21	2.56976867682042e-06	0.519894	0.25	0.164	0.0406769	1	HEP1	Atg16l2
Clu2	1.28100746302118e-35	0.516653	1	0.994	2.02770671321623e-31	1	HEP1	Clu
Mdm42	6.50829477641319e-06	0.516458	0.26	0.177	0.10302	1	HEP1	Mdm4
Atp9a1	1.90984239352856e-08	0.512582	0.365	0.243	0.000302309	1	HEP1	Atp9a
Tbrg4	6.666597022912e-06	0.509271	0.25	0.166	0.105526	1	HEP1	Tbrg4
Atp1b11	9.56987090360986e-06	0.508384	0.443	0.364	0.151481	1	HEP1	Atp1b1
Nr1i21	6.40934031254182e-07	0.507237	0.326	0.222	0.0101453	1	HEP1	Nr1i2
Gdap21	2.39623641582788e-06	0.506912	0.295	0.202	0.03793	1	HEP1	Gdap2
Srd5a11	4.02450997335469e-05	0.506276	0.402	0.328	0.63704	1	HEP1	Srd5a1
Gm51503	5.61438030716865e-07	0.506097	0.27	0.174	0.008887	1	HEP1	Gm5150
Aldh1b11	0.00130737	0.505667	0.533	0.501	1	1	HEP1	Aldh1b1
Scd11	1.39719193465043e-30	0.503731	1	0.969	2.21161511335816e-26	1	HEP1	Scd1
Rnf1691	1.87232955897644e-05	0.501857	0.295	0.211	0.296371	1	HEP1	Rnf169
Mcm72	2.9063468222345e-07	0.500491	0.309	0.205	0.00460046	1	HEP1	Mcm7
Stxbp32	1.9490473998921e-06	0.500133	0.328	0.231	0.0308515	1	HEP1	Stxbp3
Usp241	2.39631910237012e-05	0.496632	0.281	0.198	0.379313	1	HEP1	Usp24
Nudt11	1.33405526181614e-05	0.494748	0.281	0.196	0.211168	1	HEP1	Nudt1
Ociad21	0.00040321	0.493682	0.262	0.195	1	1	HEP1	Ociad2
Pex11a2	1.9651631888704e-06	0.492537	0.283	0.189	0.0311066	1	HEP1	Pex11a
Vars2	1.1986490724058e-07	0.490574	0.387	0.273	0.00189734	1	HEP1	Vars
Dhx92	2.40871214165751e-06	0.489897	0.295	0.202	0.0381275	1	HEP1	Dhx9
A2ml11	1.98338358427028e-08	0.489129	0.609	0.506	0.00031395	1	HEP1	A2ml1
2310030G06Rik1	2.74407319835655e-05	0.487248	0.258	0.179	0.434359	1	HEP1	2310030G06Rik
St6gal12	5.48428934036347e-13	0.487062	0.619	0.474	8.68108159686133e-09	1	HEP1	St6gal1
Vegfb1	1.13150632466667e-06	0.483501	0.283	0.187	0.0179106	1	HEP1	Vegfb
Cdc42ep12	1.59950842132617e-05	0.482516	0.26	0.179	0.253186	1	HEP1	Cdc42ep1
Alcam1	1.36337272806967e-05	0.482371	0.389	0.299	0.215808	1	HEP1	Alcam
Dpp72	7.75869791512399e-08	0.481439	0.375	0.26	0.00122812	1	HEP1	Dpp7
Rdh91	3.94020904631617e-10	0.480631	0.52	0.383	6.23695689941387e-06	1	HEP1	Rdh9
Gstp11	7.78015202879816e-08	0.479811	0.402	0.284	0.00123152	1	HEP1	Gstp1
Chd92	1.44432517243813e-05	0.478117	0.254	0.172	0.228622	1	HEP1	Chd9
Elovl61	1.46052008552506e-06	0.478075	0.33	0.231	0.0231186	1	HEP1	Elovl6
Fars21	7.24192831010327e-08	0.473661	0.373	0.253	0.00114632	1	HEP1	Fars2
Hmgcs11	1.75874237761752e-17	0.470955	0.877	0.807	2.78391330953078e-13	1	HEP1	Hmgcs1
Acat21	1.76091161575095e-06	0.46908	0.514	0.419	0.0278735	1	HEP1	Acat2
Rnf1211	1.37216762886078e-05	0.468523	0.32	0.23	0.2172	1	HEP1	Rnf121
Adpgk2	3.53580279127217e-06	0.467895	0.283	0.193	0.0559682	1	HEP1	Adpgk
Actl6a2	4.66943285871072e-05	0.467177	0.268	0.19	0.739125	1	HEP1	Actl6a
Crybb32	1.02957256891329e-11	0.466249	0.279	0.15	1.62971041933285e-07	1	HEP1	Crybb3
Fcna1	5.58474534543103e-12	0.465895	0.75	0.661	8.84009340728277e-08	1	HEP1	Fcna
Slc17a41	3.33396607114101e-05	0.463425	0.254	0.175	0.527733	1	HEP1	Slc17a4
Tubb4b1	9.49683336916393e-09	0.463258	0.787	0.76	0.000150325	1	HEP1	Tubb4b
Kctd21	4.83202899352095e-05	0.461931	0.262	0.185	0.764862	1	HEP1	Kctd2
B4gat11	0.000277171	0.460367	0.275	0.204	1	1	HEP1	B4gat1
Fmo11	9.89246636550409e-15	0.459679	0.873	0.75	1.56587850099564e-10	1	HEP1	Fmo1
Ctr91	3.63213107178625e-07	0.459124	0.285	0.183	0.0057493	1	HEP1	Ctr9
Baiap21	8.44010017894213e-07	0.459124	0.373	0.265	0.0133598	1	HEP1	Baiap2
Slc35a1	8.74382716515927e-05	0.455216	0.275	0.197	1	1	HEP1	Slc35a1
Gss1	5.87212861497235e-06	0.455138	0.502	0.425	0.0929499	1	HEP1	Gss
C130074G19Rik2	1.21412088075693e-06	0.454746	0.416	0.308	0.0192183	1	HEP1	C130074G19Rik
Wdr831	0.000214675	0.45304	0.281	0.208	1	1	HEP1	Wdr83
Pacsin31	5.62511910645913e-06	0.45184	0.373	0.273	0.08904	1	HEP1	Pacsin3
Trmt1l1	0.000151892	0.451319	0.266	0.194	1	1	HEP1	Trmt1l
Miip1	5.94419939940756e-06	0.446029	0.254	0.168	0.0940907	1	HEP1	Miip
Spryd41	0.000216471	0.444174	0.301	0.228	1	1	HEP1	Spryd4
Ces2e2	2.93022752397619e-05	0.44003	0.627	0.579	0.463826	1	HEP1	Ces2e
Fasn1	1.58973457833759e-18	0.439812	0.918	0.842	2.51639086405056e-14	1	HEP1	Fasn
Slc30a101	7.89343567269727e-06	0.439536	0.338	0.244	0.124945	1	HEP1	Slc30a10
Pkp4	2.48869482596113e-06	0.438892	0.391	0.287	0.0393935	1	HEP1	Pkp4
Siglece2	1.79961870831071e-08	0.438215	0.252	0.148	0.000284862	1	HEP1	Siglece
CAAA01118383.12	0.000156532	0.438171	0.277	0.203	1	1	HEP1	CAAA01118383.1
Slc11a23	6.95020926452035e-08	0.437661	0.432	0.312	0.00110015	1	HEP1	Slc11a2
Slc35d22	7.61898666498731e-05	0.437591	0.314	0.233	1	1	HEP1	Slc35d2
Rpap31	2.43164552040568e-07	0.436701	0.352	0.241	0.00384905	1	HEP1	Rpap3
Lpin13	6.51081930467771e-07	0.435278	0.316	0.211	0.010306	1	HEP1	Lpin1
Bag32	2.44947091530561e-05	0.435079	0.311	0.226	0.387727	1	HEP1	Bag3
Sgf291	8.03294975484859e-06	0.433412	0.266	0.178	0.127154	1	HEP1	Sgf29
Stx181	4.01411088984195e-05	0.431061	0.279	0.197	0.635394	1	HEP1	Stx18
Orm12	7.05611535883848e-33	0.430768	1	0.987	1.11691250015054e-28	1	HEP1	Orm1
Acsf31	4.05929889834459e-05	0.430743	0.268	0.188	0.642546	1	HEP1	Acsf3
Apip1	4.49714737205568e-05	0.429418	0.328	0.244	0.711853	1	HEP1	Apip
Cd5l1	6.13967298031663e-15	0.429318	0.902	0.825	9.71848836054319e-11	1	HEP1	Cd5l
Cd1631	2.40835509422447e-05	0.429275	0.26	0.179	0.381219	1	HEP1	Cd163
C21	3.42403396526977e-07	0.429067	0.686	0.63	0.0054199	1	HEP1	C2
Mal22	0.00050155	0.429054	0.258	0.191	1	1	HEP1	Mal2
Bckdhb1	4.64008064009583e-07	0.428831	0.697	0.617	0.00734478	1	HEP1	Bckdhb
Ctps22	0.000120507	0.42652	0.256	0.182	1	1	HEP1	Ctps2
Tmem106c1	4.07162002150398e-06	0.425637	0.27	0.18	0.0644497	1	HEP1	Tmem106c
Cyp2d92	1.93378027251484e-18	0.424889	0.762	0.561	3.06098079336373e-14	1	HEP1	Cyp2d9
Usp50	0.000345466	0.424308	0.301	0.231	1	1	HEP1	Usp50
Usp101	7.96802091463975e-05	0.423719	0.301	0.222	1	1	HEP1	Usp10
Spryd71	4.09682606017608e-05	0.423412	0.35	0.265	0.648487	1	HEP1	Spryd7
Clec1b1	1.27024770631187e-05	0.423314	0.41	0.315	0.201068	1	HEP1	Clec1b
Hp2	2.00969960101977e-34	0.421131	1	0.999	3.1811534984542e-30	1	HEP1	Hp
Rogdi1	9.82184560624079e-05	0.420683	0.275	0.199	1	1	HEP1	Rogdi
Lrrc31	0.00525966	0.419932	0.26	0.207	1	1	HEP1	Lrrc3
Gstm61	2.86008038596812e-07	0.419805	0.619	0.545	0.00452722	1	HEP1	Gstm6
Ces2c1	2.07341076162648e-08	0.418482	0.273	0.165	0.0003282	1	HEP1	Ces2c
Sds1	0.000407394	0.41743	0.686	0.679	1	1	HEP1	Sds
Fez22	9.07367875572439e-06	0.415732	0.4	0.299	0.143627	1	HEP1	Fez2
Mkrn2os1	0.000140028	0.415535	0.27	0.196	1	1	HEP1	Mkrn2os
Arhgap172	1.64429288461126e-05	0.413277	0.262	0.179	0.260275	1	HEP1	Arhgap17
Cgnl11	3.21029008174651e-05	0.412965	0.264	0.182	0.508157	1	HEP1	Cgnl1
Tomm40l1	2.21901083314222e-05	0.409775	0.27	0.188	0.351247	1	HEP1	Tomm40l
Rhou2	6.83883791126216e-06	0.408598	0.564	0.487	0.108252	1	HEP1	Rhou
Farp12	1.05259093131084e-05	0.408498	0.281	0.193	0.166615	1	HEP1	Farp1
Gpr1821	3.2147503643368e-07	0.408087	0.383	0.268	0.00508863	1	HEP1	Gpr182
Net12	4.97301802431051e-05	0.406923	0.342	0.255	0.787179	1	HEP1	Net1
1300002E11Rik1	0.000217096	0.406337	0.275	0.201	1	1	HEP1	1300002E11Rik
Slc22a231	0.000110389	0.404721	0.289	0.209	1	1	HEP1	Slc22a23
Arhgef191	5.86923871381273e-05	0.402363	0.301	0.218	0.929042	1	HEP1	Arhgef19
Aldh1a72	1.71659544601661e-09	0.40154	0.75	0.68	2.71719893149969e-05	1	HEP1	Aldh1a7
Dsp1	0.000110462	0.400865	0.275	0.197	1	1	HEP1	Dsp
Myo7a2	5.73620262957773e-06	0.399746	0.258	0.17	0.0907984	1	HEP1	Myo7a
Srpk12	0.00014216	0.399418	0.25	0.176	1	1	HEP1	Srpk1
Spint21	1.20894669886451e-06	0.397793	0.67	0.615	0.0191364	1	HEP1	Spint2
Cd2ap1	0.00013773	0.396991	0.328	0.248	1	1	HEP1	Cd2ap
Steap43	3.09726442121901e-25	0.396586	0.939	0.813	4.90265985234757e-21	1	HEP1	Steap4
Rad51b1	0.00197152	0.39394	0.256	0.195	1	1	HEP1	Rad51b
Xylb1	0.000423278	0.393784	0.301	0.228	1	1	HEP1	Xylb
Dnm1l	5.96427556964945e-06	0.393437	0.314	0.219	0.0944085	1	HEP1	Dnm1l
Bsdc12	0.00165584	0.393104	0.287	0.224	1	1	HEP1	Bsdc1
Vps162	0.000154854	0.392445	0.256	0.183	1	1	HEP1	Vps16
Def81	0.000173765	0.391067	0.252	0.18	1	1	HEP1	Def8
Tubb2a1	3.62091051898925e-10	0.389901	0.775	0.705	5.73153926050809e-06	1	HEP1	Tubb2a
Aqp81	1.09718108066095e-06	0.389707	0.578	0.478	0.0173673	1	HEP1	Aqp8
Gimap91	6.41349778544058e-05	0.387831	0.262	0.184	1	1	HEP1	Gimap9
Acaca1	2.77763236307573e-05	0.387786	0.344	0.255	0.439671	1	HEP1	Acaca
Ptcd21	6.74585990184405e-05	0.387334	0.342	0.256	1	1	HEP1	Ptcd2
Fads61	0.000358647	0.387334	0.266	0.195	1	1	HEP1	Fads6
Anapc152	1.15318536532466e-05	0.386145	0.344	0.248	0.182538	1	HEP1	Anapc15
Umps1	0.00156441	0.385291	0.287	0.225	1	1	HEP1	Umps
Stap23	8.54998821320229e-07	0.385051	0.414	0.306	0.0135338	1	HEP1	Stap2
Stbd11	3.26640087948553e-05	0.383345	0.385	0.294	0.517039	1	HEP1	Stbd1
Vav21	0.000243656	0.382787	0.275	0.202	1	1	HEP1	Vav2
Cpsf11	0.00046135	0.38255	0.262	0.193	1	1	HEP1	Cpsf1
Ero1lb2	6.075130273312e-07	0.38176	0.457	0.339	0.00961632	1	HEP1	Ero1lb
Dexi1	0.000154036	0.381472	0.27	0.194	1	1	HEP1	Dexi
Mindy31	0.00222886	0.380422	0.295	0.234	1	1	HEP1	Mindy3
Leo11	0.000149	0.379439	0.268	0.195	1	1	HEP1	Leo1
Pop42	8.48919438908885e-05	0.37853	0.303	0.221	1	1	HEP1	Pop4
Smc1a1	5.57941692780269e-05	0.377386	0.303	0.219	0.883166	1	HEP1	Smc1a
Gpaa13	8.91333608355192e-06	0.377076	0.299	0.205	0.141089	1	HEP1	Gpaa1
Rab4a1	0.000227669	0.37515	0.293	0.217	1	1	HEP1	Rab4a
Ubd3	2.5610763669167e-21	0.374308	0.338	0.156	4.05392778119245e-17	1	HEP1	Ubd
Chdh1	0.000362674	0.371972	0.348	0.274	1	1	HEP1	Chdh
Abca21	0.000149712	0.370897	0.346	0.26	1	1	HEP1	Abca2
Bok2	6.29883118245249e-05	0.368436	0.352	0.265	0.997042	1	HEP1	Bok
Enpp21	0.000710805	0.368359	0.273	0.206	1	1	HEP1	Enpp2
Cfb3	1.72573545284047e-17	0.368023	0.982	0.971	2.73166664830118e-13	1	HEP1	Cfb
Cutal1	6.33246704113769e-06	0.367006	0.373	0.27	0.100237	1	HEP1	Cutal
Polr1c2	0.00121024	0.36593	0.258	0.194	1	1	HEP1	Polr1c
Nr2c2ap2	0.000175777	0.36583	0.252	0.179	1	1	HEP1	Nr2c2ap
Tlk11	0.000180126	0.365043	0.277	0.201	1	1	HEP1	Tlk1
Ccnd12	0.000105714	0.36481	0.324	0.24	1	1	HEP1	Ccnd1
Hjurp2	1.3962100803897e-05	0.364504	0.512	0.419	0.221006	1	HEP1	Hjurp
Mapre31	0.000357808	0.364455	0.32	0.244	1	1	HEP1	Mapre3
Timd41	5.13314048497648e-05	0.364341	0.336	0.25	0.812525	1	HEP1	Timd4
Traf22	7.3372533178073e-05	0.362909	0.258	0.18	1	1	HEP1	Traf2
Smarca21	0.000673631	0.362724	0.332	0.261	1	1	HEP1	Smarca2
Erlin11	0.000536438	0.362506	0.283	0.213	1	1	HEP1	Erlin1
Nck13	3.466665217096e-06	0.361854	0.307	0.209	0.0548738	1	HEP1	Nck1
Nsdhl1	5.69285326742257e-05	0.361371	0.426	0.329	0.901122	1	HEP1	Nsdhl
Itih31	4.07082257260958e-17	0.361092	0.99	0.938	6.4437050501837e-13	1	HEP1	Itih3
Abcc21	1.01081327950233e-05	0.360963	0.621	0.532	0.160002	1	HEP1	Abcc2
Plpp21	0.00111208	0.360505	0.318	0.249	1	1	HEP1	Plpp2
Pigq2	0.000261477	0.359589	0.305	0.23	1	1	HEP1	Pigq
Inhbc2	6.93640108863537e-05	0.35882	0.373	0.284	1	1	HEP1	Inhbc
Aplp21	2.18761996167135e-07	0.3571	0.803	0.774	0.00346278	1	HEP1	Aplp2
Hcfc12	9.43224471994665e-05	0.356882	0.27	0.192	1	1	HEP1	Hcfc1
Cenpa2	7.59086057218126e-05	0.356243	0.291	0.21	1	1	HEP1	Cenpa
Orm31	5.84492409149053e-14	0.355142	0.686	0.523	9.25193034442037e-10	1	HEP1	Orm3
Cxcl17	1.86324968321572e-15	0.351289	0.723	0.54	2.94933792356216e-11	1	HEP1	Cxcl1
Sptlc11	0.000837239	0.350765	0.285	0.216	1	1	HEP1	Sptlc1
Ppp1r16a1	0.000607028	0.350748	0.25	0.184	1	1	HEP1	Ppp1r16a
Tnfaip8l11	2.9570050974533e-05	0.349161	0.324	0.231	0.468064	1	HEP1	Tnfaip8l1
Spg201	0.000100444	0.348657	0.273	0.194	1	1	HEP1	Spg20
Ube4b1	0.00176545	0.348377	0.299	0.233	1	1	HEP1	Ube4b
Folr21	0.00350032	0.34739	0.43	0.364	1	1	HEP1	Folr2
Gm472833	7.39540964226776e-08	0.347368	0.471	0.348	0.00117062	1	HEP1	Gm47283
Osbp1	0.0007725	0.346922	0.307	0.237	1	1	HEP1	Osbp
Gale1	3.31350409755198e-05	0.344705	0.301	0.214	0.524495	1	HEP1	Gale
Dhcr71	0.00163347	0.344211	0.574	0.527	1	1	HEP1	Dhcr7
Reln1	9.22560721781216e-05	0.342265	0.406	0.316	1	1	HEP1	Reln
Slc9a81	0.000319729	0.341805	0.291	0.218	1	1	HEP1	Slc9a8
Srek11	6.03722833692377e-07	0.339358	0.33	0.222	0.00955633	1	HEP1	Srek1
Abcg21	0.000871932	0.33814	0.34	0.269	1	1	HEP1	Abcg2
Nans3	0.000621759	0.337871	0.303	0.231	1	1	HEP1	Nans
Gapvd12	0.000212673	0.337252	0.262	0.188	1	1	HEP1	Gapvd1
Bin23	2.8254143796076e-07	0.336268	0.314	0.203	0.00447235	1	HEP1	Bin2
Coro72	0.00121739	0.335581	0.254	0.191	1	1	HEP1	Coro7
Dag12	6.23543653949352e-05	0.335474	0.4	0.307	0.987007	1	HEP1	Dag1
Clec4f1	1.57207716204772e-07	0.335393	0.801	0.707	0.00248844	1	HEP1	Clec4f
Abcg81	0.00105139	0.335192	0.285	0.216	1	1	HEP1	Abcg8
Clec4a33	6.65532372884102e-06	0.334979	0.305	0.209	0.105347	1	HEP1	Clec4a3
Rnf19a1	0.000165137	0.33477	0.26	0.185	1	1	HEP1	Rnf19a
Apex12	6.59131513257755e-05	0.33464	0.404	0.311	1	1	HEP1	Apex1
Cyp2j62	0.00388552	0.333815	0.338	0.279	1	1	HEP1	Cyp2j6
Rab171	0.00687154	0.333693	0.273	0.218	1	1	HEP1	Rab17
Shb1	0.00365996	0.333498	0.285	0.226	1	1	HEP1	Shb
Eif4g32	0.00025216	0.333405	0.299	0.223	1	1	HEP1	Eif4g3
Tmub22	0.00011889	0.333369	0.355	0.268	1	1	HEP1	Tmub2
Daglb2	0.000148158	0.332646	0.26	0.185	1	1	HEP1	Daglb
Fam20a	0.000464741	0.331989	0.334	0.257	1	1	HEP1	Fam20a
Slc35d11	0.000130663	0.331932	0.473	0.389	1	1	HEP1	Slc35d1
C92	0.00600728	0.331889	0.725	0.727	1	1	HEP1	C9
Sod33	5.58056101884528e-06	0.33112	0.643	0.578	0.0883347	1	HEP1	Sod3
Zkscan31	0.000576477	0.329331	0.291	0.22	1	1	HEP1	Zkscan3
Ern11	0.00465027	0.32831	0.25	0.194	1	1	HEP1	Ern1
Klhdc101	0.00860254	0.328301	0.252	0.201	1	1	HEP1	Klhdc10
Ctla2b3	1.3454451539656e-05	0.326447	0.299	0.206	0.212971	1	HEP1	Ctla2b
Adra1b1	0.000224466	0.321787	0.352	0.269	1	1	HEP1	Adra1b
Sharpin2	0.000124375	0.321621	0.416	0.324	1	1	HEP1	Sharpin
Pdzk11	0.00257479	0.321222	0.35	0.284	1	1	HEP1	Pdzk1
Fubp12	0.0011234	0.321115	0.305	0.237	1	1	HEP1	Fubp1
1110059E24Rik1	0.00380623	0.321115	0.254	0.195	1	1	HEP1	1110059E24Rik
C1ra1	5.69529562134536e-07	0.320834	0.838	0.77	0.00901508	1	HEP1	C1ra
Vps541	0.000241738	0.320309	0.281	0.204	1	1	HEP1	Vps54
Slc35e11	0.000424431	0.31965	0.268	0.197	1	1	HEP1	Slc35e1
Ldah1	0.00251384	0.319097	0.295	0.233	1	1	HEP1	Ldah
Atp6v0a12	0.000334374	0.317177	0.303	0.227	1	1	HEP1	Atp6v0a1
Lurap1l2	0.000111814	0.316599	0.35	0.263	1	1	HEP1	Lurap1l
Isyna12	9.58556710435989e-07	0.315226	0.539	0.414	0.015173	1	HEP1	Isyna1
Ddx561	0.00628828	0.313753	0.297	0.243	1	1	HEP1	Ddx56
Lztr12	0.00170849	0.313447	0.273	0.209	1	1	HEP1	Lztr1
Cacul11	0.0047781	0.313274	0.299	0.241	1	1	HEP1	Cacul1
Crebbp2	0.000874369	0.312888	0.266	0.199	1	1	HEP1	Crebbp
Lpar61	0.000159769	0.312047	0.332	0.248	1	1	HEP1	Lpar6
Inppl12	0.00473205	0.311249	0.283	0.226	1	1	HEP1	Inppl1
Usp52	0.00202416	0.310873	0.344	0.279	1	1	HEP1	Usp5
Slc35f51	1.70504348676783e-05	0.310449	0.422	0.322	0.269891	1	HEP1	Slc35f5
Anapc22	2.45112205097979e-05	0.309989	0.359	0.263	0.387988	1	HEP1	Anapc2
Vcam14	7.05499685448682e-09	0.309219	0.605	0.485	0.000111674	1	HEP1	Vcam1
Pole31	0.00137408	0.308267	0.27	0.205	1	1	HEP1	Pole3
Lsm22	0.000934251	0.307385	0.416	0.341	1	1	HEP1	Lsm2
Abcd12	0.000354203	0.307253	0.273	0.199	1	1	HEP1	Abcd1
G6pc1	0.00662941	0.307121	0.498	0.461	1	1	HEP1	G6pc
Asxl12	0.000410813	0.306974	0.25	0.18	1	1	HEP1	Asxl1
Dusp221	0.000576254	0.306072	0.273	0.202	1	1	HEP1	Dusp22
Arf64	0.000557922	0.30565	0.262	0.192	1	1	HEP1	Arf6
Mecr2	0.00798634	0.305567	0.262	0.209	1	1	HEP1	Mecr
Pkdcc3	0.000737238	0.30533	0.332	0.26	1	1	HEP1	Pkdcc
Armcx32	0.000246117	0.305141	0.27	0.195	1	1	HEP1	Armcx3
Vps26c2	0.00325883	0.305141	0.264	0.205	1	1	HEP1	Vps26c
Mvk1	0.00213444	0.305062	0.295	0.228	1	1	HEP1	Mvk
H2-Q101	1.9851730510937e-10	0.304475	0.992	0.982	3.14233042257622e-06	1	HEP1	H2-Q10
Srsf41	0.00176237	0.304199	0.27	0.206	1	1	HEP1	Srsf4
Akr1b33	1.18305427555839e-06	0.302728	0.406	0.289	0.0187266	1	HEP1	Akr1b3
Rchy12	0.000121165	0.300389	0.369	0.282	1	1	HEP1	Rchy1
Frmd4b1	0.0015488	0.299646	0.336	0.264	1	1	HEP1	Frmd4b
Myo18a2	0.00268004	0.299161	0.289	0.228	1	1	HEP1	Myo18a
Tysnd11	0.00246418	0.297885	0.363	0.298	1	1	HEP1	Tysnd1
Arhgap421	0.000800593	0.29748	0.273	0.203	1	1	HEP1	Arhgap42
Eps8l22	0.00224082	0.297111	0.35	0.283	1	1	HEP1	Eps8l2
F11r1	0.000471381	0.29673	0.586	0.526	1	1	HEP1	F11r
Pigr1	6.01904872700114e-09	0.296043	0.891	0.858	9.52755222997011e-05	1	HEP1	Pigr
Ly964	0.000890305	0.295582	0.293	0.222	1	1	HEP1	Ly96
Ciapin12	0.00363974	0.295458	0.275	0.218	1	1	HEP1	Ciapin1
Pcsk92	0.000188283	0.295183	0.475	0.391	1	1	HEP1	Pcsk9
Kras4	0.000288209	0.29518	0.291	0.213	1	1	HEP1	Kras
Dnajc223	0.00268735	0.294963	0.324	0.261	1	1	HEP1	Dnajc22
Ep4002	0.00607085	0.294494	0.258	0.204	1	1	HEP1	Ep400
Aacs1	0.00150765	0.294136	0.27	0.205	1	1	HEP1	Aacs
Atp13a12	0.000325123	0.293216	0.307	0.228	1	1	HEP1	Atp13a1
Ube2v21	0.00192541	0.292898	0.434	0.372	1	1	HEP1	Ube2v2
Psmg21	0.00508846	0.291491	0.27	0.213	1	1	HEP1	Psmg2
Sephs11	0.00440252	0.291226	0.254	0.198	1	1	HEP1	Sephs1
Bloc1s42	0.00994745	0.291087	0.275	0.224	1	1	HEP1	Bloc1s4
Cdadc11	0.00282293	0.290248	0.266	0.205	1	1	HEP1	Cdadc1
Agap32	0.00531179	0.28905	0.258	0.203	1	1	HEP1	Agap3
Selenbp11	0.000254083	0.288999	0.789	0.786	1	1	HEP1	Selenbp1
Ric8a2	0.00141124	0.28893	0.283	0.216	1	1	HEP1	Ric8a
Grb141	0.00310674	0.288917	0.279	0.216	1	1	HEP1	Grb14
Ormdl32	0.000916656	0.288388	0.414	0.339	1	1	HEP1	Ormdl3
Eif4enif12	0.00114924	0.28824	0.291	0.221	1	1	HEP1	Eif4enif1
Crip21	1.94154830273487e-05	0.287478	0.732	0.713	0.307328	1	HEP1	Crip2
Echdc12	0.00183684	0.28747	0.352	0.282	1	1	HEP1	Echdc1
Rnf1851	0.00168773	0.286926	0.262	0.199	1	1	HEP1	Rnf185
Washc22	0.0016119	0.286657	0.281	0.215	1	1	HEP1	Washc2
Skiv2l2	0.00759337	0.286657	0.352	0.296	1	1	HEP1	Skiv2l
Smoc11	0.00418481	0.286288	0.324	0.266	1	1	HEP1	Smoc1
Ppp1r101	0.00155539	0.286073	0.254	0.19	1	1	HEP1	Ppp1r10
Tuba1c3	4.39058538795534e-05	0.285826	0.779	0.774	0.694986	1	HEP1	Tuba1c
Qprt1	5.01780457465128e-05	0.285622	0.734	0.675	0.794268	1	HEP1	Qprt
Ifrd21	0.00240729	0.285476	0.291	0.228	1	1	HEP1	Ifrd2
Tmem176a1	9.19852238344592e-09	0.284585	0.924	0.904	0.000145603	1	HEP1	Tmem176a
Dhx161	0.000188198	0.28423	0.318	0.234	1	1	HEP1	Dhx16
Pla1a1	0.0018093	0.28412	0.469	0.409	1	1	HEP1	Pla1a
Ythdf11	0.000289403	0.284068	0.332	0.25	1	1	HEP1	Ythdf1
Gmps1	0.00333336	0.28333	0.303	0.239	1	1	HEP1	Gmps
Spr1	0.00300596	0.28162	0.709	0.709	1	1	HEP1	Spr
Ddx412	0.00330532	0.28149	0.273	0.212	1	1	HEP1	Ddx41
Plaa2	0.000141365	0.281439	0.357	0.267	1	1	HEP1	Plaa
Lacc13	1.94127144658341e-06	0.280482	0.361	0.251	0.0307284	1	HEP1	Lacc1
Pmf12	0.000433826	0.280347	0.322	0.243	1	1	HEP1	Pmf1
Rabep11	0.00209342	0.280329	0.279	0.213	1	1	HEP1	Rabep1
Gpc41	0.00131713	0.279871	0.359	0.285	1	1	HEP1	Gpc4
Marco2	1.53972438718526e-07	0.279832	0.805	0.764	0.00243723	1	HEP1	Marco
Micu22	0.000663544	0.279536	0.355	0.28	1	1	HEP1	Micu2
Tspan91	0.000827606	0.279418	0.295	0.223	1	1	HEP1	Tspan9
Chchd41	0.00127005	0.278853	0.287	0.218	1	1	HEP1	Chchd4
Depp11	0.000182429	0.2781	0.57	0.5	1	1	HEP1	Depp1
Txndc111	0.00134067	0.277667	0.303	0.234	1	1	HEP1	Txndc11
Mgam1	0.00029872	0.276614	0.385	0.299	1	1	HEP1	Mgam
Dhrs7b1	0.00536352	0.276596	0.279	0.22	1	1	HEP1	Dhrs7b
Casp72	0.0045397	0.276463	0.254	0.197	1	1	HEP1	Casp7
Mrps62	0.00221832	0.276243	0.402	0.333	1	1	HEP1	Mrps6
D230025D16Rik1	0.00104245	0.275092	0.342	0.266	1	1	HEP1	D230025D16Rik
Ccr24	3.87498125371343e-07	0.274843	0.285	0.181	0.00613371	1	HEP1	Ccr2
Il181	0.000735574	0.274481	0.359	0.283	1	1	HEP1	Il18
Itpr11	0.00263574	0.273258	0.277	0.214	1	1	HEP1	Itpr1
Ang2	1.49080472609863e-11	0.273072	0.996	0.937	2.35979480094153e-07	1	HEP1	Ang
Nectin22	0.00053008	0.272267	0.412	0.328	1	1	HEP1	Nectin2
Slc35a32	0.00675279	0.271583	0.297	0.238	1	1	HEP1	Slc35a3
Rnase41	1.2716258484378e-09	0.271521	0.998	0.973	2.0128565554922e-05	1	HEP1	Rnase4
Hpx3	6.22556434258495e-23	0.270493	1	0.999	9.85444579787771e-19	1	HEP1	Hpx
Pigs2	0.000300682	0.270384	0.316	0.236	1	1	HEP1	Pigs
Wdr772	0.00145089	0.270321	0.254	0.19	1	1	HEP1	Wdr77
Exosc71	0.000553099	0.26986	0.4	0.315	1	1	HEP1	Exosc7
Slc25a151	4.53418974684499e-05	0.269666	0.732	0.706	0.717717	1	HEP1	Slc25a15
Mfn11	0.00887047	0.269574	0.291	0.236	1	1	HEP1	Mfn1
4932438A13Rik	0.00760715	0.268721	0.275	0.219	1	1	HEP1	4932438A13Rik
Ngrn	0.00294535	0.267439	0.309	0.243	1	1	HEP1	Ngrn
Slc25a471	3.58241864914553e-05	0.267424	0.822	0.781	0.567061	1	HEP1	Slc25a47
Masp11	0.00115882	0.266834	0.588	0.535	1	1	HEP1	Masp1
C4bp2	7.28187379518191e-08	0.266088	0.918	0.888	0.00115265	1	HEP1	C4bp
Acsl42	0.00215585	0.265689	0.352	0.285	1	1	HEP1	Acsl4
Elp22	0.00256412	0.264227	0.275	0.212	1	1	HEP1	Elp2
Trp53inp1	0.00788735	0.264227	0.268	0.215	1	1	HEP1	Trp53inp1
Fmo51	1.454790824281e-05	0.264186	0.768	0.748	0.230279	1	HEP1	Fmo5
Trim26	0.00727095	0.263977	0.254	0.201	1	1	HEP1	Trim26
Hamp1	3.75195064628967e-06	0.26389	0.996	0.995	0.0593896	1	HEP1	Hamp
Timm222	0.000979084	0.263282	0.295	0.223	1	1	HEP1	Timm22
Slc40a11	3.6012012525434e-06	0.263271	0.697	0.644	0.0570034	1	HEP1	Slc40a1
Sf3a32	0.00345444	0.263243	0.287	0.225	1	1	HEP1	Sf3a3
Il1r14	0.000233889	0.263123	0.422	0.34	1	1	HEP1	Il1r1
Dym1	0.00377657	0.26262	0.258	0.199	1	1	HEP1	Dym
Ubxn81	0.00621786	0.261211	0.324	0.263	1	1	HEP1	Ubxn8
Atp9b2	0.000799192	0.259515	0.285	0.211	1	1	HEP1	Atp9b
Psmg31	0.00717169	0.259365	0.297	0.239	1	1	HEP1	Psmg3
Frrs11	0.00444393	0.259284	0.256	0.199	1	1	HEP1	Frrs1
Zmpste242	0.00071691	0.259205	0.412	0.33	1	1	HEP1	Zmpste24
Nedd4l1	0.00150114	0.258866	0.32	0.248	1	1	HEP1	Nedd4l
Smco41	0.00243955	0.258116	0.293	0.228	1	1	HEP1	Smco4
Brd44	0.00220137	0.258032	0.256	0.193	1	1	HEP1	Brd4
Sqle2	0.000529556	0.257429	0.529	0.446	1	1	HEP1	Sqle
Crat2	0.00805251	0.256835	0.32	0.263	1	1	HEP1	Crat
Asb81	0.00290228	0.256698	0.264	0.203	1	1	HEP1	Asb8
Ly6e3	3.53489485317798e-08	0.256645	0.982	0.964	0.000559539	1	HEP1	Ly6e
Srrt2	0.000500002	0.256587	0.352	0.271	1	1	HEP1	Srrt
Itga92	0.00122375	0.256022	0.311	0.241	1	1	HEP1	Itga9
Sae12	0.00976318	0.25591	0.279	0.224	1	1	HEP1	Sae1
Otulinl3	0.000108528	0.255841	0.264	0.184	1	1	HEP1	Otulinl
Frmd82	0.00064844	0.255554	0.268	0.196	1	1	HEP1	Frmd8
Brd31	0.00206839	0.255095	0.25	0.19	1	1	HEP1	Brd3
Araf1	0.00450668	0.255095	0.41	0.347	1	1	HEP1	Araf
Ap2a12	0.00317855	0.254805	0.322	0.256	1	1	HEP1	Ap2a1
Lect21	0.00145404	0.252821	0.717	0.687	1	1	HEP1	Lect2
Xpnpep12	0.00153627	0.252674	0.324	0.253	1	1	HEP1	Xpnpep1
Baz1b2	0.00142909	0.252598	0.309	0.237	1	1	HEP1	Baz1b
Slc17a32	0.00104936	0.25225	0.359	0.28	1	1	HEP1	Slc17a3
Mvd1	0.000790656	0.251658	0.363	0.283	1	1	HEP1	Mvd
Tbc1d2b2	0.00416347	0.25135	0.279	0.218	1	1	HEP1	Tbc1d2b
Aldh16a11	0.00466302	0.250453	0.357	0.295	1	1	HEP1	Aldh16a1
Nagk2	0.000531469	0.250305	0.379	0.297	1	1	HEP1	Nagk
Ambp2	5.11798884891883e-12	0.249908	0.996	0.986	8.10126454895362e-08	1	HEP1	Ambp
Tmem1351	0.00964694	0.249613	0.406	0.349	1	1	HEP1	Tmem135
Nfam13	7.79951144139127e-05	0.249506	0.279	0.196	1	1	HEP1	Nfam1
Pelo1	0.00829973	0.248684	0.25	0.195	1	1	HEP1	Pelo
Rnf1452	0.00268886	0.247083	0.266	0.204	1	1	HEP1	Rnf145
Slc20a21	0.00244545	0.246769	0.336	0.269	1	1	HEP1	Slc20a2
Iars21	0.00653636	0.246276	0.311	0.252	1	1	HEP1	Iars2
Tnfrsf213	0.00117608	0.246049	0.258	0.192	1	1	HEP1	Tnfrsf21
Pafah21	0.000291778	0.245418	0.418	0.327	1	1	HEP1	Pafah2
Tmem971	0.00103346	0.245418	0.512	0.43	1	1	HEP1	Tmem97
Ciao11	0.00407409	0.243676	0.334	0.268	1	1	HEP1	Ciao1
Nudt52	0.00355658	0.2432	0.26	0.2	1	1	HEP1	Nudt5
Slc9a3r22	0.00572029	0.243055	0.273	0.215	1	1	HEP1	Slc9a3r2
Asph1	0.00649891	0.242978	0.25	0.195	1	1	HEP1	Asph
Tns11	0.00434782	0.242095	0.266	0.207	1	1	HEP1	Tns1
Tsr31	0.00231288	0.24174	0.283	0.216	1	1	HEP1	Tsr3
Rfc22	0.000873436	0.23995	0.367	0.287	1	1	HEP1	Rfc2
Gbp83	0.00014049	0.239188	0.25	0.174	1	1	HEP1	Gbp8
Wdr821	0.00384695	0.239082	0.281	0.22	1	1	HEP1	Wdr82
Agpat21	0.00106087	0.237784	0.863	0.841	1	1	HEP1	Agpat2
Emc82	0.00888369	0.237267	0.283	0.227	1	1	HEP1	Emc8
Pik3cd3	8.43235388247468e-05	0.235957	0.268	0.185	1	1	HEP1	Pik3cd
Tax1bp34	0.000164091	0.235038	0.408	0.314	1	1	HEP1	Tax1bp3
Zdhhc121	0.00862436	0.234796	0.264	0.209	1	1	HEP1	Zdhhc12
Cyp512	0.000578437	0.233221	0.668	0.606	1	1	HEP1	Cyp51
Glyctk	0.00294653	0.232154	0.561	0.52	1	1	HEP1	Glyctk
Atl31	0.00537812	0.231761	0.414	0.348	1	1	HEP1	Atl3
Madd1	0.00210787	0.230085	0.252	0.188	1	1	HEP1	Madd
Coq71	0.00584772	0.229854	0.447	0.384	1	1	HEP1	Coq7
Prrc2b2	0.00483724	0.229119	0.283	0.222	1	1	HEP1	Prrc2b
Wdfy33	0.00105812	0.228417	0.301	0.228	1	1	HEP1	Wdfy3
Ppcs1	0.00221617	0.228185	0.363	0.29	1	1	HEP1	Ppcs
Slc22a181	0.00562767	0.228098	0.377	0.312	1	1	HEP1	Slc22a18
Slbp3	0.00757163	0.227062	0.291	0.233	1	1	HEP1	Slbp
Dut2	0.0066556	0.226108	0.303	0.245	1	1	HEP1	Dut
Mpp13	0.00127288	0.226006	0.402	0.324	1	1	HEP1	Mpp1
Atf6b2	0.000197397	0.224489	0.322	0.235	1	1	HEP1	Atf6b
Srp682	0.00310523	0.223317	0.416	0.348	1	1	HEP1	Srp68
Mapk34	5.97164580938395e-05	0.222552	0.648	0.561	0.945252	1	HEP1	Mapk3
Ntpcr2	0.00346199	0.222317	0.299	0.236	1	1	HEP1	Ntpcr
Slc43a23	0.000125239	0.221583	0.297	0.211	1	1	HEP1	Slc43a2
Gimap62	0.00261097	0.221211	0.32	0.253	1	1	HEP1	Gimap6
Mob1b1	0.00205578	0.220941	0.328	0.257	1	1	HEP1	Mob1b
Ggct2	0.00523967	0.220467	0.34	0.276	1	1	HEP1	Ggct
Axl2	0.00053371	0.220347	0.494	0.408	1	1	HEP1	Axl
Pgp3	0.00221174	0.220005	0.344	0.272	1	1	HEP1	Pgp
Gstm71	0.00185248	0.219541	0.541	0.463	1	1	HEP1	Gstm7
Gdi12	0.00123172	0.219516	0.387	0.307	1	1	HEP1	Gdi1
Usp481	0.00374434	0.218773	0.266	0.205	1	1	HEP1	Usp48
Cttn3	0.00363474	0.218187	0.352	0.283	1	1	HEP1	Cttn
Timm442	0.00304821	0.218184	0.367	0.297	1	1	HEP1	Timm44
Ramp22	0.00127673	0.217981	0.359	0.283	1	1	HEP1	Ramp2
C32	2.60746557572012e-11	0.21709	1	1	4.12735725980738e-07	1	HEP1	C3
Dus1l	0.00066544	0.215937	0.447	0.359	1	1	HEP1	Dus1l
Slc41a22	0.000628731	0.215781	0.449	0.376	1	1	HEP1	Slc41a2
Mbd13	0.00267552	0.215199	0.309	0.243	1	1	HEP1	Mbd1
Pes11	0.00508928	0.213872	0.25	0.192	1	1	HEP1	Pes1
Lbr3	0.00250436	0.213254	0.273	0.207	1	1	HEP1	Lbr
Pank22	0.000626181	0.211021	0.307	0.231	1	1	HEP1	Pank2
Wdr812	0.00264066	0.210984	0.34	0.266	1	1	HEP1	Wdr81
Tuba4a1	0.00585578	0.210754	0.705	0.706	1	1	HEP1	Tuba4a
Ndfip21	0.00704077	0.20939	0.32	0.257	1	1	HEP1	Ndfip2
Metap1d2	0.00210511	0.209284	0.383	0.311	1	1	HEP1	Metap1d
Fyttd12	0.00169717	0.209254	0.303	0.231	1	1	HEP1	Fyttd1
Ddx393	0.00204475	0.209146	0.303	0.234	1	1	HEP1	Ddx39
Elk42	0.00841412	0.208598	0.295	0.237	1	1	HEP1	Elk4
Crcp1	0.0056238	0.20846	0.324	0.262	1	1	HEP1	Crcp
Trim84	0.00938641	0.207968	0.26	0.206	1	1	HEP1	Trim8
Nod13	0.000310514	0.207006	0.324	0.24	1	1	HEP1	Nod1
Unc1193	0.00174172	0.206608	0.299	0.228	1	1	HEP1	Unc119
Trim112	0.00894174	0.204822	0.256	0.201	1	1	HEP1	Trim11
Lair14	0.000677432	0.204756	0.273	0.2	1	1	HEP1	Lair1
Ugdh1	0.00640926	0.20415	0.596	0.582	1	1	HEP1	Ugdh
Stk382	0.00670316	0.203317	0.369	0.302	1	1	HEP1	Stk38
Tpmt1	0.00871797	0.20311	0.326	0.264	1	1	HEP1	Tpmt
2310015A16Rik2	0.00964214	0.202349	0.252	0.198	1	1	HEP1	2310015A16Rik
Ncaph22	0.00333844	0.2021	0.389	0.317	1	1	HEP1	Ncaph2
Gcn12	0.00414101	0.20115	0.301	0.235	1	1	HEP1	Gcn1
Col14a13	0.00780816	0.201078	0.504	0.448	1	1	HEP1	Col14a1
Tmpo3	0.00132444	0.200934	0.412	0.331	1	1	HEP1	Tmpo
Tmem176b2	4.05216265549513e-05	0.199938	0.965	0.927	0.641417	1	HEP1	Tmem176b
Lbp3	8.67062183863599e-08	0.199583	0.844	0.751	0.00137247	1	HEP1	Lbp
Itgal4	0.00140981	0.198415	0.518	0.445	1	1	HEP1	Itgal
Ccpg11	0.00233154	0.196635	0.402	0.325	1	1	HEP1	Ccpg1
Hdgfl22	0.000508899	0.19609	0.301	0.223	1	1	HEP1	Hdgfl2
Abi33	0.000444332	0.195339	0.309	0.229	1	1	HEP1	Abi3
Cpb23	9.12071716639185e-11	0.194632	0.918	0.889	1.44371832026817e-06	1	HEP1	Cpb2
Tfe34	0.00563773	0.19453	0.268	0.207	1	1	HEP1	Tfe3
Acly1	7.99883057715338e-05	0.194117	0.77	0.74	1	1	HEP1	Acly
Fdps1	1.46946501933732e-07	0.193066	0.912	0.864	0.00232602	1	HEP1	Fdps
Ppil12	0.00206144	0.192092	0.285	0.218	1	1	HEP1	Ppil1
Ube2g22	0.00216906	0.189974	0.383	0.307	1	1	HEP1	Ube2g2
Me11	0.00109832	0.189618	0.533	0.456	1	1	HEP1	Me1
Fbh12	0.00436414	0.189403	0.291	0.226	1	1	HEP1	Fbh1
Cnot63	0.00916355	0.188717	0.279	0.222	1	1	HEP1	Cnot6
Znrd1as1	0.00100027	0.188589	0.293	0.221	1	1	HEP1	Znrd1as
Tor3a4	0.00322535	0.187822	0.25	0.19	1	1	HEP1	Tor3a
Palld2	0.00442747	0.185627	0.326	0.259	1	1	HEP1	Palld
Herc12	0.00330131	0.185131	0.268	0.205	1	1	HEP1	Herc1
Ptprj3	0.000696202	0.184822	0.395	0.31	1	1	HEP1	Ptprj
Mrto42	0.00263797	0.183665	0.395	0.319	1	1	HEP1	Mrto4
Gdf152	3.27544122008919e-09	0.182137	0.363	0.234	5.18469590727918e-05	1	HEP1	Gdf15
Mafg2	0.00584367	0.182078	0.355	0.288	1	1	HEP1	Mafg
Ikbkg2	0.00531078	0.181671	0.316	0.252	1	1	HEP1	Ikbkg
Ranbp10	0.00719332	0.179627	0.256	0.198	1	1	HEP1	Ranbp10
Thrsp1	4.85843757982526e-10	0.178972	0.832	0.746	7.69042084510541e-06	1	HEP1	Thrsp
Herpud12	0.000748563	0.178945	0.744	0.778	1	1	HEP1	Herpud1
Gstm41	0.00389457	0.178703	0.393	0.324	1	1	HEP1	Gstm4
Senp61	0.00639213	0.178514	0.293	0.233	1	1	HEP1	Senp6
Gatm3	0.000591763	0.178114	0.32	0.24	1	1	HEP1	Gatm
Dhcr241	0.00108135	0.177785	0.852	0.816	1	1	HEP1	Dhcr24
Hmgcr2	0.00418849	0.177013	0.385	0.315	1	1	HEP1	Hmgcr
Ces2a2	0.00183981	0.173854	0.738	0.691	1	1	HEP1	Ces2a
Dnajc72	0.00411677	0.172913	0.363	0.292	1	1	HEP1	Dnajc7
Dgat23	0.00101087	0.172872	0.939	0.896	1	1	HEP1	Dgat2
Pdxk2	0.00507754	0.167223	0.299	0.235	1	1	HEP1	Pdxk
Mndal3	0.000691262	0.165635	0.338	0.255	1	1	HEP1	Mndal
Eftud22	0.00386994	0.16302	0.279	0.214	1	1	HEP1	Eftud2
Gsk3a3	0.00714099	0.161564	0.303	0.242	1	1	HEP1	Gsk3a
Ube3b2	0.00413287	0.161003	0.348	0.276	1	1	HEP1	Ube3b
Aig12	0.00754942	0.160466	0.334	0.268	1	1	HEP1	Aig1
Itih21	0.0047433	0.160286	0.928	0.897	1	1	HEP1	Itih2
Myo102	0.00248823	0.156447	0.322	0.25	1	1	HEP1	Myo10
B4galt53	0.00041476	0.150493	0.357	0.267	1	1	HEP1	B4galt5
Pla2g152	0.00642349	0.148269	0.252	0.194	1	1	HEP1	Pla2g15
Apobec13	0.00663286	0.147602	0.285	0.222	1	1	HEP1	Apobec1
Nek93	0.00150095	0.146282	0.367	0.289	1	1	HEP1	Nek9
Uap1l13	0.00165904	0.142857	0.309	0.236	1	1	HEP1	Uap1l1
Gck1	0.00559956	0.142735	0.398	0.322	1	1	HEP1	Gck
Klc12	0.00790078	0.142287	0.254	0.198	1	1	HEP1	Klc1
Gas2l12	0.00916635	0.140948	0.25	0.193	1	1	HEP1	Gas2l1
Map113	0.00079221	0.135336	0.285	0.208	1	1	HEP1	Map11
Plscr13	0.000716003	0.132939	0.436	0.343	1	1	HEP1	Plscr1
Saa42	2.34735531850091e-08	0.13263	0.936	0.833	0.000371563	1	HEP1	Saa4
Keap12	0.00545159	0.125725	0.42	0.344	1	1	HEP1	Keap1
Tifa2	0.000446271	0.120104	0.545	0.465	1	1	HEP1	Tifa
Safb3	0.00938702	0.117656	0.307	0.244	1	1	HEP1	Safb
C4b2	0.00678671	0.115333	0.965	0.951	1	1	HEP1	C4b
Hnrnpul22	0.00858879	0.110506	0.391	0.322	1	1	HEP1	Hnrnpul2
Lamb13	9.78875554991838e-05	0.108938	0.299	0.211	1	1	HEP1	Lamb1
Cldn143	0.00402025	0.105219	0.295	0.227	1	1	HEP1	Cldn14
Mup111	9.23471250911413e-179	3.60797	0.922	0.486	1.46176264306767e-174	2	HEP0	Mup11
Mup171	4.26510395526112e-131	2.95171	0.925	0.507	6.75123305078283e-127	2	HEP0	Mup17
Cyp2b13	7.06650398215521e-82	2.92865	0.31	0.062	1.11855691533535e-77	2	HEP0	Cyp2b13
Mup12	1.50733785378461e-92	2.76297	0.432	0.109	2.38596508875565e-88	2	HEP0	Mup12
Mup161	3.95790613143757e-138	2.4832	0.751	0.26	6.26496961545252e-134	2	HEP0	Mup16
Mup71	4.69517909827662e-113	2.44844	0.839	0.407	7.43199899466206e-109	2	HEP0	Mup7
Mup13	2.45374420837777e-76	2.0367	0.637	0.272	3.88403170744117e-72	2	HEP0	Mup1
Mup3	1.22984271459796e-155	1.87803	1	0.944	1.94671803293712e-151	2	HEP0	Mup3
Cyp2b9	4.18900612519086e-33	1.86679	0.449	0.254	6.6307777955646e-29	2	HEP0	Cyp2b9
Cyp7b12	2.10800502831933e-20	1.8575	0.457	0.284	3.33676115932666e-16	2	HEP0	Cyp7b1
Mup202	6.62370756534911e-22	1.84512	0.945	0.85	1.04846667051911e-17	2	HEP0	Mup20
Gm13775	8.54766536090389e-48	1.83581	0.379	0.135	1.35300994997748e-43	2	HEP0	Gm13775
mt-Atp82	1.26111447285787e-38	1.82962	0.369	0.15	1.99621809908672e-34	2	HEP0	mt-Atp8
Mup9	3.37098546013915e-30	1.73142	0.358	0.159	5.33593288485427e-26	2	HEP0	Mup9
Serpina3m2	5.29334083245725e-13	1.71937	0.795	0.776	8.37882920369658e-09	2	HEP0	Serpina3m
Itih41	2.7728726356743e-16	1.70844	0.918	0.966	4.38918009500885e-12	2	HEP0	Itih4
Slco1a1	3.10392702828631e-60	1.67826	0.488	0.183	4.91320609307439e-56	2	HEP0	Slco1a1
Cyp2b10	1.70086998448338e-28	1.64039	0.308	0.131	2.69230709843874e-24	2	HEP0	Cyp2b10
Car31	2.7652043113363e-113	1.61719	0.95	0.723	4.37704190441424e-109	2	HEP0	Car3
Fbxo31	1.1733379303041e-16	1.5587	0.352	0.212	1.85727660987835e-12	2	HEP0	Fbxo31
Gm43305	5.98063706654485e-09	1.55749	0.289	0.19	9.46675041263384e-05	2	HEP0	Gm43305
Gm424183	6.02119420662873e-24	1.52718	0.742	0.586	9.53094830967262e-20	2	HEP0	Gm42418
Cyp2a4	4.33133370123078e-31	1.47637	0.358	0.157	6.8560681156782e-27	2	HEP0	Cyp2a4
Hectd2os	1.74862908991958e-29	1.47245	0.314	0.128	2.7679049864337e-25	2	HEP0	Hectd2os
Nlrp12	7.0482049070733e-12	1.46638	0.363	0.236	1.11566035474063e-07	2	HEP0	Nlrp12
Tedc2	6.8587904598889e-26	1.44237	0.371	0.185	1.08567794189581e-21	2	HEP0	Tedc2
Slc22a261	6.35109268620937e-28	1.44157	0.371	0.18	1.00531446130008e-23	2	HEP0	Slc22a26
Serpina3k1	6.33911161860832e-47	1.39217	1	0.979	1.00341797810951e-42	2	HEP0	Serpina3k
Lars23	1.51642473257047e-27	1.34382	0.453	0.244	2.4003487091858e-23	2	HEP0	Lars2
Ces1d1	4.38876241846114e-45	1.34221	0.862	0.704	6.94697203218214e-41	2	HEP0	Ces1d
Selenbp21	2.30696352138319e-33	1.34004	0.551	0.321	3.65169255799745e-29	2	HEP0	Selenbp2
Cyp2c40	8.51070797280917e-18	1.29501	0.497	0.376	1.34715996501596e-13	2	HEP0	Cyp2c40
mt-Nd4l2	4.08186497468825e-23	1.27702	0.356	0.178	6.46118406843403e-19	2	HEP0	mt-Nd4l
Fga1	5.54490622860112e-18	1.27318	1	0.984	8.77703206925271e-14	2	HEP0	Fga
Mt12	0.000109266	1.22488	0.822	0.987	1	2	HEP0	Mt1
Saa41	2.8203554626276e-22	1.2183	0.799	0.847	4.46434066179323e-18	2	HEP0	Saa4
Cyp4a12a1	1.86648939420554e-18	1.21066	0.27	0.127	2.95446606208794e-14	2	HEP0	Cyp4a12a
Cyp2d401	1.18347347343371e-33	1.19344	0.587	0.352	1.87332016109822e-29	2	HEP0	Cyp2d40
Fgb1	4.80616527735548e-13	1.17977	1	0.997	7.60767901752598e-09	2	HEP0	Fgb
Mt22	1.00659222952904e-06	1.17433	0.671	0.919	0.0159333	2	HEP0	Mt2
mt-Nd52	2.28874052610296e-26	1.15892	0.566	0.37	3.62284737876838e-22	2	HEP0	mt-Nd5
Gadd45g2	3.35678312697404e-14	1.15626	0.646	0.544	5.31345201168721e-10	2	HEP0	Gadd45g
Retsat1	1.95540496282274e-55	1.14826	0.757	0.435	3.09521051565211e-51	2	HEP0	Retsat
Creld21	8.40464261673123e-07	1.11767	0.553	0.472	0.0133037	2	HEP0	Creld2
Fgg1	9.98350665901509e-18	1.1086	1	0.988	1.5802892690555e-13	2	HEP0	Fgg
Lpin12	3.0256983824989e-21	1.10183	0.386	0.205	4.78937796965751e-17	2	HEP0	Lpin1
Ppp1r3c	3.37084584325707e-17	1.09821	0.39	0.232	5.33571188529162e-13	2	HEP0	Ppp1r3c
Cyp2c671	1.10805984911798e-30	1.09742	0.524	0.29	1.75394793516885e-26	2	HEP0	Cyp2c67
Cyp4a14	1.78594875771927e-30	1.08578	0.616	0.397	2.82697828859384e-26	2	HEP0	Cyp4a14
Ces1f	1.26149247611259e-31	1.08389	0.761	0.631	1.99681644043862e-27	2	HEP0	Ces1f
Gm3734	2.41497978075057e-11	1.07618	0.252	0.141	3.82267149495007e-07	2	HEP0	Gm3734
Gm8883	3.03458194132297e-08	1.04669	0.423	0.332	0.000480344	2	HEP0	Gm8883
Ces1e	1.2491160911697e-20	1.04605	0.459	0.274	1.97722586071251e-16	2	HEP0	Ces1e
Apol9a	1.72197812241567e-18	1.01854	0.451	0.278	2.72571916997176e-14	2	HEP0	Apol9a
Gm2788	2.10875689195345e-20	0.994667	0.589	0.415	3.33795128427312e-16	2	HEP0	Gm2788
Mup211	3.57286806366332e-12	0.980819	0.4	0.266	5.65549285797267e-08	2	HEP0	Mup21
Serpina102	2.78693857782844e-07	0.971668	0.73	0.724	0.00441144	2	HEP0	Serpina10
Crp2	2.80790835764598e-25	0.963841	0.872	0.853	4.44463813931782e-21	2	HEP0	Crp
Cxcl15	1.18514714977887e-18	0.96307	0.61	0.552	1.87596942338498e-14	2	HEP0	Cxcl1
Mup14	3.73498575329039e-23	0.958662	0.463	0.254	5.91210894888335e-19	2	HEP0	Mup14
Ugt2b11	2.59563915755343e-31	0.951435	0.583	0.327	4.10863722249133e-27	2	HEP0	Ugt2b1
Serpina111	7.93393516371517e-13	0.948429	0.56	0.43	1.25586259706447e-08	2	HEP0	Serpina11
Ldhd1	1.60016285715083e-20	0.930514	0.669	0.535	2.53289778658406e-16	2	HEP0	Ldhd
Lbp2	9.06049576542361e-18	0.930205	0.704	0.766	1.4341858747089e-13	2	HEP0	Lbp
Onecut2	5.19831773008412e-14	0.923533	0.283	0.15	8.22841713495015e-10	2	HEP0	Onecut2
Cyp2a12	1.81227385621342e-27	0.911071	0.811	0.702	2.86864828700023e-23	2	HEP0	Cyp2a12
Sult2a8	1.4941668207736e-54	0.90785	0.87	0.578	2.36511666060253e-50	2	HEP0	Sult2a8
Gfra11	2.68559961858983e-05	0.901847	0.396	0.325	0.425104	2	HEP0	Gfra1
Lurap1l1	3.93335959215484e-12	0.901298	0.392	0.259	6.2261148984219e-08	2	HEP0	Lurap1l
Mgll1	4.13686104115658e-18	0.899881	0.434	0.253	6.54823734204675e-14	2	HEP0	Mgll
Smoc1	2.33152770391342e-09	0.899646	0.369	0.261	3.69057520252456e-05	2	HEP0	Smoc1
Oplah1	1.54022434453161e-11	0.898924	0.484	0.356	2.43802111495909e-07	2	HEP0	Oplah
Steap42	1.80751487708493e-09	0.894628	0.734	0.834	2.86111529893773e-05	2	HEP0	Steap4
Vtn1	2.08101726332292e-22	0.878274	0.994	0.961	3.29404222611385e-18	2	HEP0	Vtn
Hp1	0.00110025	0.873806	0.992	1	1	2	HEP0	Hp
Apoa41	6.5592852698659e-09	0.866004	0.48	0.377	0.000103827	2	HEP0	Apoa4
Dnajb92	4.78523707045562e-08	0.852944	0.367	0.261	0.000757455	2	HEP0	Dnajb9
Mbd12	1.38118640561745e-08	0.839931	0.348	0.24	0.000218628	2	HEP0	Mbd1
Cyp2c291	9.4380811690923e-40	0.837618	0.889	0.754	1.49395386825562e-35	2	HEP0	Cyp2c29
Ugt3a11	4.79369971528196e-14	0.830546	0.428	0.27	7.58794727931982e-10	2	HEP0	Ugt3a1
Cyp3a131	1.04676087343408e-16	0.830044	0.669	0.56	1.65691778655881e-12	2	HEP0	Cyp3a13
Arhgap52	3.13799907177889e-12	0.826629	0.34	0.205	4.96713873071881e-08	2	HEP0	Arhgap5
Slc25a251	3.13135452610239e-15	0.815795	0.509	0.351	4.95662107936748e-11	2	HEP0	Slc25a25
mt-Nd42	8.99298811922077e-30	0.812848	0.985	0.887	1.42350008939146e-25	2	HEP0	mt-Nd4
Ripk21	7.5669952650845e-13	0.811522	0.266	0.145	1.19777968051022e-08	2	HEP0	Ripk2
Qsox11	2.03608662385786e-09	0.811364	0.763	0.825	3.22292151690461e-05	2	HEP0	Qsox1
Apcs2	0.00600266	0.805762	0.736	0.915	1	2	HEP0	Apcs
Syvn1	1.7071345646866e-05	0.805333	0.373	0.297	0.270222	2	HEP0	Syvn1
Slc41a21	0.000651583	0.789831	0.423	0.379	1	2	HEP0	Slc41a2
Cyp4a10	4.84298682226915e-38	0.789603	0.715	0.422	7.66596384096984e-34	2	HEP0	Cyp4a10
Cyp8b11	1.92015778024418e-20	0.787776	0.526	0.323	3.03941775034851e-16	2	HEP0	Cyp8b1
Hpx2	6.75086534185982e-05	0.786198	0.998	0.999	1	2	HEP0	Hpx
Cyp2f2	1.40733005582668e-44	0.782389	0.885	0.687	2.22766274536805e-40	2	HEP0	Cyp2f2
Apol9b1	1.00924300473374e-15	0.777354	0.57	0.417	1.59753075219304e-11	2	HEP0	Apol9b
Slc17a21	7.89094509304481e-16	0.774413	0.692	0.576	1.24905769877806e-11	2	HEP0	Slc17a2
mt-Nd22	1.6066408472625e-23	0.77383	0.973	0.886	2.5431517971318e-19	2	HEP0	mt-Nd2
Fgf11	3.55762494505537e-10	0.773652	0.331	0.209	5.63136452552814e-06	2	HEP0	Fgf1
Gbp63	3.18975504542033e-12	0.764327	0.287	0.163	5.04906326139585e-08	2	HEP0	Gbp6
Zbtb201	1.24443386205646e-05	0.760524	0.254	0.177	0.196981	2	HEP0	Zbtb20
Iigp12	3.22940260810888e-23	0.75721	0.811	0.754	5.11182138837555e-19	2	HEP0	Iigp1
Chpt12	1.27142179070699e-16	0.751755	0.581	0.396	2.0125335525101e-12	2	HEP0	Chpt1
mt-Atp62	2.09090283107069e-32	0.748502	0.994	0.948	3.3096900913018e-28	2	HEP0	mt-Atp6
Stap22	3.97725910705716e-06	0.746816	0.386	0.309	0.062956	2	HEP0	Stap2
Fgl11	7.02835871571281e-06	0.746793	0.792	0.928	0.111252	2	HEP0	Fgl1
Cyp2c54	1.83514201615735e-20	0.741472	0.577	0.372	2.90484629737547e-16	2	HEP0	Cyp2c54
Dpy19l11	0.0083516	0.740992	0.317	0.275	1	2	HEP0	Dpy19l1
Acox11	8.75190019103571e-27	0.73912	0.992	0.935	1.38533828123904e-22	2	HEP0	Acox1
Vnn1	6.03212057918084e-11	0.73811	0.367	0.235	9.54824366478535e-07	2	HEP0	Vnn1
Pcx1	8.4318389767665e-11	0.734058	0.79	0.762	1.33467579163237e-06	2	HEP0	Pcx
Cfhr11	3.10557757258612e-18	0.732917	0.633	0.465	4.91581873964658e-14	2	HEP0	Cfhr1
Nr1i3	6.28287930578308e-12	0.732357	0.468	0.332	9.94516965312404e-08	2	HEP0	Nr1i3
Slc39a142	5.9686390066786e-06	0.72703	0.625	0.58	0.0944776	2	HEP0	Slc39a14
Klf91	4.99529842549902e-11	0.72451	0.348	0.217	7.9070578777224e-07	2	HEP0	Klf9
Sugct	5.53477317073823e-09	0.717784	0.319	0.207	8.76099245196155e-05	2	HEP0	Sugct
Ces1b	1.5962234637795e-14	0.716442	0.47	0.308	2.52666212081656e-10	2	HEP0	Ces1b
Hykk	3.51486192956464e-08	0.711074	0.256	0.157	0.000556367	2	HEP0	Hykk
Cyp2c37	9.66568920620646e-21	0.709351	0.6	0.404	1.52998194445042e-16	2	HEP0	Cyp2c37
Cldn142	0.00785846	0.708644	0.27	0.229	1	2	HEP0	Cldn14
Mat1a1	1.80823783472805e-12	0.705163	0.977	0.922	2.86225966859103e-08	2	HEP0	Mat1a
mt-Co22	1.2865866407726e-21	0.702773	0.971	0.909	2.03653799367895e-17	2	HEP0	mt-Co2
Leap21	3.48265103316995e-25	0.702517	0.801	0.622	5.51268832040471e-21	2	HEP0	Leap2
Nfia1	1.07641087082384e-06	0.69975	0.258	0.171	0.0170385	2	HEP0	Nfia
Serpina1e1	1.05084835106674e-20	0.698796	0.99	0.86	1.66338785490355e-16	2	HEP0	Serpina1e
Cfhr21	3.91056866350546e-49	0.696335	0.975	0.789	6.19003913746279e-45	2	HEP0	Cfhr2
Mgam	1.82545692714011e-09	0.694313	0.413	0.296	2.88951576997007e-05	2	HEP0	Mgam
Rtp31	2.2474025100161e-08	0.694019	0.386	0.28	0.000355741	2	HEP0	Rtp3
mt-Nd12	2.96626725997192e-16	0.690955	0.935	0.846	4.69530444580955e-12	2	HEP0	mt-Nd1
Tdo21	2.30729142202609e-27	0.685454	0.998	0.847	3.65221159192509e-23	2	HEP0	Tdo2
Gltpd21	1.36581185213101e-10	0.682737	0.547	0.43	2.16194358073818e-06	2	HEP0	Gltpd2
Hopx1	3.52011430264408e-06	0.682578	0.509	0.439	0.0557199	2	HEP0	Hopx
Pck1	6.1485238994484e-25	0.681491	0.973	0.837	9.73249848043687e-21	2	HEP0	Pck1
Abcc6	9.08536401894039e-11	0.678152	0.472	0.341	1.43812227055807e-06	2	HEP0	Abcc6
Pim31	1.1459582429224e-05	0.677269	0.384	0.298	0.181394	2	HEP0	Pim3
Pcsk61	9.22776993796194e-10	0.677118	0.392	0.268	1.46066370348e-05	2	HEP0	Pcsk6
mt-Nd32	3.18303480707002e-17	0.677108	0.696	0.562	5.03842579611114e-13	2	HEP0	mt-Nd3
Ppm1k	2.34110388397065e-07	0.672867	0.308	0.209	0.00370573	2	HEP0	Ppm1k
Vwa8	1.5855294242759e-08	0.671062	0.413	0.299	0.000250973	2	HEP0	Vwa8
Inmt1	5.48104558101275e-22	0.670388	0.797	0.685	8.67594705018509e-18	2	HEP0	Inmt
Saa34	2.87847053959988e-23	0.666381	0.633	0.888	4.55633101713265e-19	2	HEP0	Saa3
Gm47881	5.24881977070165e-19	0.662702	0.635	0.445	8.30835681504365e-15	2	HEP0	Gm4788
Sult1a11	1.75142407137892e-10	0.662648	0.807	0.782	2.7723291625857e-06	2	HEP0	Sult1a1
Malat13	1.60688806362416e-06	0.659747	0.407	0.319	0.0254354	2	HEP0	Malat1
Acsm31	5.95384787841292e-09	0.656789	0.369	0.252	9.42434580673981e-05	2	HEP0	Acsm3
Abca8a	6.33851320783694e-08	0.656719	0.342	0.236	0.00100332	2	HEP0	Abca8a
Prps11	2.40947632897246e-05	0.652424	0.283	0.207	0.381396	2	HEP0	Prps1
Acnat2	0.000286467	0.651734	0.256	0.196	1	2	HEP0	Acnat2
Cdo11	4.32299520055859e-25	0.651602	0.985	0.946	6.84286910296419e-21	2	HEP0	Cdo1
Apob1	3.75128349640661e-38	0.646751	0.992	0.903	5.93790664646202e-34	2	HEP0	Apob
Gc1	1.37005999339919e-35	0.644451	1	0.986	2.16866796355158e-31	2	HEP0	Gc
Creb3l31	3.85161569240215e-12	0.642336	0.795	0.725	6.09672247950336e-08	2	HEP0	Creb3l3
Hgfac1	6.55414329143637e-13	0.641433	0.683	0.593	1.03745534160146e-08	2	HEP0	Hgfac
Serpinf21	7.49901582236609e-14	0.641424	0.91	0.918	1.18701921452233e-09	2	HEP0	Serpinf2
Fabp11	2.66478177703265e-49	0.63918	1	0.989	4.21808307486498e-45	2	HEP0	Fabp1
Aass1	1.36351111495687e-12	0.63813	0.732	0.654	2.15830174386523e-08	2	HEP0	Aass
Mbl11	6.71903862521089e-10	0.633288	0.788	0.74	1.06355662398463e-05	2	HEP0	Mbl1
Ambp1	4.68920994573678e-16	0.629284	0.996	0.986	7.42255042310675e-12	2	HEP0	Ambp
Apon1	5.59856790652084e-14	0.628873	0.849	0.84	8.86197313923184e-10	2	HEP0	Apon
Trp53inp21	4.09709744969216e-07	0.626854	0.532	0.457	0.0064853	2	HEP0	Trp53inp2
Lcat1	2.38953396858753e-11	0.626116	0.788	0.725	3.7823933188772e-07	2	HEP0	Lcat
Cgnl1	2.38619999964704e-05	0.622436	0.258	0.183	0.377712	2	HEP0	Cgnl1
Pm20d11	3.99263617863575e-09	0.620219	0.409	0.289	6.31994380716253e-05	2	HEP0	Pm20d1
Slc30a10	2.49576467727797e-06	0.619937	0.333	0.245	0.0395055	2	HEP0	Slc30a10
Slc27a51	3.73291884529592e-22	0.617425	0.908	0.844	5.90883724021891e-18	2	HEP0	Slc27a5
Ces3a1	9.78247537757469e-34	0.616322	0.981	0.851	1.5484680275163e-29	2	HEP0	Ces3a
Ces2a1	1.10679766336909e-18	0.615351	0.799	0.685	1.75195002134694e-14	2	HEP0	Ces2a
Rdh71	5.11939460394489e-31	0.615341	0.985	0.871	8.10348971858437e-27	2	HEP0	Rdh7
Csad1	8.8970774458713e-17	0.614955	0.702	0.569	1.40831838890697e-12	2	HEP0	Csad
Atp6v1h1	5.39061534515741e-07	0.614878	0.371	0.272	0.0085328	2	HEP0	Atp6v1h
Slc27a21	9.80286278549549e-28	0.61289	0.935	0.796	1.55169515031608e-23	2	HEP0	Slc27a2
Csrp31	1.21757532368972e-06	0.612198	0.415	0.325	0.019273	2	HEP0	Csrp3
Pzp1	6.33039591809481e-17	0.612123	0.998	0.966	1.00203836987523e-12	2	HEP0	Pzp
C8g1	2.86795111959064e-23	0.610143	0.95	0.876	4.53967982720002e-19	2	HEP0	C8g
Ugt2a31	1.65412187715805e-16	0.608786	0.677	0.498	2.61830951935348e-12	2	HEP0	Ugt2a3
4732465J04Rik	2.63433455626469e-08	0.607683	0.568	0.481	0.000416989	2	HEP0	4732465J04Rik
Eci21	7.4542448381946e-11	0.607162	0.738	0.662	1.17993241543782e-06	2	HEP0	Eci2
Gm269172	9.56034610688307e-10	0.604088	0.279	0.164	1.51330718525852e-05	2	HEP0	Gm26917
Slc17a31	8.76371586606644e-06	0.603518	0.365	0.28	0.138721	2	HEP0	Slc17a3
Apof1	8.04960286539969e-14	0.602728	0.91	0.924	1.27417163756412e-09	2	HEP0	Apof
Stard41	1.84216629232285e-08	0.601726	0.329	0.215	0.000291597	2	HEP0	Stard4
Pex11a1	0.000200724	0.601626	0.258	0.192	1	2	HEP0	Pex11a
Trabd1	2.6707518878916e-06	0.601353	0.434	0.34	0.0422753	2	HEP0	Trabd
Apoh1	1.80868010899319e-33	0.599168	1	0.939	2.86295974452532e-29	2	HEP0	Apoh
Cyp2j51	2.93944528625478e-18	0.597685	0.851	0.76	4.65284794361269e-14	2	HEP0	Cyp2j5
Slc22a30	1.87057437699445e-13	0.597663	0.606	0.456	2.96093218134451e-09	2	HEP0	Slc22a30
Kmo1	2.77331614656009e-09	0.597252	0.581	0.471	4.38988212838997e-05	2	HEP0	Kmo
Magt11	4.73043967823848e-07	0.596986	0.348	0.245	0.00748781	2	HEP0	Magt1
Akr1c141	3.18830009254231e-17	0.59655	0.591	0.402	5.04676021648522e-13	2	HEP0	Akr1c14
2810459M11Rik1	4.20600415670013e-06	0.595794	0.352	0.262	0.0665768	2	HEP0	2810459M11Rik
Flad11	0.000179203	0.594402	0.296	0.226	1	2	HEP0	Flad1
Myo18a1	4.92329261598265e-06	0.590271	0.314	0.225	0.0779308	2	HEP0	Myo18a
Tfr21	1.13439197227725e-10	0.5898	0.774	0.787	1.79562905291767e-06	2	HEP0	Tfr2
Herpud11	4.79071254103343e-09	0.588281	0.881	0.764	7.58321888120182e-05	2	HEP0	Herpud1
Cfb2	1.19088602403695e-08	0.587893	0.935	0.976	0.000188505	2	HEP0	Cfb
Errfi11	3.70807749406931e-25	0.584056	0.979	0.851	5.86951586536231e-21	2	HEP0	Errfi1
Clpb	2.03272673374117e-05	0.582933	0.27	0.191	0.32176	2	HEP0	Clpb
Serpina1d1	2.30172527919877e-35	0.5829	1	0.953	3.64340094444374e-31	2	HEP0	Serpina1d
Chuk2	9.68476334628046e-10	0.582083	0.413	0.28	1.53300119008273e-05	2	HEP0	Chuk
Ecsit1	0.000122503	0.581292	0.268	0.197	1	2	HEP0	Ecsit
Gm48633	3.64873229754648e-05	0.579798	0.283	0.204	0.577558	2	HEP0	Gm48633
2310015A16Rik1	0.000165961	0.578543	0.264	0.197	1	2	HEP0	2310015A16Rik
Insr1	1.33400426009244e-05	0.577805	0.35	0.266	0.21116	2	HEP0	Insr
Amy11	2.20611611738777e-07	0.577361	0.444	0.336	0.00349206	2	HEP0	Amy1
F21	8.00925211885514e-20	0.576917	0.975	0.945	1.26778451789358e-15	2	HEP0	F2
Pon11	5.18767297742312e-19	0.57663	0.889	0.799	8.21156755596306e-15	2	HEP0	Pon1
Sds	5.78519864123121e-06	0.574826	0.73	0.675	0.0915739	2	HEP0	Sds
Deptor1	3.789843984384e-07	0.572836	0.331	0.229	0.00599894	2	HEP0	Deptor
Apoa21	4.4207317633005e-39	0.571307	1	0.998	6.99757630812835e-35	2	HEP0	Apoa2
Scp21	2.42680167307619e-35	0.57128	1	0.977	3.8413843683123e-31	2	HEP0	Scp2
mt-Co32	2.76166429781607e-30	0.568604	1	0.973	4.37143841701306e-26	2	HEP0	mt-Co3
Cdip11	1.02017841414483e-05	0.568391	0.35	0.268	0.161484	2	HEP0	Cdip1
Pigr	2.43421092835375e-14	0.567649	0.893	0.857	3.85311247849116e-10	2	HEP0	Pigr
Plin5	7.95576021238031e-05	0.56752	0.344	0.27	1	2	HEP0	Plin5
Clpx1	2.52903658924135e-10	0.566855	0.74	0.693	4.00321201711014e-06	2	HEP0	Clpx
Raph11	0.000332069	0.566833	0.413	0.352	1	2	HEP0	Raph1
Hmgcs21	1.37210431701981e-33	0.563071	0.996	0.935	2.17190392341066e-29	2	HEP0	Hmgcs2
Cpb22	0.00254967	0.562173	0.841	0.897	1	2	HEP0	Cpb2
Cyp2c501	6.82472373669668e-24	0.561946	0.761	0.565	1.08028552028172e-19	2	HEP0	Cyp2c50
Alb1	2.49847762465451e-48	0.561901	1	0.997	3.95484023206563e-44	2	HEP0	Alb
Enpep1	2.75655568997044e-05	0.556893	0.277	0.199	0.436335	2	HEP0	Enpep
Hspa52	0.000127441	0.555688	0.952	0.969	1	2	HEP0	Hspa5
Sec14l41	9.34635231737315e-05	0.554907	0.252	0.181	1	2	HEP0	Sec14l4
Etnppl	1.26576680783027e-07	0.554455	0.289	0.187	0.00200358	2	HEP0	Etnppl
F11	2.60041888479007e-05	0.553674	0.365	0.281	0.41162	2	HEP0	F11
Ghr1	6.02309766354582e-24	0.552901	0.839	0.68	9.53396129162668e-20	2	HEP0	Ghr
C31	7.47498245234573e-07	0.552613	1	1	0.0118321	2	HEP0	C3
Inhbc1	0.000297335	0.551945	0.352	0.286	1	2	HEP0	Inhbc
Gm16157	2.45554058675317e-06	0.551592	0.279	0.189	0.0388688	2	HEP0	Gm16157
Hao11	8.3965751412592e-09	0.551464	0.665	0.571	0.000132909	2	HEP0	Hao1
Gcdh1	1.25069963995918e-18	0.55005	0.878	0.783	1.97973246009139e-14	2	HEP0	Gcdh
Aadat1	5.13752363145255e-07	0.549609	0.39	0.287	0.00813219	2	HEP0	Aadat
Acaa1b1	2.90318690788153e-14	0.548112	0.937	0.879	4.59545455648568e-10	2	HEP0	Acaa1b
mt-Co12	2.78018935684794e-22	0.547868	0.998	0.983	4.4007617329546e-18	2	HEP0	mt-Co1
Slc25a231	2.97010037861756e-09	0.547507	0.549	0.433	4.70137188931373e-05	2	HEP0	Slc25a23
Rp92	3.01145411694979e-07	0.54735	0.503	0.398	0.00476683	2	HEP0	Rp9
Ahcy1	4.98890789668642e-13	0.545256	0.801	0.685	7.89694230966493e-09	2	HEP0	Ahcy
Epb41l4b1	6.76339024705888e-07	0.543755	0.327	0.226	0.0107058	2	HEP0	Epb41l4b
Prg42	7.30548879897003e-05	0.541241	0.491	0.424	1	2	HEP0	Prg4
Mtfr11	1.69228348301336e-05	0.540784	0.342	0.257	0.267872	2	HEP0	Mtfr1
Cyp2d261	3.08324798058521e-21	0.539135	0.952	0.888	4.88047322846832e-17	2	HEP0	Cyp2d26
Acacb1	2.09978011847405e-05	0.5383	0.285	0.204	0.332374	2	HEP0	Acacb
Sec23a1	9.26371099080932e-05	0.538223	0.319	0.241	1	2	HEP0	Sec23a
Nedd4l	5.46854730235766e-05	0.536437	0.325	0.248	0.865616	2	HEP0	Nedd4l
Dbt1	1.05966123686266e-06	0.535844	0.348	0.246	0.0167734	2	HEP0	Dbt
Slco2a11	4.34709392857523e-06	0.535844	0.304	0.214	0.0688102	2	HEP0	Slco2a1
Plg1	5.92432009332404e-19	0.535239	0.985	0.945	9.37760627572262e-15	2	HEP0	Plg
Aadac1	2.31713861068024e-25	0.534591	0.922	0.787	3.66779870684575e-21	2	HEP0	Aadac
Slc33a11	1.12094928875911e-06	0.532829	0.409	0.309	0.0177435	2	HEP0	Slc33a1
Fbp11	2.14544777526748e-12	0.532352	0.987	0.924	3.3960292834709e-08	2	HEP0	Fbp1
Ero1lb1	2.80909984805785e-06	0.532304	0.432	0.342	0.0444652	2	HEP0	Ero1lb
Pbld2	9.19993797842941e-08	0.529918	0.516	0.406	0.00145626	2	HEP0	Pbld2
Gm272161	2.28885683126145e-07	0.529041	0.461	0.36	0.00362303	2	HEP0	Gm27216
Agt1	1.44059482945821e-14	0.528494	0.885	0.844	2.2803175555494e-10	2	HEP0	Agt
9130016M20Rik1	4.46571859001983e-06	0.527835	0.331	0.238	0.0706879	2	HEP0	9130016M20Rik
Sardh1	3.26564375252327e-13	0.527322	0.887	0.807	5.16918749586908e-09	2	HEP0	Sardh
Hyou12	2.13409392565066e-05	0.527029	0.256	0.177	0.337806	2	HEP0	Hyou1
Epb411	0.000944289	0.524143	0.275	0.213	1	2	HEP0	Epb41
Phyh1	4.44743067283601e-32	0.522465	1	0.935	7.03983801203212e-28	2	HEP0	Phyh
Arhgef121	5.56232469953006e-06	0.522279	0.413	0.32	0.088046	2	HEP0	Arhgef12
Creld1	3.11164378951784e-05	0.521698	0.361	0.275	0.492542	2	HEP0	Creld1
Hsd11b11	1.33409052660527e-14	0.521334	0.906	0.87	2.11173189456348e-10	2	HEP0	Hsd11b1
Ang1	1.20528582525066e-05	0.520795	0.824	0.955	0.190785	2	HEP0	Ang
Smim10l11	2.06783489041389e-11	0.520473	0.528	0.377	3.27317584803614e-07	2	HEP0	Smim10l1
Slc35e2	3.87474761985065e-05	0.520233	0.275	0.196	0.613334	2	HEP0	Slc35e2
Cyp2c231	1.68837537804092e-15	0.519814	0.744	0.579	2.67252938590097e-11	2	HEP0	Cyp2c23
Baat1	1.05946235779365e-09	0.519528	0.755	0.685	1.67702296615157e-05	2	HEP0	Baat
Prox11	5.03799191571049e-05	0.519371	0.262	0.184	0.797464	2	HEP0	Prox1
Nr1i2	2.95883606135632e-05	0.517993	0.306	0.224	0.468354	2	HEP0	Nr1i2
Macrod11	0.000410631	0.51761	0.308	0.241	1	2	HEP0	Macrod1
Dnaja31	0.000575434	0.516415	0.398	0.34	1	2	HEP0	Dnaja3
Afm1	4.15519046383597e-07	0.515913	0.688	0.643	0.00657725	2	HEP0	Afm
Slco1b21	1.13038255259558e-23	0.515624	0.922	0.808	1.78928254250354e-19	2	HEP0	Slco1b2
Acadsb1	2.29594754599307e-06	0.514396	0.491	0.404	0.0363426	2	HEP0	Acadsb
Gstt3	5.70487976724004e-06	0.513207	0.373	0.28	0.0903025	2	HEP0	Gstt3
Hc1	1.67717745864334e-14	0.513153	0.868	0.832	2.65480419928654e-10	2	HEP0	Hc
Arl4a2	2.09135479459812e-05	0.513082	0.331	0.245	0.331041	2	HEP0	Arl4a
Prkar2a1	6.5744860309427e-05	0.511584	0.302	0.225	1	2	HEP0	Prkar2a
Tat1	5.2095210506628e-14	0.510064	0.983	0.884	8.24615087109415e-10	2	HEP0	Tat
mt-Cytb2	1.94677200279005e-32	0.509617	1	0.978	3.08154540321637e-28	2	HEP0	mt-Cytb
Cd1d11	5.58631031436986e-12	0.509575	0.795	0.741	8.84257059661604e-08	2	HEP0	Cd1d1
Abcb61	9.04269172519584e-05	0.508448	0.321	0.247	1	2	HEP0	Abcb6
Serpina1c1	1.27554260924057e-24	0.508365	1	0.989	2.0190563961669e-20	2	HEP0	Serpina1c
Rora1	0.000298467	0.506575	0.254	0.186	1	2	HEP0	Rora
Tmem30b1	6.85700167349142e-06	0.504065	0.258	0.172	0.108539	2	HEP0	Tmem30b
Decr11	5.30576071386385e-12	0.502606	0.723	0.605	8.39848863397509e-08	2	HEP0	Decr1
C4b1	9.67317028249253e-09	0.502473	0.874	0.96	0.000153117	2	HEP0	C4b
Ptprd1	2.60651941422928e-06	0.498502	0.323	0.226	0.0412586	2	HEP0	Ptprd
Apol7a1	9.4054718850581e-06	0.498339	0.438	0.349	0.148879	2	HEP0	Apol7a
Pxdc11	5.93888260676784e-08	0.497271	0.509	0.39	0.000940066	2	HEP0	Pxdc1
Nat8f21	8.76336184775736e-08	0.497066	0.881	0.868	0.00138715	2	HEP0	Nat8f2
Acat11	3.54522944068118e-15	0.496441	0.824	0.724	5.61174368165423e-11	2	HEP0	Acat1
Lmf11	0.000325948	0.495392	0.287	0.221	1	2	HEP0	Lmf1
Cpt2	1.31879339142778e-05	0.494277	0.639	0.611	0.208752	2	HEP0	Cpt2
Slc1a21	7.00579564907674e-08	0.494014	0.291	0.188	0.00110895	2	HEP0	Slc1a2
Hint31	4.84158546954101e-06	0.493703	0.465	0.374	0.0766375	2	HEP0	Hint3
Bche1	0.000135344	0.493476	0.321	0.247	1	2	HEP0	Bche
Dmgdh1	6.00557667062126e-11	0.490834	0.744	0.653	9.50622731192639e-07	2	HEP0	Dmgdh
Aspg1	1.79545462010797e-08	0.490777	0.65	0.579	0.000284203	2	HEP0	Aspg
Cyp4v31	3.94463026056283e-15	0.489658	0.811	0.732	6.2439552394449e-11	2	HEP0	Cyp4v3
Wrnip1	0.000721089	0.48943	0.308	0.245	1	2	HEP0	Wrnip1
Acsm51	4.65652880017784e-05	0.488908	0.333	0.251	0.737082	2	HEP0	Acsm5
Mal21	0.000299936	0.48629	0.26	0.191	1	2	HEP0	Mal2
Tmem2431	0.000181171	0.485837	0.277	0.204	1	2	HEP0	Tmem243
Sec24d3	0.00486911	0.485644	0.363	0.311	1	2	HEP0	Sec24d
Ormdl31	4.81542128314115e-06	0.484827	0.432	0.337	0.0762233	2	HEP0	Ormdl3
C8b1	7.4476881288612e-10	0.484078	0.769	0.687	1.17889455391744e-05	2	HEP0	C8b
1300017J02Rik1	1.13924839261417e-11	0.483645	0.832	0.789	1.80331628066896e-07	2	HEP0	1300017J02Rik
Pcsk91	8.91820184849104e-06	0.483601	0.465	0.392	0.141166	2	HEP0	Pcsk9
Cfi1	8.73717071771459e-14	0.482979	0.881	0.841	1.38300675290704e-09	2	HEP0	Cfi
Sirt31	3.92371777029368e-07	0.480541	0.524	0.422	0.00621085	2	HEP0	Sirt3
Pdk21	5.32102241463339e-05	0.480534	0.325	0.243	0.842265	2	HEP0	Pdk2
Adhfe11	9.03364388315247e-06	0.48042	0.537	0.475	0.142994	2	HEP0	Adhfe1
Ephx21	9.61276030369934e-19	0.480416	0.918	0.813	1.52160382847257e-14	2	HEP0	Ephx2
Anks4b1	0.000460814	0.479182	0.281	0.215	1	2	HEP0	Anks4b
Hhex1	4.56092875721684e-06	0.476405	0.503	0.412	0.0721949	2	HEP0	Hhex
Sdr42e1	7.68180113821397e-05	0.475696	0.388	0.312	1	2	HEP0	Sdr42e1
C8a1	8.62361336757676e-11	0.475638	0.826	0.739	1.36503175995373e-06	2	HEP0	C8a
Synj2bp2	6.00934432340153e-08	0.473281	0.444	0.32	0.000951219	2	HEP0	Synj2bp
Haao1	1.22055070711544e-09	0.473132	0.843	0.809	1.93200971429303e-05	2	HEP0	Haao
Wfdc211	2.71167682908897e-11	0.472188	1	0.998	4.29231325276492e-07	2	HEP0	Wfdc21
Cmah1	1.56811573525156e-05	0.471238	0.344	0.255	0.248217	2	HEP0	Cmah
H6pd1	0.000441948	0.470853	0.7	0.713	1	2	HEP0	H6pd
Txnrd21	1.12374090798483e-05	0.470701	0.361	0.268	0.177877	2	HEP0	Txnrd2
Gjb21	3.01239529486798e-08	0.47046	0.751	0.675	0.000476832	2	HEP0	Gjb2
Maob1	2.4693956051853e-08	0.469806	0.579	0.464	0.000390881	2	HEP0	Maob
Aldh6a11	3.95269895617032e-12	0.469065	0.751	0.629	6.256727177722e-08	2	HEP0	Aldh6a1
Ech11	1.97777298941048e-12	0.468276	0.851	0.796	3.13061686493785e-08	2	HEP0	Ech1
Hnf4a1	3.56459775789654e-07	0.468243	0.751	0.684	0.0056424	2	HEP0	Hnf4a
Mpp62	1.13104965918004e-07	0.466351	0.426	0.306	0.00179034	2	HEP0	Mpp6
Acadvl1	2.12570689629399e-10	0.465721	0.824	0.776	3.36478144614375e-06	2	HEP0	Acadvl
Bet11	3.13344198846092e-06	0.461499	0.61	0.54	0.0495993	2	HEP0	Bet1
Hadh1	1.35147486473983e-08	0.460428	0.727	0.679	0.000213925	2	HEP0	Hadh
Pccb1	6.5790610638394e-05	0.459648	0.629	0.61	1	2	HEP0	Pccb
Crls11	0.000998197	0.458744	0.317	0.253	1	2	HEP0	Crls1
Il1r13	0.00668367	0.458706	0.39	0.344	1	2	HEP0	Il1r1
Cyp2e11	1.28584880959314e-19	0.457324	0.954	0.885	2.03537008070499e-15	2	HEP0	Cyp2e1
Tfpi22	5.53068279367468e-07	0.457094	0.436	0.324	0.00875452	2	HEP0	Tfpi2
Pxmp41	4.848325969303e-05	0.456643	0.587	0.543	0.767442	2	HEP0	Pxmp4
Acsm11	1.73575862824846e-08	0.454615	0.807	0.788	0.000274753	2	HEP0	Acsm1
Pnpla81	6.76397588171125e-08	0.453977	0.493	0.378	0.00107067	2	HEP0	Pnpla8
Ptges21	0.00111561	0.453796	0.317	0.251	1	2	HEP0	Ptges2
Eps8l21	0.000101937	0.45256	0.361	0.282	1	2	HEP0	Eps8l2
Wwc1	0.00010037	0.452194	0.252	0.177	1	2	HEP0	Wwc1
Slc25a201	6.61232010093523e-05	0.451832	0.358	0.278	1	2	HEP0	Slc25a20
Optn1	0.00339215	0.451269	0.3	0.248	1	2	HEP0	Optn
Mecr1	0.00228902	0.451218	0.264	0.209	1	2	HEP0	Mecr
Pdcd41	1.31226903180129e-05	0.450769	0.476	0.392	0.207719	2	HEP0	Pdcd4
Net11	0.000840602	0.450604	0.321	0.257	1	2	HEP0	Net1
Erbb31	0.000140989	0.450397	0.352	0.276	1	2	HEP0	Erbb3
Bckdha1	1.1856108327918e-10	0.450365	0.782	0.713	1.87670338722615e-06	2	HEP0	Bckdha
Pex11g1	0.000870606	0.448324	0.327	0.262	1	2	HEP0	Pex11g
Slc35d21	0.000879352	0.447695	0.298	0.234	1	2	HEP0	Slc35d2
AI1823711	1.22572443614577e-11	0.447143	0.843	0.762	1.94019920997514e-07	2	HEP0	AI182371
Esrp21	0.000219215	0.446576	0.335	0.26	1	2	HEP0	Esrp2
Prodh2	1.3105655828258e-06	0.444963	0.656	0.607	0.0207449	2	HEP0	Prodh2
Ptprk1	0.00464001	0.444052	0.302	0.248	1	2	HEP0	Ptprk
Uso13	0.00357482	0.443751	0.375	0.318	1	2	HEP0	Uso1
Atp11c1	5.03367158541497e-07	0.443345	0.503	0.398	0.0079678	2	HEP0	Atp11c
Dnajc31	3.84800498658126e-05	0.443137	0.73	0.72	0.609101	2	HEP0	Dnajc3
Eci11	8.68576899817678e-09	0.439999	0.673	0.576	0.000137487	2	HEP0	Eci1
Klkb11	8.72099619093438e-08	0.439477	0.658	0.586	0.00138045	2	HEP0	Klkb1
Otc1	3.32432209131432e-20	0.438949	0.897	0.774	5.26206943834143e-16	2	HEP0	Otc
Rmdn31	0.00032909	0.43869	0.417	0.355	1	2	HEP0	Rmdn3
Chchd101	4.73635107475154e-27	0.438534	0.998	0.924	7.49717011622421e-23	2	HEP0	Chchd10
Lcn22	1.37718219703144e-05	0.43848	0.648	0.963	0.217994	2	HEP0	Lcn2
Suclg21	3.99106476696624e-10	0.438111	0.771	0.695	6.31745641963085e-06	2	HEP0	Suclg2
Crb31	0.000197063	0.438041	0.262	0.192	1	2	HEP0	Crb3
Akap11	0.00123523	0.436013	0.363	0.3	1	2	HEP0	Akap1
Hsdl21	1.71205752063496e-05	0.435969	0.382	0.293	0.271002	2	HEP0	Hsdl2
Dpyd1	7.6644878154056e-13	0.435735	0.725	0.57	1.21321177630055e-08	2	HEP0	Dpyd
Sil11	0.0031742	0.435468	0.35	0.3	1	2	HEP0	Sil1
Slc4a41	0.00166565	0.434956	0.285	0.226	1	2	HEP0	Slc4a4
Smpd11	0.00155967	0.434913	0.403	0.345	1	2	HEP0	Smpd1
Apoc11	4.90766429924455e-34	0.434795	1	0.997	7.7683418192742e-30	2	HEP0	Apoc1
Dhdh1	1.12555483329165e-05	0.434202	0.371	0.28	0.178164	2	HEP0	Dhdh
Cyp2d101	3.21777250191036e-17	0.433811	0.95	0.841	5.09341209327391e-13	2	HEP0	Cyp2d10
Masp21	3.7148327854946e-09	0.433331	0.769	0.71	5.8802088161594e-05	2	HEP0	Masp2
Tle11	2.19717652074748e-05	0.433254	0.329	0.238	0.347791	2	HEP0	Tle1
Igtp3	6.85832606829797e-06	0.432883	0.488	0.419	0.10856	2	HEP0	Igtp
Ugt2b51	1.88954366545679e-32	0.431928	0.969	0.816	2.99095866805155e-28	2	HEP0	Ugt2b5
Fabp2	2.07080632107016e-09	0.43055	0.583	0.444	3.27787932562196e-05	2	HEP0	Fabp2
Aifm11	0.000367913	0.429231	0.436	0.368	1	2	HEP0	Aifm1
F13b1	4.03132578787113e-07	0.429208	0.539	0.422	0.00638119	2	HEP0	F13b
Kyat11	1.9072691775259e-06	0.429054	0.556	0.476	0.0301902	2	HEP0	Kyat1
Azgp11	1.13496840628871e-17	0.424889	0.992	0.942	1.7965414903144e-13	2	HEP0	Azgp1
Ces3b	5.39390981733726e-12	0.424535	0.755	0.636	8.53801984986314e-08	2	HEP0	Ces3b
Arhgap351	0.00111751	0.423793	0.252	0.19	1	2	HEP0	Arhgap35
Apoa51	0.000158553	0.422882	0.981	0.925	1	2	HEP0	Apoa5
Gpt21	0.00118805	0.421796	0.755	0.713	1	2	HEP0	Gpt2
Mrps18b1	0.00833311	0.420104	0.398	0.354	1	2	HEP0	Mrps18b
Sec24a1	8.06818989382645e-06	0.419261	0.403	0.301	0.127711	2	HEP0	Sec24a
Larp1b1	0.000130501	0.419261	0.386	0.302	1	2	HEP0	Larp1b
Wwp11	0.000772894	0.419189	0.304	0.235	1	2	HEP0	Wwp1
Glo11	3.13771152050662e-16	0.418845	0.941	0.86	4.96668356580992e-12	2	HEP0	Glo1
Lsr1	2.88512192221357e-05	0.418483	0.723	0.707	0.456686	2	HEP0	Lsr
Srr1	0.000177782	0.417551	0.323	0.246	1	2	HEP0	Srr
Mtss11	0.00195203	0.417532	0.394	0.336	1	2	HEP0	Mtss1
March81	2.42953851588924e-06	0.417495	0.354	0.25	0.0384572	2	HEP0	March8
Chac2	0.00474439	0.416466	0.287	0.232	1	2	HEP0	Chac2
Cyp2c68	6.07425487665187e-07	0.414079	0.665	0.591	0.00961494	2	HEP0	Cyp2c68
Rdh16f21	2.17414844131884e-05	0.412264	0.669	0.637	0.344146	2	HEP0	Rdh16f2
Mlxipl	2.05652904353402e-06	0.412251	0.56	0.469	0.0325528	2	HEP0	Mlxipl
Serpina61	0.000454767	0.410982	0.57	0.522	1	2	HEP0	Serpina6
Aldob1	5.50064261072509e-21	0.410097	1	0.953	8.70696718851675e-17	2	HEP0	Aldob
Sod11	2.36645134852727e-17	0.408779	0.985	0.927	3.74585583958381e-13	2	HEP0	Sod1
Ttc321	0.00278713	0.408615	0.314	0.258	1	2	HEP0	Ttc32
Rida	3.63649624119387e-23	0.407259	0.983	0.893	5.75620990018577e-19	2	HEP0	Rida
B630019A10Rik1	0.000626761	0.406786	0.405	0.342	1	2	HEP0	B630019A10Rik
Sdf2l12	0.00433133	0.406112	0.348	0.289	1	2	HEP0	Sdf2l1
Pgrmc11	2.30126904943674e-20	0.405676	0.979	0.915	3.64267877835342e-16	2	HEP0	Pgrmc1
Nr5a21	0.000301092	0.404808	0.317	0.243	1	2	HEP0	Nr5a2
Cyp511	2.51379436614689e-05	0.404602	0.654	0.607	0.397909	2	HEP0	Cyp51
Serpinc11	2.07333879939689e-17	0.403368	1	0.952	3.28188798556533e-13	2	HEP0	Serpinc1
Pja12	1.50009918746427e-05	0.403274	0.371	0.276	0.237451	2	HEP0	Pja1
Pla2g12b1	0.000410069	0.403033	0.602	0.586	1	2	HEP0	Pla2g12b
Fermt22	8.33404519092868e-06	0.402558	0.474	0.378	0.13192	2	HEP0	Fermt2
Osbpl1a1	3.00923754462941e-05	0.402328	0.411	0.322	0.476332	2	HEP0	Osbpl1a
Acot121	8.15749790347849e-05	0.400483	0.352	0.267	1	2	HEP0	Acot12
Hspb81	0.000105775	0.400337	0.635	0.603	1	2	HEP0	Hspb8
Acaa21	2.16828014939452e-15	0.399322	0.964	0.864	3.43217064847659e-11	2	HEP0	Acaa2
Efna11	1.91115851659832e-05	0.399125	0.57	0.517	0.302517	2	HEP0	Efna1
Crot1	7.88532531534711e-14	0.398956	0.916	0.821	1.24816814416629e-09	2	HEP0	Crot
Sqle1	0.00488171	0.398335	0.484	0.45	1	2	HEP0	Sqle
Etfdh1	3.3014778710933e-07	0.397826	0.671	0.592	0.00522591	2	HEP0	Etfdh
C1rl1	0.000325715	0.396683	0.449	0.374	1	2	HEP0	C1rl
Asgr11	4.96717941584567e-12	0.396331	0.901	0.862	7.86254829734211e-08	2	HEP0	Asgr1
Rcl11	2.07525046506604e-06	0.395289	0.757	0.705	0.0328491	2	HEP0	Rcl1
Acsl11	3.02679641666496e-15	0.394203	0.897	0.773	4.79111604793896e-11	2	HEP0	Acsl1
Adk1	1.71292459011068e-13	0.393833	0.935	0.853	2.7113883336862e-09	2	HEP0	Adk
Lgr41	0.0072853	0.392675	0.252	0.2	1	2	HEP0	Lgr4
Mup10	0.000105225	0.392096	0.377	0.292	1	2	HEP0	Mup10
Xiap2	0.00124599	0.390523	0.333	0.269	1	2	HEP0	Xiap
D130020L05Rik1	0.00649467	0.38904	0.287	0.235	1	2	HEP0	D130020L05Rik
Slc35a31	0.000563068	0.388635	0.308	0.237	1	2	HEP0	Slc35a3
Hpn1	4.49894633114463e-09	0.388196	0.843	0.815	7.12138214756883e-05	2	HEP0	Hpn
Sel1l1	6.12170582462402e-05	0.387347	0.518	0.442	0.969005	2	HEP0	Sel1l
Cpn11	0.000134763	0.386449	0.715	0.675	1	2	HEP0	Cpn1
Bfar1	0.00225817	0.386326	0.283	0.222	1	2	HEP0	Bfar
Acad111	9.06076027178003e-09	0.386286	0.679	0.567	0.000143423	2	HEP0	Acad11
Tmem106b1	7.5318931596744e-05	0.384952	0.514	0.448	1	2	HEP0	Tmem106b
Dgcr61	0.000107047	0.383768	0.505	0.435	1	2	HEP0	Dgcr6
Aspdh1	4.43290520630551e-07	0.383627	0.673	0.606	0.00701685	2	HEP0	Aspdh
Nadk21	1.9974578312457e-06	0.382014	0.476	0.363	0.0316178	2	HEP0	Nadk2
Mccc2	0.00203121	0.380933	0.325	0.262	1	2	HEP0	Mccc2
Ces1c1	2.84918198571903e-15	0.380175	0.998	0.95	4.50997016519465e-11	2	HEP0	Ces1c
Dgat22	1.11258333220547e-05	0.380045	0.857	0.904	0.176111	2	HEP0	Dgat2
Gstt11	2.34103085540912e-05	0.378462	0.761	0.763	0.370562	2	HEP0	Gstt1
Cyp3a111	3.76235052552189e-35	0.378251	1	0.938	5.95542464684859e-31	2	HEP0	Cyp3a11
Gk2	0.00022345	0.377522	0.367	0.286	1	2	HEP0	Gk
Dnajb21	0.000188722	0.376239	0.354	0.274	1	2	HEP0	Dnajb2
Enpp31	0.000994019	0.375722	0.3	0.235	1	2	HEP0	Enpp3
Adipor21	1.5990230823235e-06	0.375042	0.748	0.732	0.0253109	2	HEP0	Adipor2
Dld1	4.32154194028646e-05	0.374118	0.52	0.44	0.684057	2	HEP0	Dld
Pank11	4.36479433991505e-09	0.373582	0.667	0.54	6.90903296065153e-05	2	HEP0	Pank1
F71	0.00649885	0.373281	0.621	0.651	1	2	HEP0	F7
Nr1d21	0.00183389	0.372782	0.256	0.194	1	2	HEP0	Nr1d2
Acaa1a1	0.000250109	0.372693	0.788	0.805	1	2	HEP0	Acaa1a
Paqr91	1.94296016454839e-06	0.37213	0.725	0.666	0.0307551	2	HEP0	Paqr9
Ccdc1671	0.00373673	0.371915	0.346	0.297	1	2	HEP0	Ccdc167
Aldh1a11	3.37224568117448e-19	0.370622	0.973	0.898	5.33792768873108e-15	2	HEP0	Aldh1a1
C130074G19Rik1	0.000280312	0.370385	0.39	0.311	1	2	HEP0	C130074G19Rik
Ndufa91	0.000196449	0.370223	0.623	0.576	1	2	HEP0	Ndufa9
Nlrp61	0.000225877	0.370033	0.415	0.332	1	2	HEP0	Nlrp6
Proz1	3.08825251945831e-07	0.369632	0.778	0.739	0.0048884	2	HEP0	Proz
Adtrp1	7.47704140873229e-05	0.368947	0.662	0.619	1	2	HEP0	Adtrp
Mocs11	0.00678688	0.368177	0.363	0.308	1	2	HEP0	Mocs1
Vkorc1l11	0.00364676	0.368049	0.266	0.209	1	2	HEP0	Vkorc1l1
Pex61	0.00534066	0.367812	0.47	0.435	1	2	HEP0	Pex6
Rbm47	0.00338185	0.367287	0.264	0.208	1	2	HEP0	Rbm47
Bphl1	2.75925138393482e-05	0.365385	0.719	0.672	0.436762	2	HEP0	Bphl
Camk2n11	0.00167029	0.364447	0.329	0.264	1	2	HEP0	Camk2n1
Urah1	6.92411036864767e-10	0.362661	0.952	0.915	1.09601743025324e-05	2	HEP0	Urah
C2cd21	0.00325753	0.361708	0.43	0.382	1	2	HEP0	C2cd2
Tspan121	0.000488196	0.361695	0.501	0.438	1	2	HEP0	Tspan12
Rxra1	0.00108362	0.360862	0.681	0.677	1	2	HEP0	Rxra
Cyp4f131	0.000823539	0.360667	0.331	0.263	1	2	HEP0	Cyp4f13
Grpel21	0.00627335	0.360232	0.279	0.226	1	2	HEP0	Grpel2
Igfbp41	9.38057732398275e-07	0.35805	0.975	0.9	0.0148485	2	HEP0	Igfbp4
Ctso1	0.00869492	0.357316	0.331	0.284	1	2	HEP0	Ctso
Gstp31	0.00960199	0.355214	0.262	0.214	1	2	HEP0	Gstp3
Sord1	3.81351659217595e-15	0.353793	0.971	0.849	6.03641541375531e-11	2	HEP0	Sord
Akr1c121	0.000200703	0.352453	0.333	0.253	1	2	HEP0	Akr1c12
Pex71	0.000401859	0.352375	0.453	0.376	1	2	HEP0	Pex7
Sec16b1	0.00263579	0.352164	0.346	0.287	1	2	HEP0	Sec16b
Slco2b11	0.000157588	0.351615	0.423	0.341	1	2	HEP0	Slco2b1
Svip1	0.00304671	0.351138	0.252	0.194	1	2	HEP0	Svip
Man1a3	0.000154627	0.350071	0.65	0.599	1	2	HEP0	Man1a
Cat1	5.00594387921056e-21	0.34946	1	0.956	7.9239085664024e-17	2	HEP0	Cat
Nek72	0.00600905	0.348287	0.277	0.221	1	2	HEP0	Nek7
Pls32	0.00675977	0.348011	0.371	0.319	1	2	HEP0	Pls3
Ikbkg1	0.00326307	0.347656	0.314	0.253	1	2	HEP0	Ikbkg
Ndrg21	9.23120358011325e-10	0.347376	0.962	0.908	1.46120721469613e-05	2	HEP0	Ndrg2
Ivd	1.23700612972756e-06	0.346563	0.694	0.628	0.0195806	2	HEP0	Ivd
Lipc	7.38985301838997e-07	0.344906	0.654	0.534	0.0116974	2	HEP0	Lipc
Nfib2	0.00457406	0.344713	0.331	0.273	1	2	HEP0	Nfib
Acads1	3.2413287948316e-05	0.343939	0.736	0.717	0.51307	2	HEP0	Acads
Fxyd11	7.52092567864606e-12	0.343921	0.895	0.8	1.19048732567289e-07	2	HEP0	Fxyd1
Aldh1l11	3.6874288416594e-10	0.343545	0.954	0.915	5.83683111346267e-06	2	HEP0	Aldh1l1
Tmem2051	2.9367529547289e-12	0.343377	0.973	0.916	4.64858625204038e-08	2	HEP0	Tmem205
Cyp2j61	0.00134093	0.341859	0.344	0.278	1	2	HEP0	Cyp2j6
Mcur11	0.0082997	0.341586	0.266	0.214	1	2	HEP0	Mcur1
C91	1.17782820812044e-10	0.340963	0.834	0.716	1.86438427063385e-06	2	HEP0	C9
Acat31	5.3989786338919e-07	0.340761	0.816	0.767	0.00854604	2	HEP0	Acat3
C4bp1	0.000688644	0.340203	0.925	0.888	1	2	HEP0	C4bp
Crat1	0.00216968	0.339974	0.327	0.262	1	2	HEP0	Crat
Tgoln12	0.000166705	0.339851	0.616	0.587	1	2	HEP0	Tgoln1
Gys21	0.000232081	0.337592	0.354	0.272	1	2	HEP0	Gys2
Grhpr1	0.00348046	0.337477	0.843	0.792	1	2	HEP0	Grhpr
Acad81	0.00162376	0.337231	0.442	0.384	1	2	HEP0	Acad8
Il1rap1	0.000126043	0.336552	0.526	0.443	1	2	HEP0	Il1rap
Asl1	1.79022364566371e-05	0.336254	0.849	0.806	0.283375	2	HEP0	Asl
Kng11	2.70478007263526e-12	0.336154	0.992	0.959	4.28139637697436e-08	2	HEP0	Kng1
Hmgcr1	0.000137037	0.336036	0.396	0.314	1	2	HEP0	Hmgcr
Nr1h41	0.000106464	0.335875	0.53	0.457	1	2	HEP0	Nr1h4
Sdc21	4.43123617733368e-05	0.335368	0.644	0.595	0.70142	2	HEP0	Sdc2
Fam210a1	0.00743212	0.335279	0.296	0.242	1	2	HEP0	Fam210a
Kyat31	5.61069206934716e-06	0.33508	0.738	0.696	0.0888116	2	HEP0	Kyat3
Nfe2l12	0.00674568	0.3346	0.426	0.379	1	2	HEP0	Nfe2l1
Mmut	0.00144577	0.334275	0.514	0.455	1	2	HEP0	Mmut
Bbox11	8.96148615871527e-05	0.333916	0.495	0.406	1	2	HEP0	Bbox1
Dpys	6.66221464310006e-05	0.33303	0.654	0.598	1	2	HEP0	Dpys
F121	5.38843381624333e-05	0.332654	0.805	0.773	0.852935	2	HEP0	F12
Nectin11	0.00451129	0.331506	0.283	0.226	1	2	HEP0	Nectin1
Sdc41	3.32958007261477e-05	0.330918	0.807	0.777	0.527039	2	HEP0	Sdc4
Etfa1	1.01801619568047e-11	0.32906	0.889	0.781	1.61141783614262e-07	2	HEP0	Etfa
Mlycd1	0.00852595	0.329028	0.468	0.424	1	2	HEP0	Mlycd
Etfrf11	0.00306195	0.327935	0.304	0.245	1	2	HEP0	Etfrf1
Asb131	0.00528514	0.327459	0.298	0.241	1	2	HEP0	Asb13
Sdha1	2.81037249941454e-07	0.327173	0.834	0.802	0.00444854	2	HEP0	Sdha
Faah1	0.00504271	0.326881	0.417	0.367	1	2	HEP0	Faah
Afmid	0.00195296	0.325623	0.403	0.342	1	2	HEP0	Afmid
Slc10a11	2.447346501071e-15	0.324289	0.891	0.707	3.87390477654529e-11	2	HEP0	Slc10a1
Sco21	0.00099936	0.32428	0.403	0.329	1	2	HEP0	Sco2
Pon31	0.00566854	0.32406	0.296	0.241	1	2	HEP0	Pon3
Proc1	2.23965664576132e-06	0.323719	0.847	0.793	0.0354515	2	HEP0	Proc
Hadhb1	1.27753870674109e-05	0.32255	0.696	0.638	0.202222	2	HEP0	Hadhb
Gatd3a1	0.000934777	0.321385	0.633	0.619	1	2	HEP0	Gatd3a
Fam214a	0.00295753	0.321243	0.268	0.208	1	2	HEP0	Fam214a
Slc37a41	0.00189412	0.320998	0.577	0.55	1	2	HEP0	Slc37a4
Pecr1	3.02534795322164e-05	0.320894	0.717	0.698	0.478882	2	HEP0	Pecr
Ak31	7.24757634439517e-06	0.31977	0.706	0.633	0.114722	2	HEP0	Ak3
R3hdm22	0.00192115	0.319438	0.281	0.217	1	2	HEP0	R3hdm2
1110065P20Rik1	0.00685926	0.318948	0.434	0.388	1	2	HEP0	1110065P20Rik
Acsf21	0.00220399	0.31796	0.254	0.192	1	2	HEP0	Acsf2
Ly6g21	0.00491961	0.317423	0.358	0.3	1	2	HEP0	Ly6g2
Fpgs1	0.00147819	0.31741	0.553	0.501	1	2	HEP0	Fpgs
Bst22	0.000425668	0.316535	0.851	0.967	1	2	HEP0	Bst2
Gm56171	0.000459141	0.314693	0.407	0.329	1	2	HEP0	Gm5617
F91	0.000304694	0.314626	0.606	0.562	1	2	HEP0	F9
Nudt71	3.07291985404706e-11	0.312904	0.866	0.744	4.86412483697109e-07	2	HEP0	Nudt7
Serpina1b1	8.33212425801688e-14	0.310742	1	0.986	1.31889194880149e-09	2	HEP0	Serpina1b
Hsd17b121	0.00192043	0.309614	0.686	0.684	1	2	HEP0	Hsd17b12
Eva1a1	0.000190807	0.309354	0.514	0.436	1	2	HEP0	Eva1a
Chchd31	0.000196676	0.307019	0.562	0.503	1	2	HEP0	Chchd3
Pipox1	3.32454758846742e-07	0.306393	0.763	0.678	0.00526243	2	HEP0	Pipox
Acadm1	2.8059725367062e-08	0.306309	0.799	0.721	0.000444157	2	HEP0	Acadm
Smlr11	0.000634219	0.306293	0.585	0.554	1	2	HEP0	Smlr1
Hadha1	1.43395035828357e-05	0.305957	0.755	0.734	0.22698	2	HEP0	Hadha
Tm7sf21	4.74328238820738e-05	0.305441	0.524	0.423	0.750814	2	HEP0	Tm7sf2
Rgn1	2.16698971645754e-07	0.305181	0.883	0.879	0.00343013	2	HEP0	Rgn
Mgst11	1.09766723062184e-18	0.304374	1	0.999	1.73749745935131e-14	2	HEP0	Mgst1
Psme41	0.00600616	0.304282	0.358	0.303	1	2	HEP0	Psme4
Hspa91	3.31746172803527e-06	0.303827	0.872	0.839	0.0525121	2	HEP0	Hspa9
Glul1	0.000873516	0.30356	0.654	0.629	1	2	HEP0	Glul
Pex191	0.00222015	0.302747	0.442	0.376	1	2	HEP0	Pex19
Agxt21	0.00252291	0.302747	0.532	0.489	1	2	HEP0	Agxt2
Slc25a131	2.3520779690961e-05	0.30228	0.507	0.417	0.37231	2	HEP0	Slc25a13
Igf11	1.81254552818457e-09	0.302151	0.95	0.901	2.86907831656336e-05	2	HEP0	Igf1
Echdc11	0.0021764	0.301935	0.35	0.282	1	2	HEP0	Echdc1
Tex21	0.00923804	0.301293	0.367	0.315	1	2	HEP0	Tex2
Pcyt21	6.03364972652804e-07	0.300192	0.864	0.832	0.00955066	2	HEP0	Pcyt2
Dnajc222	0.0091902	0.300135	0.314	0.262	1	2	HEP0	Dnajc22
Fggy1	0.00662626	0.300051	0.501	0.46	1	2	HEP0	Fggy
Mia21	0.000546841	0.298754	0.56	0.509	1	2	HEP0	Mia2
Endog1	0.000608264	0.298745	0.447	0.372	1	2	HEP0	Endog
Amdhd1	6.05804733491529e-05	0.298173	0.667	0.607	0.958928	2	HEP0	Amdhd1
Apmap1	0.00690707	0.298106	0.31	0.256	1	2	HEP0	Apmap
Tmprss61	4.23466724038963e-05	0.297422	0.757	0.739	0.670305	2	HEP0	Tmprss6
Vkorc11	4.90141560859905e-05	0.296844	0.857	0.889	0.775845	2	HEP0	Vkorc1
Habp21	0.00337472	0.295865	0.639	0.642	1	2	HEP0	Habp2
Hibch1	0.00346291	0.295857	0.367	0.3	1	2	HEP0	Hibch
Ahsa21	0.00825957	0.295692	0.323	0.267	1	2	HEP0	Ahsa2
Cd3021	4.01105668957402e-05	0.295537	0.899	0.968	0.63491	2	HEP0	Cd302
Slc23a11	0.00448676	0.294007	0.252	0.195	1	2	HEP0	Slc23a1
Apoc31	6.55771380773002e-15	0.293835	1	0.988	1.03802051862558e-10	2	HEP0	Apoc3
Hint21	2.14758583332652e-05	0.293032	0.803	0.751	0.339941	2	HEP0	Hint2
Cyp2d221	6.14639324356224e-06	0.292955	0.656	0.557	0.0972913	2	HEP0	Cyp2d22
Uox1	6.47726072057284e-24	0.292113	0.992	0.898	1.02528559945948e-19	2	HEP0	Uox
Apom1	8.36988131939954e-09	0.289523	0.91	0.862	0.000132487	2	HEP0	Apom
Letm11	0.00896923	0.28889	0.39	0.34	1	2	HEP0	Letm1
Aldh21	5.67758299437544e-06	0.288589	0.994	0.974	0.0898705	2	HEP0	Aldh2
Hal	3.69954084969791e-07	0.287035	0.715	0.627	0.005856	2	HEP0	Hal
Perp1	0.00132243	0.286922	0.478	0.413	1	2	HEP0	Perp
Fah1	1.0968436449825e-06	0.284744	0.92	0.884	0.0173619	2	HEP0	Fah
Gls21	0.000337844	0.284014	0.776	0.739	1	2	HEP0	Gls2
Aqp111	0.00314883	0.283953	0.256	0.196	1	2	HEP0	Aqp11
Ppm1a1	0.00396424	0.283829	0.442	0.387	1	2	HEP0	Ppm1a
Dhrs41	0.00181011	0.282453	0.696	0.682	1	2	HEP0	Dhrs4
Ttpa1	3.63937640288055e-07	0.282365	0.889	0.793	0.00576077	2	HEP0	Ttpa
Ccl25	4.49925586108153e-10	0.282136	0.507	0.39	7.12187210250595e-06	2	HEP0	Ccl2
Ebpl1	1.51546528496975e-06	0.281498	0.803	0.787	0.0239883	2	HEP0	Ebpl
Upb11	3.11596844052884e-07	0.281186	0.843	0.765	0.00493227	2	HEP0	Upb1
Acbd61	0.00725464	0.281119	0.363	0.305	1	2	HEP0	Acbd6
Hpd1	2.53408888572716e-09	0.28065	0.977	0.928	4.01120929721753e-05	2	HEP0	Hpd
Pbld11	0.000410763	0.28005	0.566	0.496	1	2	HEP0	Pbld1
Hibadh1	5.85538178312801e-08	0.278807	0.832	0.748	0.000926848	2	HEP0	Hibadh
Adh41	0.000105189	0.277473	0.403	0.314	1	2	HEP0	Adh4
Naprt1	0.00549348	0.276971	0.574	0.551	1	2	HEP0	Naprt
Timm91	0.00701419	0.27696	0.323	0.266	1	2	HEP0	Timm9
Atl21	0.00379048	0.276509	0.386	0.319	1	2	HEP0	Atl2
Reep61	2.27956218537808e-10	0.276409	0.912	0.816	3.60831898323496e-06	2	HEP0	Reep6
Gcat1	0.00150285	0.27626	0.539	0.481	1	2	HEP0	Gcat
Uroc11	0.000174494	0.275691	0.526	0.453	1	2	HEP0	Uroc1
Dsg21	0.00948646	0.275467	0.325	0.268	1	2	HEP0	Dsg2
Uqcrc11	0.00373103	0.274488	0.788	0.814	1	2	HEP0	Uqcrc1
Ndufa101	0.000959061	0.273661	0.698	0.674	1	2	HEP0	Ndufa10
Immp2l1	0.00485933	0.272661	0.377	0.315	1	2	HEP0	Immp2l
Tmem38b1	0.00497537	0.272579	0.505	0.468	1	2	HEP0	Tmem38b
Atxn7l3b1	0.00955449	0.272546	0.373	0.318	1	2	HEP0	Atxn7l3b
Rhou1	0.000944352	0.272012	0.549	0.489	1	2	HEP0	Rhou
Ndufs61	8.49556656816502e-06	0.270957	0.897	0.858	0.134476	2	HEP0	Ndufs6
Zfp912	0.00262111	0.270588	0.31	0.244	1	2	HEP0	Zfp91
0610005C13Rik1	1.45152462670202e-06	0.270135	0.782	0.735	0.0229762	2	HEP0	0610005C13Rik
Aco11	0.000264812	0.268117	0.669	0.604	1	2	HEP0	Aco1
Serpina122	9.65393203096991e-06	0.267841	0.505	0.407	0.152812	2	HEP0	Serpina12
Echdc21	0.00120129	0.266863	0.621	0.576	1	2	HEP0	Echdc2
Gne1	0.00555488	0.266064	0.614	0.599	1	2	HEP0	Gne
Gstz11	6.21560937230401e-10	0.265443	0.912	0.816	9.83868807542002e-06	2	HEP0	Gstz1
Igfbp11	0.000593	0.265081	0.648	0.652	1	2	HEP0	Igfbp1
Dnase1l32	0.00164494	0.265037	0.455	0.385	1	2	HEP0	Dnase1l3
Itih11	0.00137191	0.264958	0.847	0.874	1	2	HEP0	Itih1
Etfb1	2.49943165054549e-07	0.264299	0.933	0.883	0.00395635	2	HEP0	Etfb
Iyd1	0.00341513	0.26253	0.411	0.344	1	2	HEP0	Iyd
Marc11	6.38139270923551e-08	0.262441	0.887	0.803	0.00101011	2	HEP0	Marc1
Gchfr1	5.59706930735215e-10	0.261994	0.872	0.792	8.85960100660772e-06	2	HEP0	Gchfr
Ttr1	1.57889463595797e-19	0.260817	1	0.995	2.49923231925788e-15	2	HEP0	Ttr
Ugt2b361	1.13081281223209e-12	0.258408	0.916	0.779	1.78996360048217e-08	2	HEP0	Ugt2b36
Csnk2a12	0.00385456	0.257713	0.335	0.272	1	2	HEP0	Csnk2a1
Abcd31	9.05619768390831e-11	0.257164	0.826	0.717	1.43350553138585e-06	2	HEP0	Abcd3
Stard101	1.24066777344717e-08	0.254396	0.981	0.891	0.000196385	2	HEP0	Stard10
Gsta31	2.21755288799753e-18	0.25386	0.983	0.893	3.51016446641128e-14	2	HEP0	Gsta3
Cfh1	1.86801554146701e-06	0.253825	0.954	0.943	0.0295688	2	HEP0	Cfh
Akr7a51	4.07026027935776e-05	0.253079	0.732	0.675	0.644281	2	HEP0	Akr7a5
Asgr21	0.00304599	0.247605	0.612	0.579	1	2	HEP0	Asgr2
Ifitm33	0.00872532	0.245654	0.952	0.997	1	2	HEP0	Ifitm3
Akr1c191	0.000611249	0.245642	0.344	0.27	1	2	HEP0	Akr1c19
Mettl7b1	9.2830794290818e-11	0.245346	0.925	0.839	1.46941864282936e-06	2	HEP0	Mettl7b
Dbi1	1.0780096885853e-20	0.245095	1	0.993	1.70638153606167e-16	2	HEP0	Dbi
Ddrgk11	0.00713712	0.244775	0.679	0.676	1	2	HEP0	Ddrgk1
Anp32a2	0.0038376	0.24452	0.302	0.238	1	2	HEP0	Anp32a
Ebp1	2.91766810952639e-05	0.244079	0.786	0.746	0.461838	2	HEP0	Ebp
Dcaf111	0.000501222	0.242055	0.788	0.782	1	2	HEP0	Dcaf11
Aldh8a11	0.000131122	0.240927	0.79	0.746	1	2	HEP0	Aldh8a1
Mttp1	0.0001218	0.240915	0.587	0.503	1	2	HEP0	Mttp
Hsd17b131	3.55858814558085e-05	0.240688	0.795	0.731	0.563289	2	HEP0	Hsd17b13
Gspt12	0.00465727	0.239995	0.371	0.307	1	2	HEP0	Gspt1
Ndufv11	0.00147122	0.239842	0.683	0.666	1	2	HEP0	Ndufv1
Ces1g1	0.00299864	0.239617	0.688	0.658	1	2	HEP0	Ces1g
Sephs21	1.34504254373468e-09	0.239357	0.918	0.845	2.12906784247763e-05	2	HEP0	Sephs2
Slc25a14	0.00293691	0.238652	0.732	0.711	1	2	HEP0	Slc25a1
Pcbd11	1.13837073766202e-07	0.237442	0.914	0.899	0.00180193	2	HEP0	Pcbd1
Nat8f11	0.00443193	0.237058	0.83	0.802	1	2	HEP0	Nat8f1
Aldh1a71	1.09809540516053e-06	0.23679	0.73	0.683	0.0173818	2	HEP0	Aldh1a7
5033403H07Rik	0.00244595	0.23641	0.47	0.399	1	2	HEP0	5033403H07Rik
1810008I18Rik1	7.29117980288967e-12	0.236277	0.577	0.403	1.15412085099941e-07	2	HEP0	1810008I18Rik
F101	0.000191049	0.236209	0.843	0.877	1	2	HEP0	F10
Slc22a11	6.75509695985123e-08	0.235884	0.79	0.727	0.00106926	2	HEP0	Slc22a1
Gsto11	0.00775073	0.235879	0.589	0.565	1	2	HEP0	Gsto1
Angptl31	8.40464909793689e-10	0.234456	0.872	0.752	1.33037190571243e-05	2	HEP0	Angptl3
Lman11	0.00741141	0.234267	0.572	0.538	1	2	HEP0	Lman1
Gstk11	0.00105634	0.2316	0.706	0.684	1	2	HEP0	Gstk1
F51	4.08341623726044e-05	0.231365	0.713	0.658	0.646364	2	HEP0	F5
Scap1	0.00440103	0.231362	0.409	0.34	1	2	HEP0	Scap
Cyp4f141	0.00111502	0.231077	0.679	0.615	1	2	HEP0	Cyp4f14
Cideb1	5.86839641673048e-05	0.230453	0.748	0.687	0.928908	2	HEP0	Cideb
Lifr1	0.000931065	0.229668	0.683	0.634	1	2	HEP0	Lifr
Ndufb91	2.01797492068669e-07	0.225969	0.954	0.902	0.00319425	2	HEP0	Ndufb9
Ehhadh1	0.0007722	0.224625	0.639	0.595	1	2	HEP0	Ehhadh
Gcgr1	0.00137857	0.224248	0.744	0.742	1	2	HEP0	Gcgr
Cpn21	0.00158256	0.224143	0.681	0.635	1	2	HEP0	Cpn2
Slc25a391	0.000269213	0.223101	0.906	0.912	1	2	HEP0	Slc25a39
Hacl11	0.00040747	0.222169	0.784	0.757	1	2	HEP0	Hacl1
Hmgcl1	0.000329529	0.220444	0.807	0.773	1	2	HEP0	Hmgcl
Uqcrq1	1.71181198566754e-07	0.219544	1	0.982	0.00270963	2	HEP0	Uqcrq
Chchd21	4.31044758417165e-05	0.217704	0.996	0.977	0.682301	2	HEP0	Chchd2
Lactb21	0.000593613	0.217219	0.53	0.455	1	2	HEP0	Lactb2
Mst11	0.00998489	0.217182	0.648	0.643	1	2	HEP0	Mst1
Insig21	2.51728368414038e-05	0.21563	0.782	0.727	0.398461	2	HEP0	Insig2
Shmt11	0.000463437	0.215284	0.589	0.498	1	2	HEP0	Shmt1
Mdh11	1.42262759730625e-05	0.214986	0.912	0.928	0.225188	2	HEP0	Mdh1
Eif53	0.000508245	0.214673	0.704	0.672	1	2	HEP0	Eif5
Zfand61	0.00194328	0.212655	0.623	0.573	1	2	HEP0	Zfand6
Slc38a41	1.80791314865526e-07	0.211607	0.925	0.821	0.00286175	2	HEP0	Slc38a4
Qdpr1	3.02203815368406e-08	0.211232	0.901	0.847	0.000478358	2	HEP0	Qdpr
Spp21	0.000197312	0.21081	0.644	0.545	1	2	HEP0	Spp2
Kif1b1	0.00942599	0.210781	0.344	0.28	1	2	HEP0	Kif1b
Atp5g11	4.91694933401544e-05	0.209526	0.943	0.883	0.778304	2	HEP0	Atp5g1
Hsd17b41	6.21118464966789e-05	0.209418	0.807	0.77	0.983168	2	HEP0	Hsd17b4
Nipsnap11	0.00132364	0.208445	0.709	0.64	1	2	HEP0	Nipsnap1
Keg1	0.00401903	0.207189	0.367	0.294	1	2	HEP0	Keg1
Gm4952	0.00392772	0.206409	0.518	0.453	1	2	HEP0	Gm4952
Got21	0.000565951	0.205372	0.826	0.793	1	2	HEP0	Got2
Ugt2b341	6.44521406493662e-06	0.205144	0.751	0.667	0.102021	2	HEP0	Ugt2b34
Gnmt1	8.58992667395084e-11	0.20298	1	0.935	1.35969949321968e-06	2	HEP0	Gnmt
Ugt3a21	0.000164775	0.19918	0.776	0.706	1	2	HEP0	Ugt3a2
Acadl1	0.00946348	0.196999	0.761	0.745	1	2	HEP0	Acadl
Prkd31	0.00647382	0.196082	0.493	0.435	1	2	HEP0	Prkd3
Hrg1	2.21269849347989e-06	0.195789	0.935	0.873	0.0350248	2	HEP0	Hrg
Msra1	0.000630898	0.191715	0.702	0.66	1	2	HEP0	Msra
Gjb11	0.000270862	0.191408	0.847	0.817	1	2	HEP0	Gjb1
Idi11	0.000816238	0.18991	0.686	0.62	1	2	HEP0	Idi1
Uqcr111	2.14070958199526e-05	0.185769	0.992	0.959	0.338853	2	HEP0	Uqcr11
Aqp91	0.00218749	0.185577	0.677	0.621	1	2	HEP0	Aqp9
Slc2a2	3.13932751645794e-05	0.185089	0.503	0.386	0.496924	2	HEP0	Slc2a2
Apoa11	4.7829735083872e-08	0.184986	1	0.988	0.000757097	2	HEP0	Apoa1
Atp5a11	0.000500488	0.180995	0.962	0.949	1	2	HEP0	Atp5a1
S100a12	0.000734732	0.180089	0.841	0.79	1	2	HEP0	S100a1
Map1lc3b4	0.000674923	0.177589	0.771	0.835	1	2	HEP0	Map1lc3b
Gde13	0.00434001	0.177361	0.373	0.466	1	2	HEP0	Gde1
Mbl21	0.00256868	0.176296	0.864	0.86	1	2	HEP0	Mbl2
Suclg11	0.00151512	0.17599	0.788	0.757	1	2	HEP0	Suclg1
Rbp41	5.04930543253393e-12	0.175451	1	0.979	7.99254556915797e-08	2	HEP0	Rbp4
Mthfd11	0.00362255	0.175113	0.671	0.638	1	2	HEP0	Mthfd1
Echs11	0.00528595	0.173192	0.839	0.845	1	2	HEP0	Echs1
Atp5b1	0.000501354	0.172565	0.979	0.967	1	2	HEP0	Atp5b
Idh11	0.000251204	0.172011	0.86	0.813	1	2	HEP0	Idh1
Mettl261	0.00190876	0.166652	0.763	0.698	1	2	HEP0	Mettl26
Serpina1a1	7.1336312903942e-09	0.165758	1	0.985	0.000112918	2	HEP0	Serpina1a
Selenop1	9.3651609778158e-11	0.161005	1	0.976	1.48241133117846e-06	2	HEP0	Selenop
Ndufb111	0.0030498	0.158281	0.893	0.871	1	2	HEP0	Ndufb11
BC0243861	0.00278975	0.157797	0.725	0.655	1	2	HEP0	BC024386
Cyb5b1	0.000447382	0.156712	0.765	0.724	1	2	HEP0	Cyb5b
Lonp21	0.00530562	0.15366	0.769	0.745	1	2	HEP0	Lonp2
Cyp27a11	0.00955958	0.15238	0.797	0.761	1	2	HEP0	Cyp27a1
Hspd11	0.00725119	0.149795	0.857	0.829	1	2	HEP0	Hspd1
Glud11	1.62648081998088e-05	0.149382	0.945	0.928	0.257456	2	HEP0	Glud1
Rnd11	1.89219096757164e-09	0.145367	0.323	0.204	2.99514908256915e-05	2	HEP0	Rnd1
Ces2e1	0.000463209	0.143565	0.652	0.577	1	2	HEP0	Ces2e
Atp5g31	0.000102485	0.142779	0.933	0.877	1	2	HEP0	Atp5g3
Lgals91	0.00308193	0.142464	0.899	0.936	1	2	HEP0	Lgals9
Serpind11	0.00928612	0.142452	0.866	0.807	1	2	HEP0	Serpind1
Bhmt1	3.08860315618787e-15	0.138894	1	0.926	4.88894993592978e-11	2	HEP0	Bhmt
Sec14l21	0.000774119	0.136139	0.822	0.765	1	2	HEP0	Sec14l2
Serpinf11	0.000220127	0.133079	0.862	0.794	1	2	HEP0	Serpinf1
Plpp31	0.00699509	0.123963	0.589	0.522	1	2	HEP0	Plpp3
Fmc11	0.00690948	0.122857	0.612	0.536	1	2	HEP0	Fmc1
Mpc11	0.000760913	0.122233	0.885	0.846	1	2	HEP0	Mpc1
Lap31	0.00150417	0.122087	0.799	0.731	1	2	HEP0	Lap3
Cyp2d91	7.73042114766241e-14	0.115356	0.759	0.562	1.22364836346348e-09	2	HEP0	Cyp2d9
Cyp2a5	3.96176805493909e-05	0.112822	0.577	0.519	0.627108	2	HEP0	Cyp2a5
Hagh1	0.00963437	0.108063	0.849	0.789	1	2	HEP0	Hagh
Tle51	6.31216323373923e-05	0.107361	0.952	0.883	0.999152	2	HEP0	Tle5
Acot3	7.69095623177609e-265	3.62404	0.574	0.06	1.21740146192784e-260	3	HEP4	Acot3
Cyp4a141	5.68924455299649e-246	2.90614	0.974	0.363	9.00550520293815e-242	3	HEP4	Cyp4a14
Cyp2c69	4.95629766034915e-162	2.86321	0.609	0.134	7.84532356656667e-158	3	HEP4	Cyp2c69
Sult2a1	6.15574225726924e-99	2.82265	0.348	0.061	9.74392441903148e-95	3	HEP4	Sult2a1
Cyp2a41	6.49805163748113e-197	2.79482	0.667	0.127	1.02857659369689e-192	3	HEP4	Cyp2a4
Cyp4a102	5.55398513612856e-234	2.72595	0.97	0.398	8.79140307197789e-230	3	HEP4	Cyp4a10
Sult2a2	1.66941670384195e-129	2.69865	0.507	0.105	2.64251970051142e-125	3	HEP4	Sult2a2
Fmo3	5.56832511253965e-70	2.56824	0.25	0.043	8.81410182063901e-66	3	HEP4	Fmo3
Slc16a51	1.66399885548032e-109	2.46959	0.459	0.099	2.6339437883398e-105	3	HEP4	Slc16a5
Cyp2b91	1.66045089508877e-201	2.43131	0.815	0.219	2.62832772183601e-197	3	HEP4	Cyp2b9
A1bg	3.47842042978231e-132	2.38567	0.574	0.13	5.50599169830242e-128	3	HEP4	A1bg
Cyp2c401	1.44470121349858e-215	2.37018	0.954	0.332	2.28681755084691e-211	3	HEP4	Cyp2c40
Slc22a27	2.24239164742903e-63	2.32882	0.265	0.053	3.54948173871541e-59	3	HEP4	Slc22a27
Cyp2c372	2.40900578968929e-139	2.251	0.87	0.378	3.81321526449918e-135	3	HEP4	Cyp2c37
Cyp2c381	1.03527018371928e-67	2.24513	0.404	0.119	1.63872917380925e-63	3	HEP4	Cyp2c38
Acot11	4.03521578259838e-88	2.21828	0.483	0.135	6.38734306227498e-84	3	HEP4	Acot1
Etnppl3	1.35338805252196e-78	2.16804	0.509	0.166	2.142277948337e-74	3	HEP4	Etnppl
Gstt32	9.6134499412642e-153	2.12925	0.774	0.241	1.52171299120271e-148	3	HEP4	Gstt3
Gm137751	1.76421146138686e-90	2.10022	0.48	0.126	2.79257032222927e-86	3	HEP4	Gm13775
Ptgds	2.89129145764677e-53	2.09103	0.283	0.07	4.57662524830907e-49	3	HEP4	Ptgds
Cyp3a591	4.78187808374459e-70	2.07394	0.387	0.102	7.56923481875931e-66	3	HEP4	Cyp3a59
Odf3b1	2.30740562969763e-58	2.05939	0.313	0.079	3.65239237124838e-54	3	HEP4	Odf3b
Cyp2b102	8.41837987529062e-87	2.05106	0.457	0.117	1.33254535045975e-82	3	HEP4	Cyp2b10
Gsta22	4.78544687527363e-60	2.03733	0.393	0.121	7.57488385887063e-56	3	HEP4	Gsta2
Hsd17b61	8.70967917688108e-119	2.0191	0.854	0.499	1.37865511690851e-114	3	HEP4	Hsd17b6
Cyp2c542	1.97761539980555e-149	2.00267	0.874	0.344	3.1303674163522e-145	3	HEP4	Cyp2c54
Gm161572	8.68719325070443e-89	1.97939	0.539	0.164	1.375095819654e-84	3	HEP4	Gm16157
1810059H22Rik	4.60355579465825e-61	1.97564	0.322	0.079	7.28696846736455e-57	3	HEP4	1810059H22Rik
Sult2a72	7.80372440578855e-55	1.96602	0.311	0.081	1.23525153619227e-50	3	HEP4	Sult2a7
Mup104	8.44799777706369e-122	1.93337	0.735	0.257	1.33723356813141e-117	3	HEP4	Mup10
Fabp22	5.70009196059927e-143	1.916	0.887	0.415	9.02267556443258e-139	3	HEP4	Fabp2
Acot42	2.25059749431566e-80	1.90136	0.474	0.134	3.56247077375226e-76	3	HEP4	Acot4
Fmo2	4.45864925066041e-47	1.8969	0.259	0.065	7.05759589887037e-43	3	HEP4	Fmo2
Hectd2os2	2.30999516909046e-67	1.8845	0.415	0.119	3.65649135315329e-63	3	HEP4	Hectd2os
Paxx1	1.06604265051266e-121	1.88248	0.824	0.391	1.6874389114965e-117	3	HEP4	Paxx
Cyp2c682	2.56928267003746e-194	1.8743	0.998	0.559	4.06691753840229e-190	3	HEP4	Cyp2c68
Hacl13	5.50436220039803e-212	1.85927	1	0.736	8.71285492701004e-208	3	HEP4	Hacl1
Slc2a22	8.58915551760874e-131	1.85355	0.833	0.354	1.35957742688229e-126	3	HEP4	Slc2a2
Dhtkd1	1.8864840085368e-40	1.83137	0.27	0.079	2.9861155371129e-36	3	HEP4	Dhtkd1
Fabp14	1.7462533764997e-213	1.82633	1	0.989	2.76414446966138e-209	3	HEP4	Fabp1
Cyp2b131	1.4584780015374e-49	1.82333	0.27	0.066	2.30862482863355e-45	3	HEP4	Cyp2b13
Slco1a42	2.61196213098744e-81	1.81921	0.539	0.17	4.13447485714001e-77	3	HEP4	Slco1a4
Abca8a1	1.68237794378353e-85	1.8117	0.602	0.211	2.66303604721495e-81	3	HEP4	Abca8a
Cyp17a12	2.89022847441586e-71	1.79367	0.563	0.212	4.57494265215287e-67	3	HEP4	Cyp17a1
Notum3	4.20134179081981e-71	1.78507	0.439	0.124	6.65030392068868e-67	3	HEP4	Notum
Gm49522	9.18474978908016e-142	1.75556	0.9	0.416	1.4538540441135e-137	3	HEP4	Gm4952
Gm176341	3.13192546725935e-38	1.74887	0.259	0.076	4.95752482212482e-34	3	HEP4	Gm17634
Rnf186	3.40231085889098e-39	1.74073	0.276	0.084	5.38551785853854e-35	3	HEP4	Rnf186
Ces3b2	1.04303874432353e-168	1.70562	0.98	0.615	1.65102602838972e-164	3	HEP4	Ces3b
Mup143	5.65174300584523e-88	1.70477	0.646	0.237	8.94614400395242e-84	3	HEP4	Mup14
Socs2	2.27363111467225e-71	1.70329	0.537	0.19	3.59893069141471e-67	3	HEP4	Socs2
Acnat22	4.19007106852887e-77	1.68392	0.533	0.17	6.63246349437436e-73	3	HEP4	Acnat2
Angptl82	2.9855425576703e-158	1.68097	0.987	0.558	4.72581531453631e-154	3	HEP4	Angptl8
Npr21	1.04324325980909e-39	1.67903	0.3	0.096	1.65134975595181e-35	3	HEP4	Npr2
Hal3	9.86978231135056e-82	1.67504	0.867	0.613	1.56228784206368e-77	3	HEP4	Hal
Sugct3	3.93624251157103e-69	1.67487	0.53	0.186	6.23067827156579e-65	3	HEP4	Sugct
Abcd2	3.42789229111827e-52	1.67441	0.413	0.141	5.42601070761111e-48	3	HEP4	Abcd2
Cyp2f23	1.70419804979651e-79	1.67061	0.907	0.686	2.69757509302289e-75	3	HEP4	Cyp2f2
Homer2	1.21645897726926e-34	1.65226	0.261	0.082	1.92553291511951e-30	3	HEP4	Homer2
Nr1i33	2.21078424400047e-95	1.65148	0.735	0.307	3.49945037982834e-91	3	HEP4	Nr1i3
Prlr2	1.41083765990467e-116	1.64661	0.85	0.403	2.2332149318631e-112	3	HEP4	Prlr
Acy11	3.51075652104752e-56	1.63321	0.441	0.151	5.55717649716611e-52	3	HEP4	Acy1
Rida2	2.96065832365249e-153	1.63058	1	0.892	4.68642606050952e-149	3	HEP4	Rida
Hpgd2	2.65111828172765e-131	1.62985	0.917	0.532	4.1964551281467e-127	3	HEP4	Hpgd
Nr1d12	1.71412807279872e-47	1.62334	0.374	0.125	2.7132933264331e-43	3	HEP4	Nr1d1
Cyp2a53	4.13574010202626e-72	1.61983	0.8	0.497	6.54646300749736e-68	3	HEP4	Cyp2a5
Sgk23	5.11719733818157e-62	1.61837	0.502	0.179	8.1000116666076e-58	3	HEP4	Sgk2
Foxq12	5.16947013227487e-36	1.59858	0.293	0.098	8.18275427237789e-32	3	HEP4	Foxq1
Cth3	3.40973171047378e-152	1.59095	0.996	0.758	5.39726432450894e-148	3	HEP4	Cth
Abcg54	5.20402809219961e-60	1.58654	0.511	0.19	8.23745606714277e-56	3	HEP4	Abcg5
Gm37342	3.35001580615905e-38	1.58507	0.352	0.132	5.30274001956916e-34	3	HEP4	Gm3734
2610528J11Rik2	2.5822081626868e-37	1.58443	0.285	0.09	4.08737730071694e-33	3	HEP4	2610528J11Rik
Cyp2c504	4.00021645848596e-122	1.5819	0.948	0.548	6.33194263213743e-118	3	HEP4	Cyp2c50
Fam214a3	3.89519825642812e-57	1.58003	0.496	0.186	6.16570932010008e-53	3	HEP4	Fam214a
Lhpp3	2.74104249392983e-45	1.5764	0.509	0.229	4.33879616364153e-41	3	HEP4	Lhpp
Gm165481	5.36993636983122e-46	1.57559	0.376	0.128	8.50007227980584e-42	3	HEP4	Gm16548
Igfbp22	8.35227248382203e-154	1.574	0.993	0.719	1.32208121146419e-149	3	HEP4	Igfbp2
Slc1a24	6.55005473028993e-25	1.56339	0.372	0.181	1.03680816325759e-20	3	HEP4	Slc1a2
Aqp113	7.21896797800164e-52	1.55722	0.467	0.175	1.14269044123788e-47	3	HEP4	Aqp11
Trim24	2.5458421079848e-49	1.55133	0.433	0.158	4.02981347272913e-45	3	HEP4	Trim24
Ccdc152	2.91929290448177e-26	1.53517	0.311	0.133	4.62094873850419e-22	3	HEP4	Ccdc152
Pbld24	1.32049477706274e-97	1.53409	0.8	0.378	2.09021118261261e-93	3	HEP4	Pbld2
Bco21	6.05381013801185e-48	1.5324	0.407	0.142	9.58257606745896e-44	3	HEP4	Bco2
Magix1	9.86164683330728e-36	1.52499	0.291	0.096	1.56100007724421e-31	3	HEP4	Magix
Lipc2	2.66546656969335e-121	1.52385	0.915	0.509	4.2191670331676e-117	3	HEP4	Lipc
Zap702	6.45308008190019e-43	1.50923	0.413	0.16	1.02145804616398e-38	3	HEP4	Zap70
Gm47561	1.75147496310435e-29	1.50757	0.28	0.104	2.77240971909788e-25	3	HEP4	Gm4756
5033403H07Rik2	1.64635033902587e-79	1.5062	0.748	0.372	2.60600795164405e-75	3	HEP4	5033403H07Rik
Maob3	4.87141730328403e-97	1.50091	0.835	0.44	7.71096644936829e-93	3	HEP4	Maob
Gm486332	5.53839814519157e-57	1.49294	0.498	0.184	8.76673042402374e-53	3	HEP4	Gm48633
Acot123	7.59891667836009e-62	1.49056	0.589	0.245	1.20283252101762e-57	3	HEP4	Acot12
Acsm54	1.35705481295555e-61	1.48549	0.572	0.228	2.14808206342734e-57	3	HEP4	Acsm5
Igfals2	2.73627788088978e-92	1.48084	0.807	0.387	4.33125425766044e-88	3	HEP4	Igfals
Inmt4	2.25841900675994e-141	1.47639	0.991	0.666	3.57485144580032e-137	3	HEP4	Inmt
Rdh94	5.3448261223756e-67	1.47457	0.713	0.365	8.46032526910834e-63	3	HEP4	Rdh9
Hykk2	3.51445102429364e-36	1.47424	0.37	0.146	5.56302452635441e-32	3	HEP4	Hykk
Keg14	6.55006815713213e-66	1.46793	0.63	0.269	1.03681028859245e-61	3	HEP4	Keg1
Gm47372	5.68072692028185e-35	1.46639	0.354	0.138	8.99202264211414e-31	3	HEP4	Gm4737
Rbp44	1.25433209737838e-196	1.46437	1	0.979	1.98548227694024e-192	3	HEP4	Rbp4
Gm420672	4.99688219647454e-42	1.45914	0.359	0.123	7.90956482879955e-38	3	HEP4	Gm42067
Apoa24	2.69143715055991e-192	1.45385	1	0.998	4.26027586562127e-188	3	HEP4	Apoa2
Lifr3	3.21193811100348e-111	1.44774	0.924	0.611	5.08417683590741e-107	3	HEP4	Lifr
Cryl12	3.57019914812944e-27	1.44652	0.304	0.125	5.65126823157409e-23	3	HEP4	Cryl1
Pctp3	1.3277106726473e-70	1.44623	0.7	0.343	2.1016332237334e-66	3	HEP4	Pctp
Cyp39a11	2.91522748211207e-34	1.44603	0.309	0.109	4.6145135814352e-30	3	HEP4	Cyp39a1
Gm335431	1.48378839498224e-27	1.4458	0.252	0.089	2.34868865041739e-23	3	HEP4	Gm33543
Cbr12	8.63207607837119e-128	1.44446	0.952	0.603	1.36637132244538e-123	3	HEP4	Cbr1
Mpzl21	3.37681230008265e-27	1.44248	0.278	0.106	5.34515618980083e-23	3	HEP4	Mpzl2
Akr1c203	1.2911822380738e-85	1.43605	0.804	0.412	2.04381236464701e-81	3	HEP4	Akr1c20
Cd300lg2	8.82153448047953e-32	1.43527	0.3	0.109	1.3963606929151e-27	3	HEP4	Cd300lg
Slc10a13	3.62838019394967e-155	1.43224	1	0.697	5.74336300900293e-151	3	HEP4	Slc10a1
Dpys2	8.19937166323222e-122	1.43218	0.937	0.57	1.29787854057303e-117	3	HEP4	Dpys
Sult2a83	2.61999768098935e-114	1.42845	0.95	0.571	4.14719432923804e-110	3	HEP4	Sult2a8
Mfsd4b11	3.57820542753321e-36	1.42796	0.348	0.129	5.66394137124232e-32	3	HEP4	Mfsd4b1
Gstt21	5.05839273698411e-64	1.42775	0.613	0.254	8.00692986337215e-60	3	HEP4	Gstt2
Nt5e1	5.69679491913781e-30	1.42403	0.285	0.104	9.01745667750324e-26	3	HEP4	Nt5e
Tmem254	6.90291013733029e-40	1.4234	0.389	0.149	1.09266164563801e-35	3	HEP4	Tmem25
Rapgef42	1.5228892453288e-77	1.42152	0.763	0.392	2.41058138643095e-73	3	HEP4	Rapgef4
Pde9a1	8.25983572941861e-33	1.42091	0.313	0.115	1.30744939760967e-28	3	HEP4	Pde9a
Bdh12	9.49726897406594e-105	1.42073	0.909	0.579	1.5033227059049e-100	3	HEP4	Bdh1
Apoa43	1.75631219625213e-68	1.41579	0.717	0.354	2.78006657544749e-64	3	HEP4	Apoa4
Leap23	1.1305439215627e-140	1.41439	0.978	0.605	1.7895379734416e-136	3	HEP4	Leap2
Abat1	1.53315535402203e-120	1.41379	0.939	0.609	2.42683160988147e-116	3	HEP4	Abat
Mfsd2a1	3.86936283769389e-28	1.41314	0.263	0.095	6.12481443578566e-24	3	HEP4	Mfsd2a
Sdr42e13	1.81272420675764e-63	1.41255	0.643	0.287	2.86936114687667e-59	3	HEP4	Sdr42e1
Acsm34	2.59485172745241e-54	1.41205	0.554	0.234	4.10739079938442e-50	3	HEP4	Acsm3
Avpr1a3	7.58516318615443e-44	1.40702	0.45	0.182	1.20065548073638e-39	3	HEP4	Avpr1a
Agxt3	3.2901908559184e-167	1.40141	1	0.804	5.20804310583323e-163	3	HEP4	Agxt
Cyp2a123	4.10330134128147e-129	1.40027	0.976	0.686	6.49511569311444e-125	3	HEP4	Cyp2a12
Pah3	1.85924486188625e-170	1.39811	1	0.81	2.94299869187975e-166	3	HEP4	Pah
Aldh3a22	1.87035173241363e-53	1.39397	0.652	0.348	2.96057975723754e-49	3	HEP4	Aldh3a2
Slc16a71	6.65746216992895e-45	1.39068	0.417	0.153	1.05380968687805e-40	3	HEP4	Slc16a7
Alb3	2.02525587425756e-152	1.38988	1	0.997	3.20577752336229e-148	3	HEP4	Alb
Nlrp123	2.13900796724858e-67	1.38911	0.574	0.216	3.38583571135778e-63	3	HEP4	Nlrp12
Slc25a134	6.60156846519029e-74	1.38611	0.752	0.393	1.04496227235497e-69	3	HEP4	Slc25a13
Slc47a13	8.77562174040422e-40	1.38488	0.402	0.156	1.38909316528858e-35	3	HEP4	Slc47a1
4930481A15Rik2	4.11988365455762e-28	1.37794	0.283	0.106	6.52136383679926e-24	3	HEP4	4930481A15Rik
Ces1f4	1.36897687338042e-130	1.37613	0.972	0.611	2.16695349287387e-126	3	HEP4	Ces1f
Gm407701	3.19657076073951e-25	1.37584	0.27	0.105	5.05985185717457e-21	3	HEP4	Gm40770
1810024B03Rik	8.15182297683238e-27	1.37457	0.261	0.095	1.2903520590028e-22	3	HEP4	1810024B03Rik
Oat3	6.403401568155e-49	1.37061	0.941	0.764	1.01359443422325e-44	3	HEP4	Oat
Gm361721	1.75524661042e-25	1.36794	0.274	0.107	2.77837985963383e-21	3	HEP4	Gm36172
Nat8f14	1.66796417866528e-164	1.36648	1	0.786	2.64022049840926e-160	3	HEP4	Nat8f1
Gm324612	5.96709590780811e-30	1.36445	0.32	0.125	9.44531611246946e-26	3	HEP4	Gm32461
Car82	6.84473029788028e-59	1.36276	0.62	0.273	1.08345235885147e-54	3	HEP4	Car8
Pon14	5.55377037808081e-134	1.36011	1	0.788	8.79106313146411e-130	3	HEP4	Pon1
Akr1d13	3.45696650903113e-86	1.35851	0.85	0.509	5.47203228714538e-82	3	HEP4	Akr1d1
Plscr21	2.03322000646011e-33	1.35837	0.348	0.135	3.2183839482257e-29	3	HEP4	Plscr2
Suox3	8.94641800685171e-59	1.35809	0.639	0.302	1.41612850630456e-54	3	HEP4	Suox
Oxld12	6.92941135243474e-42	1.35573	0.426	0.166	1.09685652297689e-37	3	HEP4	Oxld1
Gm40133	1.235192116076e-40	1.35275	0.424	0.167	1.95518560053669e-36	3	HEP4	Gm4013
Shmt13	2.81244038009196e-98	1.3527	0.883	0.47	4.45181187764756e-94	3	HEP4	Shmt1
Acy33	1.76310432293133e-70	1.35234	0.728	0.357	2.79081783276801e-66	3	HEP4	Acy3
Hdhd33	1.88061312245847e-37	1.35108	0.4	0.16	2.97682251153952e-33	3	HEP4	Hdhd3
Amdhd13	6.28796751811041e-76	1.33857	0.854	0.588	9.95322378441697e-72	3	HEP4	Amdhd1
Rdh16f23	6.6296515960672e-124	1.33737	0.983	0.606	1.04940755114148e-119	3	HEP4	Rdh16f2
Kyat33	9.09517577241062e-114	1.33453	0.954	0.675	1.43967537301488e-109	3	HEP4	Kyat3
Macrod14	5.74781358720661e-53	1.33144	0.541	0.219	9.09821412718934e-49	3	HEP4	Macrod1
Cda3	2.74178481207403e-51	1.3264	0.554	0.238	4.33997117903198e-47	3	HEP4	Cda
Shpk1	1.44698918073106e-32	1.3245	0.363	0.147	2.29043917417919e-28	3	HEP4	Shpk
Entpd83	3.01955960380277e-63	1.32343	0.722	0.37	4.7796608968594e-59	3	HEP4	Entpd8
Hdac114	1.80423842752392e-37	1.31719	0.413	0.169	2.85592900692761e-33	3	HEP4	Hdac11
Mup32	1.46876733433594e-129	1.31631	1	0.945	2.32491181352035e-125	3	HEP4	Mup3
Ugt2a33	4.03452590638269e-83	1.31416	0.85	0.482	6.38625105721316e-79	3	HEP4	Ugt2a3
Sall11	2.41911351242308e-23	1.31411	0.276	0.114	3.8292147788145e-19	3	HEP4	Sall1
Mbl23	1.29871158449386e-154	1.31329	1	0.847	2.05573056709533e-150	3	HEP4	Mbl2
Retsat3	9.40399090893379e-80	1.31165	0.822	0.43	1.48855772097513e-75	3	HEP4	Retsat
Rdh163	7.64918469036584e-35	1.31102	0.378	0.151	1.21078944463801e-30	3	HEP4	Rdh16
Acsf24	4.96830908363955e-35	1.31028	0.413	0.177	7.86433644849305e-31	3	HEP4	Acsf2
Etfrf13	9.70729547996477e-42	1.30968	0.507	0.226	1.53656780152362e-37	3	HEP4	Etfrf1
Fgf14	3.41953411846945e-39	1.30897	0.457	0.197	5.41278055612529e-35	3	HEP4	Fgf1
Clcn21	9.66806553646377e-28	1.3073	0.322	0.132	1.53035809376685e-23	3	HEP4	Clcn2
Mup93	1.04092583220487e-33	1.30705	0.38	0.158	1.64768149979708e-29	3	HEP4	Mup9
Rgn4	2.31861210650124e-118	1.30592	0.996	0.868	3.67013110338081e-114	3	HEP4	Rgn
Ces1c4	3.73537120263869e-170	1.30577	1	0.95	5.91271907665678e-166	3	HEP4	Ces1c
Mgll4	3.27355228824018e-47	1.30514	0.548	0.243	5.18170591705538e-43	3	HEP4	Mgll
Abcb112	1.48716479442965e-143	1.30489	0.989	0.762	2.35403315310269e-139	3	HEP4	Abcb11
Rad51b4	1.31960090680874e-40	1.30225	0.439	0.178	2.08879627538755e-36	3	HEP4	Rad51b
Car143	4.60121159265399e-34	1.30225	0.365	0.144	7.283257830012e-30	3	HEP4	Car14
Apol7a5	8.59813394508722e-60	1.30152	0.667	0.327	1.36099862216786e-55	3	HEP4	Apol7a
Ttc383	2.20433589193172e-43	1.29749	0.496	0.213	3.48924328333873e-39	3	HEP4	Ttc38
Mccc22	4.42219877443201e-47	1.29678	0.543	0.241	6.99989844004843e-43	3	HEP4	Mccc2
Akr1c144	1.62066613776979e-58	1.29465	0.707	0.392	2.56535242947579e-54	3	HEP4	Akr1c14
Sult1a13	1.12220160972393e-146	1.29235	0.998	0.763	1.77633292803201e-142	3	HEP4	Sult1a1
Ggnbp12	1.28418821998347e-31	1.29188	0.337	0.131	2.03274153341184e-27	3	HEP4	Ggnbp1
Gsta43	2.11015911976986e-74	1.28974	0.791	0.424	3.34017087068371e-70	3	HEP4	Gsta4
Cyb5a3	3.48731307538081e-179	1.28529	1	0.982	5.52006786702028e-175	3	HEP4	Cyb5a
Fahd2a2	1.33923705850461e-30	1.28435	0.348	0.142	2.11987833990694e-26	3	HEP4	Fahd2a
Egr12	1.43594502469974e-54	1.28357	0.552	0.221	2.27295737959722e-50	3	HEP4	Egr1
1700001C19Rik1	5.91465775516197e-25	1.27859	0.27	0.104	9.36231176064588e-21	3	HEP4	1700001C19Rik
Mmd22	1.26557389234324e-25	1.27851	0.307	0.127	2.00327691419012e-21	3	HEP4	Mmd2
Gnmt5	8.08886622470543e-162	1.27789	1	0.935	1.28038663470862e-157	3	HEP4	Gnmt
Amt2	3.7737114554607e-23	1.27784	0.298	0.129	5.97340786284875e-19	3	HEP4	Amt
Foxa22	2.11677945719983e-39	1.27709	0.428	0.172	3.35065020280161e-35	3	HEP4	Foxa2
Serpina64	4.06126460918572e-71	1.27641	0.817	0.498	6.42857574988007e-67	3	HEP4	Serpina6
Prox1os1	1.79161252054218e-26	1.27508	0.296	0.117	2.83594345876622e-22	3	HEP4	Prox1os
Slc17a43	1.25686182976278e-34	1.274	0.393	0.162	1.98948659033151e-30	3	HEP4	Slc17a4
Fbxo361	1.20879060235268e-20	1.27348	0.254	0.107	1.91339464446406e-16	3	HEP4	Fbxo36
Ugt3a14	1.08749292858779e-45	1.27091	0.557	0.258	1.72139255666162e-41	3	HEP4	Ugt3a1
Pcca3	2.1492373334138e-65	1.26786	0.75	0.403	3.40202777506071e-61	3	HEP4	Pcca
Serpina1b3	5.70815974397689e-164	1.26704	1	0.986	9.03544605874102e-160	3	HEP4	Serpina1b
Aldh5a12	1.55678579515937e-32	1.26473	0.389	0.165	2.46423623515777e-28	3	HEP4	Aldh5a1
Gm135221	5.77132517211521e-19	1.2633	0.25	0.109	9.13543061494116e-15	3	HEP4	Gm13522
Tmem2202	5.12299482326462e-30	1.26185	0.343	0.14	8.10918850574557e-26	3	HEP4	Tmem220
Spp23	9.18743200408105e-97	1.26126	0.917	0.519	1.45427861192599e-92	3	HEP4	Spp2
Cyp4f144	1.22966225839824e-107	1.25998	0.946	0.589	1.94643238881857e-103	3	HEP4	Cyp4f14
Slco1a13	5.12320090387133e-30	1.25825	0.415	0.191	8.10951471073793e-26	3	HEP4	Slco1a1
1190005I06Rik3	6.2930804296545e-28	1.25816	0.341	0.144	9.9613170121001e-24	3	HEP4	1190005I06Rik
Hmgcs23	1.90356658728393e-177	1.25759	1	0.935	3.01315555101174e-173	3	HEP4	Hmgcs2
Mccc12	4.51233945755413e-34	1.25445	0.42	0.182	7.14258212736244e-30	3	HEP4	Mccc1
Cyp2c234	1.74590798377126e-90	1.25026	0.883	0.566	2.76359774751152e-86	3	HEP4	Cyp2c23
Hamp22	2.43359988273853e-116	1.24967	0.996	0.792	3.85214525438682e-112	3	HEP4	Hamp2
Slc27a24	8.46104065434049e-141	1.2482	0.998	0.791	1.33929812517556e-136	3	HEP4	Slc27a2
Plekha61	7.69663450357921e-26	1.24788	0.328	0.142	1.21830027557155e-21	3	HEP4	Plekha6
Gatb2	9.04937099461013e-32	1.24579	0.393	0.171	1.43242493473684e-27	3	HEP4	Gatb
Gm27883	3.12539994973144e-62	1.24406	0.735	0.402	4.94719558042989e-58	3	HEP4	Gm2788
Pdk24	1.999075976331e-41	1.24305	0.507	0.226	3.16433736293434e-37	3	HEP4	Pdk2
Prodh4	3.02917694204515e-81	1.24216	0.846	0.502	4.79488418156326e-77	3	HEP4	Prodh
Sco23	1.43159489647764e-44	1.2384	0.607	0.309	2.26607156163446e-40	3	HEP4	Sco2
Palmd2	1.1885142655846e-22	1.23625	0.274	0.113	1.88129923099386e-18	3	HEP4	Palmd
D130020L05Rik4	2.14802674194924e-40	1.23343	0.491	0.215	3.40011152983145e-36	3	HEP4	D130020L05Rik
Cyp2e14	6.57451624644663e-73	1.23109	0.989	0.881	1.04068017665004e-68	3	HEP4	Cyp2e1
Gstk15	1.14341283679219e-104	1.23013	0.941	0.661	1.80990817935837e-100	3	HEP4	Gstk1
Apoc33	1.85836945586716e-169	1.2301	1	0.988	2.94161301169212e-165	3	HEP4	Apoc3
Ndrg24	1.38805203768926e-165	1.22493	1	0.904	2.19714757045833e-161	3	HEP4	Ndrg2
C030006K11Rik1	2.8216600444189e-28	1.22352	0.343	0.144	4.46640568431068e-24	3	HEP4	C030006K11Rik
Hpd4	2.04869332464358e-157	1.22343	1	0.925	3.24287666357833e-153	3	HEP4	Hpd
Slco1b24	1.63076487840662e-108	1.22008	0.998	0.801	2.58133772602984e-104	3	HEP4	Slco1b2
Ccl27a2	1.38576690441375e-25	1.21895	0.335	0.146	2.19353043299653e-21	3	HEP4	Ccl27a
Agtr1a3	1.49532510592844e-50	1.2189	0.613	0.287	2.36695011017413e-46	3	HEP4	Agtr1a
Tm6sf22	7.05827904809929e-37	1.21833	0.441	0.188	1.11725499052364e-32	3	HEP4	Tm6sf2
Acsl14	1.04341512009809e-126	1.21729	0.987	0.765	1.65162179360327e-122	3	HEP4	Acsl1
C8g3	1.93756589107862e-155	1.21711	1	0.872	3.06697304898835e-151	3	HEP4	C8g
Fbxo212	2.52822571940009e-30	1.21711	0.398	0.178	4.0019284912384e-26	3	HEP4	Fbxo21
Csrp34	7.86280713515595e-54	1.21598	0.643	0.303	1.24460374142383e-49	3	HEP4	Csrp3
Pbld13	7.1019282750018e-68	1.21516	0.807	0.473	1.12416422665003e-63	3	HEP4	Pbld1
Cps13	2.65287768190134e-150	1.21412	1	0.908	4.19924008268163e-146	3	HEP4	Cps1
Echdc32	4.82533415261902e-57	1.21401	0.733	0.428	7.63802143018064e-53	3	HEP4	Echdc3
Gstm44	2.58485581924198e-48	1.21219	0.617	0.302	4.09156827627812e-44	3	HEP4	Gstm4
Chac23	3.00961138402179e-37	1.2093	0.474	0.214	4.76391385976809e-33	3	HEP4	Chac2
Inca11	3.54435513553746e-19	1.20406	0.276	0.126	5.61035974404225e-15	3	HEP4	Inca1
Hsd17b22	1.53072986309754e-91	1.20353	0.911	0.59	2.4229923002971e-87	3	HEP4	Hsd17b2
Cmbl3	1.34860022661238e-99	1.19771	0.941	0.623	2.13469929870473e-95	3	HEP4	Cmbl
A930005H10Rik2	2.3846705507769e-22	1.19543	0.3	0.132	3.77469501482475e-18	3	HEP4	A930005H10Rik
Abca63	5.23292110671968e-29	1.19362	0.365	0.156	8.28319081982657e-25	3	HEP4	Abca6
Bcar33	8.6744370194326e-29	1.19338	0.378	0.166	1.37307663580599e-24	3	HEP4	Bcar3
B630019A10Rik3	1.51142974773945e-50	1.19333	0.643	0.319	2.39244214769678e-46	3	HEP4	B630019A10Rik
Rassf71	2.85253536843292e-24	1.19326	0.307	0.131	4.51527823469246e-20	3	HEP4	Rassf7
Ido23	1.14851041139395e-34	1.19296	0.48	0.227	1.81797713019548e-30	3	HEP4	Ido2
Abca8b4	1.05154833806178e-31	1.19256	0.398	0.172	1.66449586431799e-27	3	HEP4	Abca8b
Rgl31	3.39052911292747e-26	1.19192	0.365	0.166	5.36686853285289e-22	3	HEP4	Rgl3
Otc3	1.6663263466704e-117	1.19038	0.996	0.764	2.63762797414458e-113	3	HEP4	Otc
Gls24	7.66963570115203e-67	1.18783	0.917	0.725	1.21402663513535e-62	3	HEP4	Gls2
Mcrip22	2.1038815275648e-52	1.18769	0.635	0.297	3.33023406998233e-48	3	HEP4	Mcrip2
[truncated: 34,313 more rows]
